# Supplementary material for: A New Prognostic Risk Model Based on PPAR Pathway-Related Genes in Kidney Renal Clear Cell Carcinoma
Source: Hindawi journal article supplement (doi:10.1155/2020/6937475), 2020-09-22
Supplement: f1 [file 6937475.f1.pdf]

Table S1: Correlation value for co-expression analysis

|         | ANGPTL4    | MMP1       | PCK2       | PPARG      | ACOX2      | PLIN2      |
|---------|------------|------------|------------|------------|------------|------------|
| ANGPTL4 | 1          | -0.0184464 | -0.2552096 | -0.0811196 | -0.2565425 | 0.38591585 |
| MMP1    | -0.0184464 | 1          | -0.0288346 | -0.0316139 | -0.0354995 | -0.0071184 |
| PCK2    | -0.2552096 | -0.0288346 | 1          | -0.0801206 | 0.90302885 | -0.1005927 |
| PPARG   | -0.0811196 | -0.0316139 | -0.0801206 | 1          | -0.0629468 | 0.02951194 |
| ACOX2   | -0.2565425 | -0.0354995 | 0.90302885 | -0.0629468 | 1          | -0.094205  |
| PLIN2   | 0.38591585 | -0.0071184 | -0.1005927 | 0.02951194 | -0.094205  | 1          |
| CYP27A1 | 0.11953494 | -0.012831  | 0.19819217 | 0.08078134 | 0.12914273 | 0.2553952  |
| SORBS1  | 0.11789041 | -0.0267564 | -0.1827901 | 0.0062488  | -0.156086  | 0.04512845 |
| OLR1    | -0.0263707 | 0.03364119 | -0.0556009 | -0.1482729 | -0.0765882 | 0.12987974 |
| CYP8B1  | -0.0655206 | -0.0336306 | 0.45386447 | -0.1743476 | 0.47595452 | -0.0768912 |
| FABP5   | 0.21957362 | 0.08329121 | -0.227727  | -0.0966754 | -0.2683439 | -0.0006737 |
| SLC27A6 | -0.1222707 | 0.08403352 | -0.0037225 | 0.11333393 | 0.00291751 | -0.1134706 |
| ACSBG2  | -0.1976122 | -0.0342699 | 0.67848119 | -0.0753198 | 0.64557743 | -0.1483702 |
| GK2     | 0.02048176 | -0.000965  | -0.0330438 | 0.04218702 | -0.0406508 | -0.0302085 |
| ACOX3   | 0.01573885 | 0.10236799 | -0.0878719 | -0.1911023 | -0.0735226 | -0.0799165 |
| UBC     | 0.47351863 | 0.02879384 | -0.3326499 | -0.0940304 | -0.3282984 | 0.28326051 |
| NR1H3   | 0.2573668  | -0.0161351 | -0.1280569 | -0.141598  | -0.1938236 | 0.27662187 |
| ACSL5   | -0.0236537 | -0.0476122 | -0.2494405 | -0.0716529 | -0.250804  | 0.08403133 |
| DBI     | -0.1103342 | -0.0179904 | 0.18980618 | -0.0053111 | 0.22205818 | -0.0555311 |
| FABP1   | -0.2579715 | -0.0261851 | 0.85480117 | -0.0976665 | 0.81023099 | -0.1626149 |
| PDPK1   | -0.3961516 | -0.0964069 | 0.24170278 | 0.08831051 | 0.29469209 | 0.0128224  |
| GK      | -0.2881527 | -0.0465161 | 0.767012   | 0.0694413  | 0.73107896 | 0.0695314  |
| SLC27A5 | -0.0561427 | -0.0120759 | 0.13759091 | 0.01440373 | 0.16134863 | -0.0755516 |
| FABP6   | 0.34527758 | 0.01443056 | -0.1628133 | -0.2422451 | -0.150421  | 0.11854659 |
| RXRβ    | -0.0444228 | -0.0362883 | -0.0200656 | -0.0315142 | 0.03598232 | -0.0161433 |
| APOA5   | -0.0428588 | -0.0039477 | 0.11322572 | -0.0135774 | 0.14082019 | -0.0408087 |
| PLIN4   | -0.0843185 | -0.0045751 | 0.03346701 | 0.15508783 | 0.08976907 | -0.0310618 |
| APOA2   | -0.0426137 | -0.0052138 | 0.11168736 | -0.0007511 | 0.14225503 | -0.0089136 |
| PPARA   | -0.3916332 | -0.0849679 | 0.57326176 | 0.16937544 | 0.59576735 | -0.0276388 |
| FABP7   | 0.17461914 | -0.0106361 | -0.1343003 | -0.0508516 | -0.1166141 | 0.04832058 |
| SLC27A4 | -0.3749133 | -0.0259574 | 0.25915954 | 0.18595965 | 0.24074672 | -0.3194843 |
| SLC27A2 | -0.1207742 | -0.0600194 | 0.65920175 | 0.07559305 | 0.62884401 | 0.16221768 |
| SCD     | 0.22003117 | 0.00911221 | -0.2194823 | -0.1536681 | -0.2495347 | 0.28359116 |
| CPT1A   | -0.2358797 | -0.0832411 | 0.22665495 | 0.3250108  | 0.25053133 | 0.0713875  |
| ACSBG1  | -0.0668969 | -0.0104311 | -0.0241919 | 0.08818939 | -0.0420459 | -0.086278  |
| SCD5    | -0.268243  | -0.0314069 | 0.18057151 | -0.0733852 | 0.22043423 | -0.2740956 |
| CYP4A11 | -0.0513418 | -0.0389765 | 0.64246509 | 0.07066137 | 0.61015763 | 0.22861613 |
| PLTP    | 0.09527797 | 0.02242799 | -0.098961  | -0.2578443 | -0.0845911 | -0.1302079 |
| ADIPOQ  | -0.0591563 | -0.0071935 | -0.0173237 | 0.01531389 | 0.00564303 | -0.0391242 |
| ACOX1   | -0.3617371 | -0.076246  | 0.73917787 | 0.05958804 | 0.70378269 | 0.0153479  |
| ACSL6   | -0.2341075 | -0.0359063 | 0.30982154 | 0.03205997 | 0.30853388 | -0.1248066 |
| PLIN1   | 0.00186826 | -0.0106968 | -0.0351737 | 0.00394715 | -0.0060732 | 0.01790474 |
| ACAA1   | -0.2718777 | -0.0508101 | 0.84870732 | -0.0333389 | 0.80130924 | -0.1369281 |
| ACSL3   | -0.4752871 | -0.059093  | 0.188907   | 0.25410135 | 0.18130362 | -0.2227233 |

|         |            |            |            |            |            |            |
|---------|------------|------------|------------|------------|------------|------------|
| CD36    | 0.2119116  | -0.0047645 | -0.1549219 | 0.29905613 | -0.152621  | 0.26480918 |
| CPT1B   | 0.1020781  | -0.0203718 | -0.1309509 | 0.17006525 | -0.1275456 | -0.0084242 |
| FABP3   | 0.01852679 | -0.0510027 | 0.16273771 | 0.06178096 | 0.21334355 | 0.09786583 |
| CYP7A1  | -0.041902  | -0.0028154 | 0.1106209  | -0.0121746 | 0.13918922 | -0.0361957 |
| CPT1C   | 0.09974077 | 0.00929119 | -0.2164113 | -0.1390696 | -0.2265228 | -0.0898239 |
| PPARD   | 0.28767735 | 0.02419079 | -0.1911449 | -0.0511146 | -0.1775097 | -0.0092928 |
| APOC3   | -0.0442978 | -0.0042835 | 0.12118232 | -0.0172142 | 0.14740606 | -0.0390897 |
| RXRG    | -0.0917775 | -0.0362096 | 0.05522595 | 0.15462351 | 0.08710093 | 0.03305595 |
| UCP1    | -0.1031845 | -0.0177238 | -0.0468862 | 0.16595761 | -0.0259706 | -0.0908845 |
| ACSL4   | -0.3947396 | -0.0049857 | 0.31699864 | -0.0777993 | 0.32040565 | -0.2752336 |
| EHHADH  | -0.1050967 | -0.0628078 | 0.58221116 | 0.02081511 | 0.57596335 | 0.34747955 |
| PCK1    | -0.2289249 | -0.0396967 | 0.80945237 | -0.0271354 | 0.73631881 | -0.0627752 |
| RXRA    | 0.0481344  | -0.0599623 | 0.10815239 | -0.1579045 | 0.12622491 | 0.11398718 |
| PLIN5   | -0.2749759 | -0.0076209 | 0.20663042 | 0.25983559 | 0.23052332 | -0.303839  |
| APOA1   | -0.0432919 | -0.0044053 | 0.11914094 | -0.0145835 | 0.1465074  | -0.0385659 |
| SCP2    | -0.3018309 | -0.0488665 | 0.43021477 | 0.08420648 | 0.42137216 | 0.04276251 |
| SLC27A1 | 0.10686011 | -0.0367134 | -0.1651765 | 0.11676555 | -0.0786412 | 0.01068696 |
| FABP2   | -0.1556754 | -0.0011264 | 0.27384271 | 0.02953004 | 0.31829928 | -0.0938445 |
| ACADM   | -0.3678096 | -0.0673837 | 0.69224946 | 0.05023034 | 0.67474987 | -0.0046794 |
| ACADL   | 0.11968302 | -0.0602532 | -0.0210207 | 0.31090983 | -0.0155974 | 0.40947356 |
| AQP7    | -0.1511559 | -0.0486845 | 0.424281   | 0.23069532 | 0.39712027 | 0.14655603 |
| FADS2   | 0.22196418 | -0.0125808 | -0.1046031 | -0.1588155 | -0.1068174 | 0.13959196 |
| CYP4A22 | -0.0478059 | -0.0347657 | 0.61074204 | 0.06959438 | 0.54206067 | 0.17625491 |
| LPL     | -0.1864044 | -0.0249779 | 0.06533355 | 0.15301874 | 0.08174488 | -0.1144486 |
| ILK     | -0.0561946 | -0.0740632 | -0.0916335 | 0.06781931 | -0.0512705 | 0.28144583 |
| ACSL1   | -0.2373994 | -0.0255984 | 0.21819622 | 0.43924522 | 0.26003481 | 0.14871317 |
| FABP4   | 0.07373104 | -0.0185605 | -0.0184029 | 0.29179908 | -0.0112001 | 0.11361599 |
| CPT2    | -0.1925362 | -0.0765418 | 0.42385972 | 0.08487787 | 0.42207226 | 0.27728603 |

| CYP27A1    | SORBS1     | OLR1       | CYP8B1     | FABP5      | SLC27A6    | ACSBG2     |
|------------|------------|------------|------------|------------|------------|------------|
| 0.11953494 | 0.11789041 | -0.0263707 | -0.0655206 | 0.21957362 | -0.1222707 | -0.1976122 |
| -0.012831  | -0.0267564 | 0.03364119 | -0.0336306 | 0.08329121 | 0.08403352 | -0.0342699 |
| 0.19819217 | -0.1827901 | -0.0556009 | 0.45386447 | -0.227727  | -0.0037225 | 0.67848119 |
| 0.08078134 | 0.0062488  | -0.1482729 | -0.1743476 | -0.0966754 | 0.11333393 | -0.0753198 |
| 0.12914273 | -0.156086  | -0.0765882 | 0.47595452 | -0.2683439 | 0.00291751 | 0.64557743 |
| 0.2553952  | 0.04512845 | 0.12987974 | -0.0768912 | -0.0006737 | -0.1134706 | -0.1483702 |
| 1          | -0.0732643 | 0.08601243 | 0.00372353 | -0.0319218 | -0.0691589 | 0.09169451 |
| -0.0732643 | 1          | -0.028286  | -0.0230532 | -0.016361  | -0.0418084 | -0.1072776 |
| 0.08601243 | -0.028286  | 1          | 0.03998512 | -0.0145654 | -0.033823  | -0.023355  |
| 0.00372353 | -0.0230532 | 0.03998512 | 1          | -0.1704566 | -0.0190714 | 0.3050675  |
| -0.0319218 | -0.016361  | -0.0145654 | -0.1704566 | 1          | -0.0113328 | -0.2202652 |
| -0.0691589 | -0.0418084 | -0.033823  | -0.0190714 | -0.0113328 | 1          | -0.0216108 |
| 0.09169451 | -0.1072776 | -0.023355  | 0.3050675  | -0.2202652 | -0.0216108 | 1          |
| -0.058529  | -0.0117554 | -0.0369056 | 0.00023304 | 0.00045586 | 0.02062496 | 0.16784915 |
| -0.1841377 | -0.0524305 | 0.08696495 | 0.11289699 | 0.06137453 | -0.0450073 | -0.0532691 |
| 0.04025506 | 0.12412495 | 0.09263961 | -0.1266433 | 0.16037993 | -0.0893609 | -0.220428  |
| 0.30438765 | 0.07352819 | 0.15151857 | -0.0131389 | 0.16335788 | -0.1090408 | -0.0821399 |
| -0.236963  | 0.13959856 | 0.20077548 | 0.06239639 | 0.00399561 | 0.04829432 | -0.1798038 |
| 0.13075637 | -0.2542779 | 0.0498518  | 0.14959259 | 0.01518635 | 0.07295675 | 0.06047862 |
| 0.09977365 | -0.168547  | -0.0380812 | 0.55177179 | -0.2046714 | 0.01940778 | 0.58358604 |
| -0.0586218 | 0.136992   | -0.0010169 | 0.1300219  | -0.3575428 | -0.0100158 | 0.17223613 |
| 0.23279365 | -0.152004  | 0.09682226 | 0.29961575 | -0.2639404 | -0.0069981 | 0.5864994  |
| 0.06479976 | -0.0622331 | -0.0725998 | 0.52848026 | -0.0450806 | -0.0014273 | 0.03128378 |
| -0.0819367 | -0.0543223 | 0.05374414 | 0.16374266 | 0.09996635 | -0.0587584 | -0.0626701 |
| 0.05802648 | -0.03862   | -0.1206216 | -0.1718209 | -0.0471344 | -0.0888356 | 0.04157649 |
| 0.0771467  | -0.0258044 | -0.0377497 | 0.52373896 | -0.0272587 | -0.0022158 | -0.0205669 |
| -0.0140053 | -0.0087114 | -0.0364109 | 0.06036387 | -0.0620882 | 0.11551192 | 0.05252742 |
| 0.09658088 | -0.037438  | -0.0445905 | 0.52073377 | -0.0158394 | -0.0004628 | -0.0108518 |
| 0.05174028 | -0.0105695 | -0.0466203 | 0.26084227 | -0.39737   | -0.0246174 | 0.46798953 |
| 0.05618786 | 0.09778553 | 0.00941359 | -0.0461225 | 0.09561967 | -0.042039  | -0.0703605 |
| -0.0997663 | -0.2937454 | -0.2332084 | 0.08698709 | -0.0903474 | 0.15564377 | 0.17891976 |
| 0.45190615 | -0.0885928 | -0.0338692 | 0.25136283 | -0.2541938 | -0.0661098 | 0.40667086 |
| 0.04220748 | 0.28905901 | 0.0845879  | -0.0498514 | 0.15614811 | -0.0673619 | -0.1278558 |
| 0.03740769 | 0.0305378  | -0.1437357 | -0.0145987 | -0.310168  | 0.02137435 | 0.14255246 |
| -0.0311878 | 0.01157215 | -0.0589473 | -0.0278481 | 0.06602863 | 0.03241509 | 0.04826549 |
| -0.1185252 | -0.0703266 | -0.0355825 | 0.06292317 | -0.2355939 | -0.0024364 | 0.14217043 |
| 0.33926966 | -0.1512548 | -0.0445173 | 0.24408015 | -0.1861062 | -0.0442577 | 0.45652874 |
| -0.1443878 | -0.0205932 | 0.07805209 | 0.20736782 | 0.1907993  | 0.03815046 | -0.0255541 |
| -0.0237674 | 0.0666859  | -0.0170975 | 0.00085993 | -0.0124747 | 0.05192187 | 0.01455881 |
| 0.14615864 | -0.0905919 | -0.0231514 | 0.4016315  | -0.3287432 | -0.012371  | 0.51644211 |
| -0.017595  | -0.1349214 | -0.098053  | 0.09496482 | -0.1888221 | 0.07155706 | 0.29045678 |
| -0.0062888 | 0.07591686 | 0.00188443 | -0.0105086 | -0.0062211 | 0.04368936 | 0.05298595 |
| 0.12349254 | -0.2215697 | -0.0430086 | 0.38542909 | -0.281646  | 0.01525333 | 0.62027032 |
| -0.2165928 | 0.00171484 | -0.1370874 | -0.0166559 | -0.1724961 | 0.20643933 | 0.15242244 |

0.18720512 0.15167801 -0.1159945 -0.2289291 0.14342416 -0.0813281 -0.1570208  
0.01511576 -0.0472341 0.03156742 -0.1265229 0.06521577 -0.0090893 0.06170643  
0.00950942 -0.1545023 0.03403505 0.20470272 -0.136454 0.06086393 0.04307571  
0.07923807 -0.0250404 -0.0399192 0.52478 -0.0244848 -0.0022638 -0.0231245  
-0.1153263 0.0730931 -0.1928381 -0.1700182 0.40676393 -0.0211661 0.04956101  
-0.0007135 0.22521357 0.03566595 -0.139966 0.16892974 -0.0799467 -0.1146425  
0.07874436 -0.0263998 -0.0387512 0.5288043 -0.0294788 -0.0023431 -0.0163926  
0.09943393 0.08094604 -0.1125661 -0.0340611 -0.1150479 0.02477657 0.13720689  
-0.0806215 0.01395011 -0.0613283 -0.0342974 -0.0106936 0.1258256 0.12566021  
-0.2253568 -0.023419 -0.010089 0.18904254 -0.1791798 0.25888894 0.17964953  
0.32055371 -0.0375902 0.07718155 0.25898407 -0.2970308 -0.0626125 0.38468908  
0.16795848 -0.1263646 -0.0715954 0.32216294 -0.1956922 -0.0150902 0.54950283  
0.02363279 0.08816373 -0.2193242 0.05053849 0.04358726 -0.0385574 0.02573618  
-0.1491374 -0.1044161 -0.1484185 0.20221083 -0.2207458 0.06190982 0.22309543  
0.07915658 -0.0288915 -0.037836 0.52801219 -0.0267039 -0.0001732 -0.0176963  
0.0641418 0.00628156 -0.0009544 0.3008154 -0.2679475 0.08750672 0.20599089  
0.06380785 0.01258192 -0.0519982 -0.1057345 -0.0287029 0.04387513 -0.0986568  
0.00830455 0.02249648 0.04405628 0.1786331 -0.1360759 0.01598313 0.32722752  
0.07719417 -0.1050449 -0.0218584 0.26440035 -0.3259923 0.00343876 0.50130565  
0.38572463 0.08326962 0.05433059 -0.114645 -0.1976467 -0.0414237 0.05156682  
0.18351501 -0.2091088 -0.1224662 0.054687 -0.2096215 -0.0241348 0.32316909  
0.02165728 0.14628734 -0.0014839 0.15925977 0.13537348 -0.0229897 -0.0162169  
0.27441249 -0.1610945 -0.0513565 0.22815961 -0.1508233 -0.0270785 0.41740453  
-0.0347746 -0.0528517 -0.182184 -0.1092552 0.00289436 -0.0246191 0.04712412  
0.15852175 0.21064747 0.02793373 -0.1352696 -0.0255811 -0.0843932 -0.227708  
0.03404751 -0.105966 -0.1313542 0.04257302 -0.2835496 0.04259748 0.07712442  
0.12540973 0.00352668 -0.0824305 -0.0857437 0.04435819 -0.0113781 -0.0311434  
0.23967214 -0.1300301 0.01911847 0.13835231 -0.3445525 -0.0174047 0.23269867

| GK2        | ACOX3      | UBC        | NR1H3      | ACSL5      | DBI        | FABP1      |
|------------|------------|------------|------------|------------|------------|------------|
| 0.02048176 | 0.01573885 | 0.47351863 | 0.2573668  | -0.0236537 | -0.1103342 | -0.2579715 |
| -0.000965  | 0.10236799 | 0.02879384 | -0.0161351 | -0.0476122 | -0.0179904 | -0.0261851 |
| -0.0330438 | -0.0878719 | -0.3326499 | -0.1280569 | -0.2494405 | 0.18980618 | 0.85480117 |
| 0.04218702 | -0.1911023 | -0.0940304 | -0.141598  | -0.0716529 | -0.0053111 | -0.0976665 |
| -0.0406508 | -0.0735226 | -0.3282984 | -0.1938236 | -0.250804  | 0.22205818 | 0.81023099 |
| -0.0302085 | -0.0799165 | 0.28326051 | 0.27662187 | 0.08403133 | -0.0555311 | -0.1626149 |
| -0.058529  | -0.1841377 | 0.04025506 | 0.30438765 | -0.236963  | 0.13075637 | 0.09977365 |
| -0.0117554 | -0.0524305 | 0.12412495 | 0.07352819 | 0.13959856 | -0.2542779 | -0.168547  |
| -0.0369056 | 0.08696495 | 0.09263961 | 0.15151857 | 0.20077548 | 0.0498518  | -0.0380812 |
| 0.00023304 | 0.11289699 | -0.1266433 | -0.0131389 | 0.06239639 | 0.14959259 | 0.55177179 |
| 0.00045586 | 0.06137453 | 0.16037993 | 0.16335788 | 0.00399561 | 0.01518635 | -0.2046714 |
| 0.02062496 | -0.0450073 | -0.0893609 | -0.1090408 | 0.04829432 | 0.07295675 | 0.01940778 |
| 0.16784915 | -0.0532691 | -0.220428  | -0.0821399 | -0.1798038 | 0.06047862 | 0.58358604 |
| 1          | 0.00019757 | -0.0250577 | -0.0043467 | -0.0469405 | -0.0142    | -0.0096616 |
| 0.00019757 | 1          | -0.0024535 | 0.05770118 | 0.20587025 | 0.08534792 | -0.0397704 |
| -0.0250577 | -0.0024535 | 1          | 0.2672722  | 0.09471997 | -0.1454408 | -0.3233042 |
| -0.0043467 | 0.05770118 | 0.2672722  | 1          | 0.09773035 | 0.05131898 | -0.158     |
| -0.0469405 | 0.20587025 | 0.09471997 | 0.09773035 | 1          | -0.1545328 | -0.1831888 |
| -0.0142    | 0.08534792 | -0.1454408 | 0.05131898 | -0.1545328 | 1          | 0.18699024 |
| -0.0096616 | -0.0397704 | -0.3233042 | -0.158     | -0.1831888 | 0.18699024 | 1          |
| -0.078763  | 0.03383292 | -0.2952075 | -0.2535905 | 0.0632745  | -0.0859153 | 0.15934949 |
| -0.0114703 | -0.1255172 | -0.3324658 | -0.1463097 | -0.190232  | 0.24509102 | 0.66449228 |
| 0.06215254 | 0.02465214 | -0.0497039 | -0.0053908 | -0.0437683 | 0.07601869 | 0.40304718 |
| 0.04175902 | 0.18682381 | 0.20844787 | 0.32146109 | 0.08335427 | 0.18803409 | -0.1309436 |
| 0.00634429 | -0.1070396 | -0.0120366 | 0.03653858 | -0.0554514 | -0.1670699 | -0.0542567 |
| 0.04861185 | 0.01681661 | -0.022787  | -0.0123676 | -0.0080923 | 0.0532029  | 0.38323767 |
| 0.00439849 | -0.0062884 | -0.118556  | -0.0394489 | -0.0610417 | 0.31476991 | 0.0360608  |
| 0.04728706 | 0.00319859 | -0.0224597 | -0.0142023 | -0.0074159 | 0.06759778 | 0.37325621 |
| -0.0569037 | 0.00856304 | -0.4207249 | -0.2467287 | -0.1446254 | 0.06056762 | 0.48475099 |
| 0.022325   | -0.0052039 | 0.11584938 | 0.14105746 | 0.01617016 | -0.0095344 | -0.1118676 |
| 0.01123982 | 0.08273583 | -0.358463  | -0.3390428 | -0.2345646 | 0.30411699 | 0.25745692 |
| -0.0731745 | -0.2429669 | -0.2099755 | -0.0754525 | -0.2001674 | 0.06378386 | 0.46978271 |
| -0.0588936 | -0.0182869 | 0.23939449 | 0.4210588  | 0.06560311 | -0.0222816 | -0.232735  |
| -0.0305515 | -0.0601243 | -0.2104833 | -0.2904786 | -0.0873893 | -0.0889261 | 0.19689188 |
| 0.02325238 | -4.06E-05  | -0.0694075 | -0.083869  | -0.0253122 | 0.07136621 | -0.0280171 |
| -0.0672056 | -0.0592648 | -0.1716049 | -0.3941508 | -0.0335097 | -0.0297333 | 0.18252468 |
| -0.0302792 | -0.1755781 | -0.1672667 | -0.0486805 | -0.2155713 | 0.00153561 | 0.54987831 |
| -0.0290751 | 0.38221043 | 0.08549498 | 0.15255874 | 0.09195236 | 0.2134437  | -0.066261  |
| -0.0171898 | -0.0337969 | -0.036426  | -0.0020537 | 0.000605   | 0.00261    | 0.0018842  |
| -0.0338391 | 0.00796176 | -0.3696074 | -0.2501288 | -0.0959778 | 0.18928517 | 0.67247091 |
| 0.00740594 | -0.0134249 | -0.1571515 | -0.2006914 | -0.1047834 | 0.09947823 | 0.25406348 |
| -0.0148037 | -0.0132533 | 0.03409116 | 0.05505884 | 0.00326523 | -0.0036607 | -0.0268314 |
| -0.0385671 | -0.0368549 | -0.3559579 | -0.195711  | -0.2016014 | 0.23443048 | 0.84790783 |
| -0.0294592 | -0.0203171 | -0.2937403 | -0.460582  | 0.01576347 | 0.05733786 | 0.19831958 |

-0.0464736 -0.2553432 0.19853436 0.07908083 -0.0356338 -0.2813209 -0.1808562  
0.11557261 -0.0870607 0.0716317 0.15230791 -0.0220694 -0.101452 -0.1224938  
-0.019817 0.04394392 -0.152008 -0.0065 -0.188854 0.30904835 0.17952394  
0.04914166 0.01484196 -0.0208844 -0.0135496 -0.0066858 0.05087285 0.38030959  
0.07540538 -0.0164598 0.1005032 0.04209589 -0.0052309 -0.1766026 -0.1994793  
0.00798342 -0.1115497 0.20908139 0.00547869 0.07727887 -0.220375 -0.1766836  
0.04730657 0.01816532 -0.0265638 -0.0102207 -0.0073979 0.05880653 0.39057686  
0.05935533 -0.1816486 -0.0866998 -0.0145377 -0.03142 -0.0699712 0.03884061  
0.040691 -0.0025325 -0.0820008 -0.0687487 -0.0008109 0.00510588 -0.0365112  
-0.0186805 -0.0097384 -0.3687049 -0.3981857 0.06482465 0.08840804 0.33811869  
-0.1102459 -0.1688503 -0.1628691 -0.0564709 -0.0692491 0.06196618 0.43047338  
-0.0347652 -0.1187252 -0.289989 -0.1549849 -0.223615 0.07613421 0.71844973  
-0.0497552 -0.0054839 0.10511076 0.16280249 -0.0030156 -0.1426042 0.08172533  
0.03108603 0.0440125 -0.2957507 -0.1970979 -0.1575179 0.17346879 0.2635378  
0.04815726 0.01521748 -0.0254349 -0.0127584 -0.0092887 0.05541793 0.39085103  
-0.0839023 -0.121471 -0.3117593 -0.3027089 -0.0172292 0.16216764 0.43057947  
-0.0408163 0.00592243 0.13682302 0.17146549 -0.1255928 -0.0272912 -0.1837687  
0.0211392 0.07198949 -0.2082758 -0.0933736 -0.0352101 0.08490576 0.2284763  
-0.0572382 -0.1078486 -0.3819734 -0.2623973 -0.1351458 0.14099462 0.63346184  
0.01079019 -0.2954645 0.07764847 0.07704141 -0.085304 -0.1076926 -0.1041191  
-0.0208671 -0.1640245 -0.2153518 -0.0924024 -0.2618909 0.18775573 0.3510399  
-0.0201937 0.03214053 0.19305169 0.15353886 -0.0330084 -0.0393698 -0.0437291  
-0.0298364 -0.1639779 -0.1457882 -0.0712555 -0.1955073 0.02847672 0.5962217  
-0.0467312 -0.0567313 -0.1601486 -0.2024646 -0.1424814 -0.0865682 0.04361083  
-0.0825127 -0.0712062 0.09350692 0.08590147 0.08055969 -0.1917837 -0.158682  
-0.0233753 -0.0193893 -0.2491293 -0.2427029 -0.1870279 0.18789187 0.20953387  
-0.0390233 -0.1510303 0.06139075 0.07116214 -0.0885006 -0.0712047 -0.0271895  
-0.1058525 -0.0372042 -0.2310545 -0.1532974 -0.0819969 0.15950951 0.33572287

| PDPK1      | GK         | SLC27A5    | FABP6      | RXRB       | APOA5      | PLIN4      |
|------------|------------|------------|------------|------------|------------|------------|
| -0.3961516 | -0.2881527 | -0.0561427 | 0.34527758 | -0.0444228 | -0.0428588 | -0.0843185 |
| -0.0964069 | -0.0465161 | -0.0120759 | 0.01443056 | -0.0362883 | -0.0039477 | -0.0045751 |
| 0.24170278 | 0.767012   | 0.13759091 | -0.1628133 | -0.0200656 | 0.11322572 | 0.03346701 |
| 0.08831051 | 0.0694413  | 0.01440373 | -0.2422451 | -0.0315142 | -0.0135774 | 0.15508783 |
| 0.29469209 | 0.73107896 | 0.16134863 | -0.150421  | 0.03598232 | 0.14082019 | 0.08976907 |
| 0.0128224  | 0.0695314  | -0.0755516 | 0.11854659 | -0.0161433 | -0.0408087 | -0.0310618 |
| -0.0586218 | 0.23279365 | 0.06479976 | -0.0819367 | 0.05802648 | 0.0771467  | -0.0140053 |
| 0.136992   | -0.152004  | -0.0622331 | -0.0543223 | -0.03862   | -0.0258044 | -0.0087114 |
| -0.0010169 | 0.09682226 | -0.0725998 | 0.05374414 | -0.1206216 | -0.0377497 | -0.0364109 |
| 0.1300219  | 0.29961575 | 0.52848026 | 0.16374266 | -0.1718209 | 0.52373896 | 0.06036387 |
| -0.3575428 | -0.2639404 | -0.0450806 | 0.09996635 | -0.0471344 | -0.0272587 | -0.0620882 |
| -0.0100158 | -0.0069981 | -0.0014273 | -0.0587584 | -0.0888356 | -0.0022158 | 0.11551192 |
| 0.17223613 | 0.5864994  | 0.03128378 | -0.0626701 | 0.04157649 | -0.0205669 | 0.05252742 |
| -0.078763  | -0.0114703 | 0.06215254 | 0.04175902 | 0.00634429 | 0.04861185 | 0.00439849 |
| 0.03383292 | -0.1255172 | 0.02465214 | 0.18682381 | -0.1070396 | 0.01681661 | -0.0062884 |
| -0.2952075 | -0.3324658 | -0.0497039 | 0.20844787 | -0.0120366 | -0.022787  | -0.118556  |
| -0.2535905 | -0.1463097 | -0.0053908 | 0.32146109 | 0.03653858 | -0.0123676 | -0.0394489 |
| 0.0632745  | -0.190232  | -0.0437683 | 0.08335427 | -0.0554514 | -0.0080923 | -0.0610417 |
| -0.0859153 | 0.24509102 | 0.07601869 | 0.18803409 | -0.1670699 | 0.0532029  | 0.31476991 |
| 0.15934949 | 0.66449228 | 0.40304718 | -0.1309436 | -0.0542567 | 0.38323767 | 0.0360608  |
| 1          | 0.35189862 | -0.0697533 | -0.2673727 | 0.10343228 | -0.0507951 | 0.04211035 |
| 0.35189862 | 1          | -0.0028215 | -0.158173  | -0.0451591 | -0.0196234 | 0.08817505 |
| -0.0697533 | -0.0028215 | 1          | -0.0086522 | -0.0615621 | 0.98641924 | 0.02644762 |
| -0.2673727 | -0.158173  | -0.0086522 | 1          | -0.2415525 | -0.0268269 | -0.0462104 |
| 0.10343228 | -0.0451591 | -0.0615621 | -0.2415525 | 1          | -0.0678787 | 0.01879779 |
| -0.0507951 | -0.0196234 | 0.98641924 | -0.0268269 | -0.0678787 | 1          | 0.01540626 |
| 0.04211035 | 0.08817505 | 0.02644762 | -0.0462104 | 0.01879779 | 0.01540626 | 1          |
| -0.0530356 | 0.00459354 | 0.95924035 | -0.0320631 | -0.0503631 | 0.96051244 | 0.02026276 |
| 0.66326285 | 0.62049733 | 0.04610786 | -0.282832  | 0.1058187  | 0.03823888 | 0.0950314  |
| -0.159844  | -0.1050123 | -0.0431014 | 0.07628355 | 0.0265939  | -0.0221185 | -0.0587109 |
| 0.1326506  | 0.23755639 | 0.12576819 | -0.1691579 | -0.0627965 | 0.06131702 | 0.1747278  |
| 0.32285447 | 0.65328847 | -0.0176858 | -0.216954  | 0.0567503  | -0.0143523 | -0.0204359 |
| -0.0584612 | -0.2171107 | -0.0559214 | 0.18867954 | -0.1901071 | -0.0200478 | -0.0083439 |
| 0.53451276 | 0.35659852 | 0.01785008 | -0.324743  | 0.18998727 | 0.01278294 | 0.04311345 |
| 0.07249355 | -0.0427297 | 0.01151122 | -0.041023  | -0.0493097 | 0.00287899 | 0.05422147 |
| 0.20309141 | 0.08774444 | -0.0147139 | -0.244843  | 0.17753277 | -0.0276963 | -0.0318252 |
| 0.17238981 | 0.59543165 | 0.01401849 | -0.1606455 | 0.0874521  | 0.00677787 | -0.0220407 |
| -0.1045087 | -0.1467426 | -0.0225812 | 0.28210273 | -0.2158848 | -0.0206594 | 0.13604773 |
| -0.0066714 | -0.0167904 | -0.0044904 | -0.0414263 | 0.07738196 | -0.0056274 | 0.72382834 |
| 0.48835636 | 0.72126803 | 0.17541931 | -0.2265779 | -0.05791   | 0.16587548 | 0.07658004 |
| 0.21963924 | 0.28894502 | 0.01089208 | -0.0974155 | -0.0141459 | -0.0080754 | 0.02174535 |
| -0.0236173 | -0.0307008 | -0.0086328 | -0.0113334 | 0.13061422 | -0.0111625 | 0.69426505 |
| 0.23785251 | 0.71621613 | 0.07628961 | -0.1406928 | 0.05507075 | 0.04545569 | 0.06361939 |
| 0.48840924 | 0.30531437 | -0.0152936 | -0.3188759 | -0.1238212 | -0.0248921 | 0.04858085 |

-0.0489194 -0.1241945 -0.0741556 -0.1586668 0.13373229 -0.0343513 -0.0099858  
-0.0623126 -0.0164184 0.01135652 0.00641277 0.38660604 -0.0112193 0.04507786  
0.02858293 0.16442241 0.14975863 0.19824273 -0.1462335 0.12064331 0.28498566  
-0.0517694 -0.017968 0.98665144 -0.0280614 -0.0616496 0.99866232 0.01467102  
-0.2859204 -0.3291387 -0.0201331 0.0412429 0.19289109 -0.0343144 0.00986983  
-0.1873896 -0.2649914 -0.0817524 -0.0986329 0.31176169 -0.0488941 -0.0492755  
-0.050888 -0.0140707 0.98515037 -0.0265443 -0.0699747 0.99904203 0.01839934  
0.01694897 0.07556948 0.03406673 -0.168298 0.14994362 0.00313095 0.32030322  
0.02449391 -0.0440747 0.02631759 -0.0780723 0.05231924 0.00256411 0.45629187  
0.27987944 0.31883356 -0.0123032 -0.2382013 -0.1059037 -0.0202137 -0.0021906  
0.44999543 0.63092969 -0.0269802 -0.1535299 -0.0097609 -0.0069905 -0.0042647  
0.24720524 0.68268352 0.0337022 -0.1873026 0.00846046 0.01395583 0.00748653  
0.09600098 -0.0177631 0.05391468 0.00855645 0.07920528 0.06129128 0.06481919  
0.19612437 0.2506811 0.19473265 -0.0541346 0.02384128 0.14028938 0.31735647  
-0.0512056 -0.0132095 0.98656091 -0.0268318 -0.0679098 0.99910596 0.01544716  
0.44260964 0.48734995 0.19153227 -0.208287 -0.1791415 0.20594628 0.04594787  
-0.0767298 -0.2023821 0.06375105 -0.0322026 0.19347327 0.02972371 0.13657536  
0.16933558 0.27744199 0.00518459 -0.0287128 -0.0680952 -0.0077995 0.08047511  
0.5177654 0.71778759 -0.0089324 -0.2374463 -0.0008894 -0.0217507 0.01599964  
0.22153392 0.24702118 -0.0476292 -0.090013 0.19784703 -0.0369347 -0.0347974  
0.19992519 0.4784595 0.03536389 -0.1527615 0.20236609 0.00551434 0.22703706  
-0.1306676 -0.1534821 0.22746567 0.09483721 -0.1231777 0.24082728 -0.0085154  
0.1226438 0.5532881 0.03209363 -0.1441352 0.07860151 0.0219847 0.01458283  
0.18942755 0.05477481 -0.0330385 -0.2359198 0.12970406 -0.0345059 0.22227859  
0.20479871 -0.0698671 -0.0844123 -0.2740769 0.34880556 -0.050118 -0.0546927  
0.45231593 0.35901683 0.08966851 -0.2323014 0.00047879 0.07818787 0.16883438  
-0.0590075 -0.0226987 -0.0133703 -0.109239 0.10773424 -0.0104955 0.28354831  
0.48247585 0.4805087 -0.0315809 -0.1810493 0.06889978 -0.025591 0.11211748



| APOA2      | PPARA      | FABP7      | SLC27A4    | SLC27A2    | SCD        | CPT1A      |
|------------|------------|------------|------------|------------|------------|------------|
| -0.0426137 | -0.3916332 | 0.17461914 | -0.3749133 | -0.1207742 | 0.22003117 | -0.2358797 |
| -0.0052138 | -0.0849679 | -0.0106361 | -0.0259574 | -0.0600194 | 0.00911221 | -0.0832411 |
| 0.11168736 | 0.57326176 | -0.1343003 | 0.25915954 | 0.65920175 | -0.2194823 | 0.22665495 |
| -0.0007511 | 0.16937544 | -0.0508516 | 0.18595965 | 0.07559305 | -0.1536681 | 0.3250108  |
| 0.14225503 | 0.59576735 | -0.1166141 | 0.24074672 | 0.62884401 | -0.2495347 | 0.25053133 |
| -0.0089136 | -0.0276388 | 0.04832058 | -0.3194843 | 0.16221768 | 0.28359116 | 0.0713875  |
| 0.09658088 | 0.05174028 | 0.05618786 | -0.0997663 | 0.45190615 | 0.04220748 | 0.03740769 |
| -0.037438  | -0.0105695 | 0.09778553 | -0.2937454 | -0.0885928 | 0.28905901 | 0.0305378  |
| -0.0445905 | -0.0466203 | 0.00941359 | -0.2332084 | -0.0338692 | 0.0845879  | -0.1437357 |
| 0.52073377 | 0.26084227 | -0.0461225 | 0.08698709 | 0.25136283 | -0.0498514 | -0.0145987 |
| -0.0158394 | -0.39737   | 0.09561967 | -0.0903474 | -0.2541938 | 0.15614811 | -0.310168  |
| -0.0004628 | -0.0246174 | -0.042039  | 0.15564377 | -0.0661098 | -0.0673619 | 0.02137435 |
| -0.0108518 | 0.46798953 | -0.0703605 | 0.17891976 | 0.40667086 | -0.1278558 | 0.14255246 |
| 0.04728706 | -0.0569037 | 0.022325   | 0.01123982 | -0.0731745 | -0.0588936 | -0.0305515 |
| 0.00319859 | 0.00856304 | -0.0052039 | 0.08273583 | -0.2429669 | -0.0182869 | -0.0601243 |
| -0.0224597 | -0.4207249 | 0.11584938 | -0.358463  | -0.2099755 | 0.23939449 | -0.2104833 |
| -0.0142023 | -0.2467287 | 0.14105746 | -0.3390428 | -0.0754525 | 0.4210588  | -0.2904786 |
| -0.0074159 | -0.1446254 | 0.01617016 | -0.2345646 | -0.2001674 | 0.06560311 | -0.0873893 |
| 0.06759778 | 0.06056762 | -0.0095344 | 0.30411699 | 0.06378386 | -0.0222816 | -0.0889261 |
| 0.37325621 | 0.48475099 | -0.1118676 | 0.25745692 | 0.46978271 | -0.232735  | 0.19689188 |
| -0.0530356 | 0.66326285 | -0.159844  | 0.1326506  | 0.32285447 | -0.0584612 | 0.53451276 |
| 0.00459354 | 0.62049733 | -0.1050123 | 0.23755639 | 0.65328847 | -0.2171107 | 0.35659852 |
| 0.95924035 | 0.04610786 | -0.0431014 | 0.12576819 | -0.0176858 | -0.0559214 | 0.01785008 |
| -0.0320631 | -0.282832  | 0.07628355 | -0.1691579 | -0.216954  | 0.18867954 | -0.324743  |
| -0.0503631 | 0.1058187  | 0.0265939  | -0.0627965 | 0.0567503  | -0.1901071 | 0.18998727 |
| 0.96051244 | 0.03823888 | -0.0221185 | 0.06131702 | -0.0143523 | -0.0200478 | 0.01278294 |
| 0.02026276 | 0.0950314  | -0.0587109 | 0.1747278  | -0.0204359 | -0.0083439 | 0.04311345 |
| 1          | 0.0368693  | -0.0310035 | 0.0611777  | -0.0061447 | -0.0289102 | 0.02004353 |
| 0.0368693  | 1          | -0.1737538 | 0.26548484 | 0.51201397 | -0.1838227 | 0.62283171 |
| -0.0310035 | -0.1737538 | 1          | -0.2058197 | -0.0857059 | 0.11632969 | -0.1430895 |
| 0.0611777  | 0.26548484 | -0.2058197 | 1          | 0.05425318 | -0.3623418 | 0.36486762 |
| -0.0061447 | 0.51201397 | -0.0857059 | 0.05425318 | 1          | -0.1320312 | 0.28659764 |
| -0.0289102 | -0.1838227 | 0.11632969 | -0.3623418 | -0.1320312 | 1          | -0.2337433 |
| 0.02004353 | 0.62283171 | -0.1430895 | 0.36486762 | 0.28659764 | -0.2337433 | 1          |
| 0.00211836 | 0.099696   | -0.0273808 | 0.05249321 | -0.0822185 | 0.00475733 | 0.09648458 |
| -0.0320114 | 0.21762598 | -0.1127607 | 0.16553642 | 0.0670449  | -0.3741189 | 0.14637511 |
| 0.02290202 | 0.43183722 | -0.0853304 | 0.08432717 | 0.65754815 | -0.1805204 | 0.34306493 |
| -0.0279738 | -0.2132689 | -0.0067429 | -0.031876  | -0.2634707 | 0.16748471 | -0.3248837 |
| -0.0075775 | -0.003056  | -0.0128814 | 0.0318938  | -0.0209612 | 0.03716563 | 0.00619604 |
| 0.16383426 | 0.73265337 | -0.156466  | 0.31906696 | 0.62574359 | -0.2170518 | 0.49906041 |
| 0.00845393 | 0.30874274 | -0.0639907 | 0.24555024 | 0.24721659 | -0.1531285 | 0.21417477 |
| -0.0119421 | -0.0212231 | -0.0044885 | -0.0296897 | -0.0373353 | 0.10586269 | -0.0158219 |
| 0.05235568 | 0.54439581 | -0.1185497 | 0.31558194 | 0.54202699 | -0.3149412 | 0.26881051 |
| -0.0274009 | 0.4622176  | -0.175219  | 0.49580964 | 0.11315479 | -0.1461098 | 0.52106842 |

-0.0417483 -0.1006801 0.11686671 -0.3148238 0.18890431 0.10967385 0.07616843  
-0.0112691 -0.0262564 0.0138693 0.01390877 -0.105458 -0.0691895 0.08752712  
0.13366538 0.16152127 -0.1489943 0.21277037 0.05362021 -0.0362563 0.13795201  
0.97206277 0.03736971 -0.0221834 0.05830428 -0.0153518 -0.0233061 0.01449346  
-0.0347744 -0.301303 0.02409561 -0.0506403 -0.2211701 0.09748564 -0.231766  
-0.0552089 -0.2194195 0.01773388 -0.2378303 -0.0867545 -0.040793 -0.1687423  
0.95876266 0.04377385 -0.0215565 0.06231159 -0.0116502 -0.0201346 0.01129402  
0.08275227 0.08055902 -0.0500522 0.12986009 0.11634514 -0.0913875 0.16477525  
0.00394821 0.04868627 -0.0447642 0.10726174 -0.0938207 -0.0108739 0.03992784  
-0.0204503 0.26856185 -0.1714888 0.35118832 0.1503016 -0.2107724 0.17120575  
0.00035431 0.55961581 -0.081714 -0.0437913 0.7268075 -0.0135828 0.34454291  
0.01366705 0.53954883 -0.1261 0.21450197 0.65133929 -0.2174037 0.28962123  
0.04674271 0.04995552 -0.015004 -0.0510975 0.093516 0.08902117 -0.0345193  
0.13521315 0.3531784 -0.1461062 0.52534674 0.00962408 -0.1892337 0.31145879  
0.96765219 0.03995982 -0.0233392 0.062287 -0.0115663 -0.0216687 0.01275631  
0.22162568 0.46069829 -0.0905132 0.13171889 0.45474735 -0.0919671 0.34027946  
0.03956784 -0.1042891 -0.012883 0.02219314 -0.083448 -0.0214508 -0.0180998  
9.03E-07 0.306813 -0.0631199 0.06910201 0.27763672 -0.0908414 0.05860721  
-0.0018972 0.67706036 -0.1431859 0.22997587 0.61623085 -0.2047406 0.485364  
-0.004639 0.22204614 0.03538034 -0.1714476 0.32518065 0.02531975 0.35218742  
0.00370952 0.44576262 -0.1356263 0.26067661 0.41325381 -0.2009649 0.38412159  
0.23772405 -0.1374748 0.11182476 -0.0906871 -0.1272499 0.27999836 -0.1177437  
0.04018466 0.37672357 -0.0709048 0.08977055 0.54390131 -0.177295 0.31005542  
-0.0338204 0.28734322 -0.0942233 0.16081232 0.07356572 -0.1195785 0.26896304  
-0.0354243 0.05991324 0.0564761 -0.2043861 0.18509192 0.03796403 0.17146797  
0.09415509 0.57048128 -0.1807074 0.41388019 0.22928551 -0.0977896 0.65885275  
-0.0140474 -0.0026014 0.06651062 -0.0250409 0.14174933 -0.0041664 0.10024328  
-0.0055582 0.56017079 -0.1117458 0.20527716 0.56627954 -0.1336247 0.52924282

| ACSBG1     | SCD5       | CYP4A11    | PLTP       | ADIPOQ     | ACOX1      | ACSL6      |
|------------|------------|------------|------------|------------|------------|------------|
| -0.0668969 | -0.268243  | -0.0513418 | 0.09527797 | -0.0591563 | -0.3617371 | -0.2341075 |
| -0.0104311 | -0.0314069 | -0.0389765 | 0.02242799 | -0.0071935 | -0.076246  | -0.0359063 |
| -0.0241919 | 0.18057151 | 0.64246509 | -0.098961  | -0.0173237 | 0.73917787 | 0.30982154 |
| 0.08818939 | -0.0733852 | 0.07066137 | -0.2578443 | 0.01531389 | 0.05958804 | 0.03205997 |
| -0.0420459 | 0.22043423 | 0.61015763 | -0.0845911 | 0.00564303 | 0.70378269 | 0.30853388 |
| -0.086278  | -0.2740956 | 0.22861613 | -0.1302079 | -0.0391242 | 0.0153479  | -0.1248066 |
| -0.0311878 | -0.1185252 | 0.33926966 | -0.1443878 | -0.0237674 | 0.14615864 | -0.017595  |
| 0.01157215 | -0.0703266 | -0.1512548 | -0.0205932 | 0.0666859  | -0.0905919 | -0.1349214 |
| -0.0589473 | -0.0355825 | -0.0445173 | 0.07805209 | -0.0170975 | -0.0231514 | -0.098053  |
| -0.0278481 | 0.06292317 | 0.24408015 | 0.20736782 | 0.00085993 | 0.4016315  | 0.09496482 |
| 0.06602863 | -0.2355939 | -0.1861062 | 0.1907993  | -0.0124747 | -0.3287432 | -0.1888221 |
| 0.03241509 | -0.0024364 | -0.0442577 | 0.03815046 | 0.05192187 | -0.012371  | 0.07155706 |
| 0.04826549 | 0.14217043 | 0.45652874 | -0.0255541 | 0.01455881 | 0.51644211 | 0.29045678 |
| 0.02325238 | -0.0672056 | -0.0302792 | -0.0290751 | -0.0171898 | -0.0338391 | 0.00740594 |
| -4.06E-05  | -0.0592648 | -0.1755781 | 0.38221043 | -0.0337969 | 0.00796176 | -0.0134249 |
| -0.0694075 | -0.1716049 | -0.1672667 | 0.08549498 | -0.036426  | -0.3696074 | -0.1571515 |
| -0.083869  | -0.3941508 | -0.0486805 | 0.15255874 | -0.0020537 | -0.2501288 | -0.2006914 |
| -0.0253122 | -0.0335097 | -0.2155713 | 0.09195236 | 0.000605   | -0.0959778 | -0.1047834 |
| 0.07136621 | -0.0297333 | 0.00153561 | 0.2134437  | 0.00261    | 0.18928517 | 0.09947823 |
| -0.0280171 | 0.18252468 | 0.54987831 | -0.066261  | 0.0018842  | 0.67247091 | 0.25406348 |
| 0.07249355 | 0.20309141 | 0.17238981 | -0.1045087 | -0.0066714 | 0.48835636 | 0.21963924 |
| -0.0427297 | 0.08774444 | 0.59543165 | -0.1467426 | -0.0167904 | 0.72126803 | 0.28894502 |
| 0.01151122 | -0.0147139 | 0.01401849 | -0.0225812 | -0.0044904 | 0.17541931 | 0.01089208 |
| -0.041023  | -0.244843  | -0.1606455 | 0.28210273 | -0.0414263 | -0.2265779 | -0.0974155 |
| -0.0493097 | 0.17753277 | 0.0874521  | -0.2158848 | 0.07738196 | -0.05791   | -0.0141459 |
| 0.00287899 | -0.0276963 | 0.00677787 | -0.0206594 | -0.0056274 | 0.16587548 | -0.0080754 |
| 0.05422147 | -0.0318252 | -0.0220407 | 0.13604773 | 0.72382834 | 0.07658004 | 0.02174535 |
| 0.00211836 | -0.0320114 | 0.02290202 | -0.0279738 | -0.0075775 | 0.16383426 | 0.00845393 |
| 0.099696   | 0.21762598 | 0.43183722 | -0.2132689 | -0.003056  | 0.73265337 | 0.30874274 |
| -0.0273808 | -0.1127607 | -0.0853304 | -0.0067429 | -0.0128814 | -0.156466  | -0.0639907 |
| 0.05249321 | 0.16553642 | 0.08432717 | -0.031876  | 0.0318938  | 0.31906696 | 0.24555024 |
| -0.0822185 | 0.0670449  | 0.65754815 | -0.2634707 | -0.0209612 | 0.62574359 | 0.24721659 |
| 0.00475733 | -0.3741189 | -0.1805204 | 0.16748471 | 0.03716563 | -0.2170518 | -0.1531285 |
| 0.09648458 | 0.14637511 | 0.34306493 | -0.3248837 | 0.00619604 | 0.49906041 | 0.21417477 |
| 1          | -0.0743645 | -0.0703176 | 0.07417594 | -0.01151   | -0.0051694 | 0.02861407 |
| -0.0743645 | 1          | 0.05334521 | -0.1607001 | 0.04218096 | 0.24074979 | 0.16137307 |
| -0.0703176 | 0.05334521 | 1          | -0.1893112 | -0.0241449 | 0.55677464 | 0.24816004 |
| 0.07417594 | -0.1607001 | -0.1893112 | 1          | 0.02161154 | -0.156497  | -0.0944249 |
| -0.01151   | 0.04218096 | -0.0241449 | 0.02161154 | 1          | -0.0074384 | 0.01409756 |
| -0.0051694 | 0.24074979 | 0.55677464 | -0.156497  | -0.0074384 | 1          | 0.40888692 |
| 0.02861407 | 0.16137307 | 0.24816004 | -0.0944249 | 0.01409756 | 0.40888692 | 1          |
| -0.0101624 | -0.0074153 | -0.009446  | 0.04521396 | 0.91854287 | -0.039483  | -0.009257  |
| -0.0174847 | 0.25472188 | 0.62083111 | -0.0931751 | 0.00679591 | 0.67916399 | 0.30566971 |
| 0.13994946 | 0.23723918 | 0.0686154  | -0.1391026 | 0.0203065  | 0.45665442 | 0.29944335 |

-0.0506718 -0.1309272 0.19575183 -0.2290803 0.08396363 -0.1034447 -0.0131308  
0.07315642 -0.2227749 0.02535744 -0.1134498 -0.0113882 -0.2121793 -0.0724466  
0.0786666 -0.0618705 0.11169314 0.02809448 0.010894 0.15758383 0.05830083  
0.00156575 -0.0266311 0.0080933 -0.0236022 -0.0050102 0.16392468 -0.0070672  
0.08101598 -0.0516346 -0.172647 0.09371376 0.08634594 -0.3094385 -0.1061862  
-0.0582699 0.20930141 -0.079911 -0.0705326 0.01767438 -0.2703147 -0.1774442  
0.00267633 -0.0273876 0.01063568 -0.0145109 -0.0058021 0.17111294 -0.0065805  
0.0428604 0.04547721 0.13912721 -0.1365328 0.38089695 0.0612358 0.14688613  
0.21926174 0.01234174 -0.0853612 0.01103302 0.51520769 -0.0035141 0.02706003  
-0.0409244 0.33432624 0.10268496 -0.0297296 0.04344654 0.41510832 0.24715498  
-0.0839862 0.06593547 0.66833961 -0.2055575 -0.0553715 0.66444005 0.24734933  
-0.0348827 0.16455146 0.64953932 -0.1321954 0.0068862 0.67637067 0.29577352  
0.0013536 0.01822489 0.05226834 0.03064386 0.05623086 0.02975507 0.06650067  
0.10048161 0.04722331 0.03559337 0.0324566 0.10690836 0.2377076 0.1264316  
0.00173303 -0.0273297 0.01066711 -0.0203106 -0.0060946 0.16924157 -0.005855  
0.00121924 0.20405815 0.36266306 -0.1631468 -0.0223296 0.6217799 0.26345905  
0.02045014 0.03500301 -0.0973774 -0.1025802 0.01227746 -0.2986622 -0.0703016  
8.10E-05 0.07467562 0.21380164 0.00923661 0.04181926 0.34523448 0.14989182  
-0.0185721 0.29761091 0.5505479 -0.2343954 -0.0023447 0.76458334 0.34691294  
0.01849474 -0.1621596 0.31752455 -0.3373696 -0.0524908 0.11264434 0.02950895  
0.04537911 0.02412608 0.49973133 -0.2094058 0.13257221 0.40554421 0.1916426  
-0.0151302 -0.1694496 -0.0431632 0.06961925 -0.013479 -0.1063294 -0.0810452  
-0.0586156 0.06658627 0.88719294 -0.1664092 -0.00873 0.51979635 0.2203186  
-0.0557412 0.20380141 0.06002319 -0.1818529 0.32587012 0.19175105 0.18134411  
-0.0649715 0.0391573 0.07216848 -0.19634 0.00555869 0.00844351 -0.0572345  
0.13194349 0.02052856 0.26461707 -0.1866841 -0.0181162 0.4367247 0.22214723  
-0.0299871 -0.0397415 0.22348275 -0.113996 0.38854469 0.01133931 0.06397187  
0.00473652 0.1531301 0.54355685 -0.2156747 -0.0227311 0.61099157 0.28798888

| PLIN1      | ACAA1      | ACSL3      | CD36       | CPT1B      | FABP3      | CYP7A1     |
|------------|------------|------------|------------|------------|------------|------------|
| 0.00186826 | -0.2718777 | -0.4752871 | 0.2119116  | 0.1020781  | 0.01852679 | -0.041902  |
| -0.0106968 | -0.0508101 | -0.059093  | -0.0047645 | -0.0203718 | -0.0510027 | -0.0028154 |
| -0.0351737 | 0.84870732 | 0.188907   | -0.1549219 | -0.1309509 | 0.16273771 | 0.1106209  |
| 0.00394715 | -0.0333389 | 0.25410135 | 0.29905613 | 0.17006525 | 0.06178096 | -0.0121746 |
| -0.0060732 | 0.80130924 | 0.18130362 | -0.152621  | -0.1275456 | 0.21334355 | 0.13918922 |
| 0.01790474 | -0.1369281 | -0.2227233 | 0.26480918 | -0.0084242 | 0.09786583 | -0.0361957 |
| -0.0062888 | 0.12349254 | -0.2165928 | 0.18720512 | 0.01511576 | 0.00950942 | 0.07923807 |
| 0.07591686 | -0.2215697 | 0.00171484 | 0.15167801 | -0.0472341 | -0.1545023 | -0.0250404 |
| 0.00188443 | -0.0430086 | -0.1370874 | -0.1159945 | 0.03156742 | 0.03403505 | -0.0399192 |
| -0.0105086 | 0.38542909 | -0.0166559 | -0.2289291 | -0.1265229 | 0.20470272 | 0.52478    |
| -0.0062211 | -0.281646  | -0.1724961 | 0.14342416 | 0.06521577 | -0.136454  | -0.0244848 |
| 0.04368936 | 0.01525333 | 0.20643933 | -0.0813281 | -0.0090893 | 0.06086393 | -0.0022638 |
| 0.05298595 | 0.62027032 | 0.15242244 | -0.1570208 | 0.06170643 | 0.04307571 | -0.0231245 |
| -0.0148037 | -0.0385671 | -0.0294592 | -0.0464736 | 0.11557261 | -0.019817  | 0.04914166 |
| -0.0132533 | -0.0368549 | -0.0203171 | -0.2553432 | -0.0870607 | 0.04394392 | 0.01484196 |
| 0.03409116 | -0.3559579 | -0.2937403 | 0.19853436 | 0.0716317  | -0.152008  | -0.0208844 |
| 0.05505884 | -0.195711  | -0.460582  | 0.07908083 | 0.15230791 | -0.0065    | -0.0135496 |
| 0.00326523 | -0.2016014 | 0.01576347 | -0.0356338 | -0.0220694 | -0.188854  | -0.0066858 |
| -0.0036607 | 0.23443048 | 0.05733786 | -0.2813209 | -0.101452  | 0.30904835 | 0.05087285 |
| -0.0268314 | 0.84790783 | 0.19831958 | -0.1808562 | -0.1224938 | 0.17952394 | 0.38030959 |
| -0.0236173 | 0.23785251 | 0.48840924 | -0.0489194 | -0.0623126 | 0.02858293 | -0.0517694 |
| -0.0307008 | 0.71621613 | 0.30531437 | -0.1241945 | -0.0164184 | 0.16442241 | -0.017968  |
| -0.0086328 | 0.07628961 | -0.0152936 | -0.0741556 | 0.01135652 | 0.14975863 | 0.98665144 |
| -0.0113334 | -0.1406928 | -0.3188759 | -0.1586668 | 0.00641277 | 0.19824273 | -0.0280614 |
| 0.13061422 | 0.05507075 | -0.1238212 | 0.13373229 | 0.38660604 | -0.1462335 | -0.0616496 |
| -0.0111625 | 0.04545569 | -0.0248921 | -0.0343513 | -0.0112193 | 0.12064331 | 0.99866232 |
| 0.69426505 | 0.06361939 | 0.04858085 | -0.0099858 | 0.04507786 | 0.28498566 | 0.01467102 |
| -0.0119421 | 0.05235568 | -0.0274009 | -0.0417483 | -0.0112691 | 0.13366538 | 0.97206277 |
| -0.0212231 | 0.54439581 | 0.4622176  | -0.1006801 | -0.0262564 | 0.16152127 | 0.03736971 |
| -0.0044885 | -0.1185497 | -0.175219  | 0.11686671 | 0.0138693  | -0.1489943 | -0.0221834 |
| -0.0296897 | 0.31558194 | 0.49580964 | -0.3148238 | 0.01390877 | 0.21277037 | 0.05830428 |
| -0.0373353 | 0.54202699 | 0.11315479 | 0.18890431 | -0.105458  | 0.05362021 | -0.0153518 |
| 0.10586269 | -0.3149412 | -0.1461098 | 0.10967385 | -0.0691895 | -0.0362563 | -0.0233061 |
| -0.0158219 | 0.26881051 | 0.52106842 | 0.07616843 | 0.08752712 | 0.13795201 | 0.01449346 |
| -0.0101624 | -0.0174847 | 0.13994946 | -0.0506718 | 0.07315642 | 0.0786666  | 0.00156575 |
| -0.0074153 | 0.25472188 | 0.23723918 | -0.1309272 | -0.2227749 | -0.0618705 | -0.0266311 |
| -0.009446  | 0.62083111 | 0.0686154  | 0.19575183 | 0.02535744 | 0.11169314 | 0.0080933  |
| 0.04521396 | -0.0931751 | -0.1391026 | -0.2290803 | -0.1134498 | 0.02809448 | -0.0236022 |
| 0.91854287 | 0.00679591 | 0.0203065  | 0.08396363 | -0.0113882 | 0.010894   | -0.0050102 |
| -0.039483  | 0.67916399 | 0.45665442 | -0.1034447 | -0.2121793 | 0.15758383 | 0.16392468 |
| -0.009257  | 0.30566971 | 0.29944335 | -0.0131308 | -0.0724466 | 0.05830083 | -0.0070672 |
| 1          | -0.0152373 | -0.0243057 | 0.11266523 | 0.053736   | -0.0033692 | -0.0104496 |
| -0.0152373 | 1          | 0.23224966 | -0.2145887 | -0.0882898 | 0.21190421 | 0.04462571 |
| -0.0243057 | 0.23224966 | 1          | -0.1044374 | -0.1531221 | -0.0411321 | -0.0260233 |

|            |            |            |            |            |            |            |            |
|------------|------------|------------|------------|------------|------------|------------|------------|
| 0.11266523 | -0.2145887 | -0.1044374 |            | 1          | 0.04481511 | -0.1300682 | -0.0327975 |
| 0.053736   | -0.0882898 | -0.1531221 | 0.04481511 |            | 1          | -0.0070182 | -0.0097594 |
| -0.0033692 | 0.21190421 | -0.0411321 | -0.1300682 | -0.0070182 |            | 1          | 0.12085369 |
| -0.0104496 | 0.04462571 | -0.0260233 | -0.0327975 | -0.0097594 | 0.12085369 |            | 1          |
| 0.11855487 | -0.2525605 | -0.1205636 | 0.14533459 | 0.05990245 | -0.2499276 | -0.0352932 |            |
| 0.04336512 | -0.1890061 | -0.2751512 | 0.2150209  | 0.06544418 | -0.1742496 | -0.0486881 |            |
| -0.0113175 | 0.05370985 | -0.0254675 | -0.0382682 | -0.013715  | 0.12048271 | 0.99747713 |            |
| 0.37678828 | 0.05125159 | 0.06678956 | 0.19606574 | 0.09883418 | 0.07703663 | 0.01614388 |            |
| 0.53451796 | -0.0356368 | 0.11219802 | 0.0354651  | 0.04554399 | -0.0470965 | 0.00118134 |            |
| -0.0178068 | 0.34254982 | 0.58609609 | -0.2173488 | -0.2621226 | -0.0405539 | -0.0207368 |            |
| -0.0313642 | 0.49929134 | 0.16269322 | 0.16907765 | -0.1806865 | 0.13341365 | -0.0079887 |            |
| -0.0175212 | 0.76720645 | 0.23275131 | -0.0078992 | -0.1201968 | 0.10545623 | 0.01181363 |            |
| 0.05410482 | 0.01866784 | -0.095219  | 0.06152954 | -0.0892677 | -0.0742803 | 0.05891754 |            |
| 0.0836212  | 0.27921219 | 0.35078232 | -0.2499051 | 0.12900217 | 0.23439483 | 0.13847034 |            |
| -0.0120443 | 0.0521992  | -0.0243473 | -0.0380459 | -0.0132674 | 0.12326744 | 0.9988656  |            |
| -0.0759369 | 0.42900532 | 0.50788166 | 0.04996833 | -0.3107728 | 0.20361193 | 0.20893658 |            |
| 0.02746414 | -0.1953563 | -0.2564451 | 0.0575878  | 0.24770968 | 0.14880481 | 0.03000982 |            |
| 0.02949899 | 0.26443219 | 0.13555021 | -0.0640397 | -0.0379032 | 0.07789183 | -0.0075441 |            |
| -0.0428996 | 0.72039867 | 0.47853778 | -0.0471519 | -0.2225281 | 0.17156442 | -0.0195862 |            |
| 0.01110942 | -0.0217333 | 0.03352496 | 0.33440362 | 0.30464849 | 0.03668691 | -0.0300267 |            |
| 0.13138964 | 0.46014167 | 0.14334965 | 0.07036832 | 0.21075167 | 0.22158179 | 0.00479075 |            |
| 0.00843577 | -0.1715268 | -0.1382123 | 0.06438313 | -0.0293731 | -0.0292567 | 0.24000663 |            |
| 0.00251974 | 0.66853704 | 0.07730379 | 0.18446304 | 0.03790264 | 0.11009904 | 0.023741   |            |
| 0.26877896 | 0.08572246 | 0.29765122 | 0.23425694 | -0.1159556 | 0.01115419 | -0.0317586 |            |
| 0.01111383 | -0.1205343 | -0.0383946 | 0.28826488 | -0.1158113 | -0.141113  | -0.0457966 |            |
| -0.039778  | 0.2856845  | 0.5031355  | -0.0132591 | 0.00801071 | 0.32144621 | 0.07864117 |            |
| 0.37583318 | -0.0322775 | -0.0366102 | 0.65524616 | 0.08272059 | 0.02104774 | -0.0099861 |            |
| -0.0462051 | 0.49414186 | 0.26882365 | 0.08189415 | -0.1906475 | 0.3052228  | -0.0241544 |            |

| CPT1C      | PPARD      | APOC3      | RXRG       | UCP1       | ACSL4      | EHHADH     |
|------------|------------|------------|------------|------------|------------|------------|
| 0.09974077 | 0.28767735 | -0.0442978 | -0.0917775 | -0.1031845 | -0.3947396 | -0.1050967 |
| 0.00929119 | 0.02419079 | -0.0042835 | -0.0362096 | -0.0177238 | -0.0049857 | -0.0628078 |
| -0.2164113 | -0.1911449 | 0.12118232 | 0.05522595 | -0.0468862 | 0.31699864 | 0.58221116 |
| -0.1390696 | -0.0511146 | -0.0172142 | 0.15462351 | 0.16595761 | -0.0777993 | 0.02081511 |
| -0.2265228 | -0.1775097 | 0.14740606 | 0.08710093 | -0.0259706 | 0.32040565 | 0.57596335 |
| -0.0898239 | -0.0092928 | -0.0390897 | 0.03305595 | -0.0908845 | -0.2752336 | 0.34747955 |
| -0.1153263 | -0.0007135 | 0.07874436 | 0.09943393 | -0.0806215 | -0.2253568 | 0.32055371 |
| 0.0730931  | 0.22521357 | -0.0263998 | 0.08094604 | 0.01395011 | -0.023419  | -0.0375902 |
| -0.1928381 | 0.03566595 | -0.0387512 | -0.1125661 | -0.0613283 | -0.010089  | 0.07718155 |
| -0.1700182 | -0.139966  | 0.5288043  | -0.0340611 | -0.0342974 | 0.18904254 | 0.25898407 |
| 0.40676393 | 0.16892974 | -0.0294788 | -0.1150479 | -0.0106936 | -0.1791798 | -0.2970308 |
| -0.0211661 | -0.0799467 | -0.0023431 | 0.02477657 | 0.1258256  | 0.25888894 | -0.0626125 |
| 0.04956101 | -0.1146425 | -0.0163926 | 0.13720689 | 0.12566021 | 0.17964953 | 0.38468908 |
| 0.07540538 | 0.00798342 | 0.04730657 | 0.05935533 | 0.040691   | -0.0186805 | -0.1102459 |
| -0.0164598 | -0.1115497 | 0.01816532 | -0.1816486 | -0.0025325 | -0.0097384 | -0.1688503 |
| 0.1005032  | 0.20908139 | -0.0265638 | -0.0866998 | -0.0820008 | -0.3687049 | -0.1628691 |
| 0.04209589 | 0.00547869 | -0.0102207 | -0.0145377 | -0.0687487 | -0.3981857 | -0.0564709 |
| -0.0052309 | 0.07727887 | -0.0073979 | -0.03142   | -0.0008109 | 0.06482465 | -0.0692491 |
| -0.1766026 | -0.220375  | 0.05880653 | -0.0699712 | 0.00510588 | 0.08840804 | 0.06196618 |
| -0.1994793 | -0.1766836 | 0.39057686 | 0.03884061 | -0.0365112 | 0.33811869 | 0.43047338 |
| -0.2859204 | -0.1873896 | -0.050888  | 0.01694897 | 0.02449391 | 0.27987944 | 0.44999543 |
| -0.3291387 | -0.2649914 | -0.0140707 | 0.07556948 | -0.0440747 | 0.31883356 | 0.63092969 |
| -0.0201331 | -0.0817524 | 0.98515037 | 0.03406673 | 0.02631759 | -0.0123032 | -0.0269802 |
| 0.0412429  | -0.0986329 | -0.0265443 | -0.168298  | -0.0780723 | -0.2382013 | -0.1535299 |
| 0.19289109 | 0.31176169 | -0.0699747 | 0.14994362 | 0.05231924 | -0.1059037 | -0.0097609 |
| -0.0343144 | -0.0488941 | 0.99904203 | 0.00313095 | 0.00256411 | -0.0202137 | -0.0069905 |
| 0.00986983 | -0.0492755 | 0.01839934 | 0.32030322 | 0.45629187 | -0.0021906 | -0.0042647 |
| -0.0347744 | -0.0552089 | 0.95876266 | 0.08275227 | 0.00394821 | -0.0204503 | 0.00035431 |
| -0.301303  | -0.2194195 | 0.04377385 | 0.08055902 | 0.04868627 | 0.26856185 | 0.55961581 |
| 0.02409561 | 0.01773388 | -0.0215565 | -0.0500522 | -0.0447642 | -0.1714888 | -0.081714  |
| -0.0506403 | -0.2378303 | 0.06231159 | 0.12986009 | 0.10726174 | 0.35118832 | -0.0437913 |
| -0.2211701 | -0.0867545 | -0.0116502 | 0.11634514 | -0.0938207 | 0.1503016  | 0.7268075  |
| 0.09748564 | -0.040793  | -0.0201346 | -0.0913875 | -0.0108739 | -0.2107724 | -0.0135828 |
| -0.231766  | -0.1687423 | 0.01129402 | 0.16477525 | 0.03992784 | 0.17120575 | 0.34454291 |
| 0.08101598 | -0.0582699 | 0.00267633 | 0.0428604  | 0.21926174 | -0.0409244 | -0.0839862 |
| -0.0516346 | 0.20930141 | -0.0273876 | 0.04547721 | 0.01234174 | 0.33432624 | 0.06593547 |
| -0.172647  | -0.079911  | 0.01063568 | 0.13912721 | -0.0853612 | 0.10268496 | 0.66833961 |
| 0.09371376 | -0.0705326 | -0.0145109 | -0.1365328 | 0.01103302 | -0.0297296 | -0.2055575 |
| 0.08634594 | 0.01767438 | -0.0058021 | 0.38089695 | 0.51520769 | 0.04344654 | -0.0553715 |
| -0.3094385 | -0.2703147 | 0.17111294 | 0.0612358  | -0.0035141 | 0.41510832 | 0.66444005 |
| -0.1061862 | -0.1774442 | -0.0065805 | 0.14688613 | 0.02706003 | 0.24715498 | 0.24734933 |
| 0.11855487 | 0.04336512 | -0.0113175 | 0.37678828 | 0.53451796 | -0.0178068 | -0.0313642 |
| -0.2525605 | -0.1890061 | 0.05370985 | 0.05125159 | -0.0356368 | 0.34254982 | 0.49929134 |
| -0.1205636 | -0.2751512 | -0.0254675 | 0.06678956 | 0.11219802 | 0.58609609 | 0.16269322 |

|            |            |            |            |            |            |            |
|------------|------------|------------|------------|------------|------------|------------|
| 0.14533459 | 0.2150209  | -0.0382682 | 0.19606574 | 0.0354651  | -0.2173488 | 0.16907765 |
| 0.05990245 | 0.06544418 | -0.013715  | 0.09883418 | 0.04554399 | -0.2621226 | -0.1806865 |
| -0.2499276 | -0.1742496 | 0.12048271 | 0.07703663 | -0.0470965 | -0.0405539 | 0.13341365 |
| -0.0352932 | -0.0486881 | 0.99747713 | 0.01614388 | 0.00118134 | -0.0207368 | -0.0079887 |
| 1          | 0.22985648 | -0.0386625 | 0.13663491 | 0.19475952 | -0.1953993 | -0.3165194 |
| 0.22985648 | 1          | -0.0523546 | 0.01407589 | -0.0038344 | -0.1976423 | -0.1216685 |
| -0.0386625 | -0.0523546 | 1          | 0.00202193 | 0.00032526 | -0.0184587 | -0.003025  |
| 0.13663491 | 0.01407589 | 0.00202193 | 1          | 0.38050027 | 0.0215213  | 0.03724861 |
| 0.19475952 | -0.0038344 | 0.00032526 | 0.38050027 | 1          | -0.019698  | -0.1069018 |
| -0.1953993 | -0.1976423 | -0.0184587 | 0.0215213  | -0.019698  | 1          | 0.13280301 |
| -0.3165194 | -0.1216685 | -0.003025  | 0.03724861 | -0.1069018 | 0.13280301 | 1          |
| -0.1959956 | -0.1399788 | 0.02051375 | 0.08164043 | -0.059727  | 0.31565139 | 0.5766677  |
| 0.20763551 | 0.05560695 | 0.06465755 | 0.07602151 | 0.02123318 | -0.1429075 | 0.12128952 |
| -0.1436344 | -0.1609987 | 0.14308202 | 0.09719062 | 0.14557578 | 0.150822   | -0.0374052 |
| -0.0381779 | -0.0520115 | 0.99853471 | 0.01021319 | 0.00034537 | -0.0171478 | -0.0048018 |
| -0.3575296 | -0.2639963 | 0.21011085 | 0.05533697 | -0.0438928 | 0.44046366 | 0.55915724 |
| 0.10958628 | 0.10476412 | 0.02459473 | 0.09590678 | 0.08725339 | -0.29853   | -0.1199627 |
| -0.1450595 | -0.1119885 | -0.0029512 | -0.0017917 | 0.09004534 | 0.21509598 | 0.19954918 |
| -0.3344317 | -0.2538107 | -0.0165818 | 0.07555277 | -0.0281616 | 0.41041466 | 0.67418523 |
| -0.1797436 | -0.0048485 | -0.0368379 | 0.15482666 | -0.0325967 | -0.2310794 | 0.40572435 |
| -0.1851555 | -0.1541421 | 0.00872835 | 0.15310072 | 0.12335475 | 0.02408734 | 0.39963487 |
| 0.26438596 | 0.02736082 | 0.23780926 | 0.02947657 | 0.00232306 | -0.1530882 | -0.0728913 |
| -0.1473814 | -0.0648637 | 0.02599065 | 0.13477273 | -0.0740577 | 0.12525377 | 0.55753561 |
| 0.04272229 | -0.0764386 | -0.036235  | 0.17338624 | 0.11766454 | 0.09886822 | 0.0491318  |
| 0.12527699 | 0.16674878 | -0.05478   | 0.11831735 | -0.0359966 | -0.0925794 | 0.20142265 |
| -0.3304056 | -0.3001591 | 0.07811836 | 0.06065779 | 0.0719102  | 0.14740446 | 0.32407936 |
| 0.0574506  | 0.07717672 | -0.0119976 | 0.31796569 | 0.15714991 | -0.0755434 | 0.07541781 |
| -0.3296255 | -0.1882206 | -0.022693  | 0.11578186 | -0.0516201 | 0.12498809 | 0.69091397 |



| PCK1       | RXRA       | PLIN5      | APOA1      | SCP2       | SLC27A1    | FABP2      |
|------------|------------|------------|------------|------------|------------|------------|
| -0.2289249 | 0.0481344  | -0.2749759 | -0.0432919 | -0.3018309 | 0.10686011 | -0.1556754 |
| -0.0396967 | -0.0599623 | -0.0076209 | -0.0044053 | -0.0488665 | -0.0367134 | -0.0011264 |
| 0.80945237 | 0.10815239 | 0.20663042 | 0.11914094 | 0.43021477 | -0.1651765 | 0.27384271 |
| -0.0271354 | -0.1579045 | 0.25983559 | -0.0145835 | 0.08420648 | 0.11676555 | 0.02953004 |
| 0.73631881 | 0.12622491 | 0.23052332 | 0.1465074  | 0.42137216 | -0.0786412 | 0.31829928 |
| -0.0627752 | 0.11398718 | -0.303839  | -0.0385659 | 0.04276251 | 0.01068696 | -0.0938445 |
| 0.16795848 | 0.02363279 | -0.1491374 | 0.07915658 | 0.0641418  | 0.06380785 | 0.00830455 |
| -0.1263646 | 0.08816373 | -0.1044161 | -0.0288915 | 0.00628156 | 0.01258192 | 0.02249648 |
| -0.0715954 | -0.2193242 | -0.1484185 | -0.037836  | -0.0009544 | -0.0519982 | 0.04405628 |
| 0.32216294 | 0.05053849 | 0.20221083 | 0.52801219 | 0.3008154  | -0.1057345 | 0.1786331  |
| -0.1956922 | 0.04358726 | -0.2207458 | -0.0267039 | -0.2679475 | -0.0287029 | -0.1360759 |
| -0.0150902 | -0.0385574 | 0.06190982 | -0.0001732 | 0.08750672 | 0.04387513 | 0.01598313 |
| 0.54950283 | 0.02573618 | 0.22309543 | -0.0176963 | 0.20599089 | -0.0986568 | 0.32722752 |
| -0.0347652 | -0.0497552 | 0.03108603 | 0.04815726 | -0.0839023 | -0.0408163 | 0.0211392  |
| -0.1187252 | -0.0054839 | 0.0440125  | 0.01521748 | -0.121471  | 0.00592243 | 0.07198949 |
| -0.289989  | 0.10511076 | -0.2957507 | -0.0254349 | -0.3117593 | 0.13682302 | -0.2082758 |
| -0.1549849 | 0.16280249 | -0.1970979 | -0.0127584 | -0.3027089 | 0.17146549 | -0.0933736 |
| -0.223615  | -0.0030156 | -0.1575179 | -0.0092887 | -0.0172292 | -0.1255928 | -0.0352101 |
| 0.07613421 | -0.1426042 | 0.17346879 | 0.05541793 | 0.16216764 | -0.0272912 | 0.08490576 |
| 0.71844973 | 0.08172533 | 0.2635378  | 0.39085103 | 0.43057947 | -0.1837687 | 0.2284763  |
| 0.24720524 | 0.09600098 | 0.19612437 | -0.0512056 | 0.44260964 | -0.0767298 | 0.16933558 |
| 0.68268352 | -0.0177631 | 0.2506811  | -0.0132095 | 0.48734995 | -0.2023821 | 0.27744199 |
| 0.0337022  | 0.05391468 | 0.19473265 | 0.98656091 | 0.19153227 | 0.06375105 | 0.00518459 |
| -0.1873026 | 0.00855645 | -0.0541346 | -0.0268318 | -0.208287  | -0.0322026 | -0.0287128 |
| 0.00846046 | 0.07920528 | 0.02384128 | -0.0679098 | -0.1791415 | 0.19347327 | -0.0680952 |
| 0.01395583 | 0.06129128 | 0.14028938 | 0.99910596 | 0.20594628 | 0.02972371 | -0.0077995 |
| 0.00748653 | 0.06481919 | 0.31735647 | 0.01544716 | 0.04594787 | 0.13657536 | 0.08047511 |
| 0.01366705 | 0.04674271 | 0.13521315 | 0.96765219 | 0.22162568 | 0.03956784 | 9.03E-07   |
| 0.53954883 | 0.04995552 | 0.3531784  | 0.03995982 | 0.46069829 | -0.1042891 | 0.306813   |
| -0.1261    | -0.015004  | -0.1461062 | -0.0233392 | -0.0905132 | -0.012883  | -0.0631199 |
| 0.21450197 | -0.0510975 | 0.52534674 | 0.062287   | 0.13171889 | 0.02219314 | 0.06910201 |
| 0.65133929 | 0.093516   | 0.00962408 | -0.0115663 | 0.45474735 | -0.083448  | 0.27763672 |
| -0.2174037 | 0.08902117 | -0.1892337 | -0.0216687 | -0.0919671 | -0.0214508 | -0.0908414 |
| 0.28962123 | -0.0345193 | 0.31145879 | 0.01275631 | 0.34027946 | -0.0180998 | 0.05860721 |
| -0.0348827 | 0.0013536  | 0.10048161 | 0.00173303 | 0.00121924 | 0.02045014 | 8.10E-05   |
| 0.16455146 | 0.01822489 | 0.04722331 | -0.0273297 | 0.20405815 | 0.03500301 | 0.07467562 |
| 0.64953932 | 0.05226834 | 0.03559337 | 0.01066711 | 0.36266306 | -0.0973774 | 0.21380164 |
| -0.1321954 | 0.03064386 | 0.0324566  | -0.0203106 | -0.1631468 | -0.1025802 | 0.00923661 |
| 0.0068862  | 0.05623086 | 0.10690836 | -0.0060946 | -0.0223296 | 0.01227746 | 0.04181926 |
| 0.67637067 | 0.02975507 | 0.2377076  | 0.16924157 | 0.6217799  | -0.2986622 | 0.34523448 |
| 0.29577352 | 0.06650067 | 0.1264316  | -0.005855  | 0.26345905 | -0.0703016 | 0.14989182 |
| -0.0175212 | 0.05410482 | 0.0836212  | -0.0120443 | -0.0759369 | 0.02746414 | 0.02949899 |
| 0.76720645 | 0.01866784 | 0.27921219 | 0.0521992  | 0.42900532 | -0.1953563 | 0.26443219 |
| 0.23275131 | -0.095219  | 0.35078232 | -0.0243473 | 0.50788166 | -0.2564451 | 0.13555021 |

-0.0078992 0.06152954 -0.2499051 -0.0380459 0.04996833 0.0575878 -0.0640397  
-0.1201968 -0.0892677 0.12900217 -0.0132674 -0.3107728 0.24770968 -0.0379032  
0.10545623 -0.0742803 0.23439483 0.12326744 0.20361193 0.14880481 0.07789183  
0.01181363 0.05891754 0.13847034 0.9988656 0.20893658 0.03000982 -0.0075441  
-0.1959956 0.20763551 -0.1436344 -0.0381779 -0.3575296 0.10958628 -0.1450595  
-0.1399788 0.05560695 -0.1609987 -0.0520115 -0.2639963 0.10476412 -0.1119885  
0.02051375 0.06465755 0.14308202 0.99853471 0.21011085 0.02459473 -0.0029512  
0.08164043 0.07602151 0.09719062 0.01021319 0.05533697 0.09590678 -0.0017917  
-0.059727 0.02123318 0.14557578 0.00034537 -0.0438928 0.08725339 0.09004534  
0.31565139 -0.1429075 0.150822 -0.0171478 0.44046366 -0.29853 0.21509598  
0.5766677 0.12128952 -0.0374052 -0.0048018 0.55915724 -0.1199627 0.19954918  
1 0.13496636 0.2246012 0.01850407 0.41048023 -0.1685802 0.2606992  
0.13496636 1 -0.1253905 0.05990919 -0.0638082 0.24124587 -0.0278019  
0.2246012 -0.1253905 1 0.14129581 0.11274814 0.00427748 0.10992002  
0.01850407 0.05990919 0.14129581 1 0.210486 0.02757503 -0.0040742  
0.41048023 -0.0638082 0.11274814 0.210486 1 -0.2852903 0.1983968  
-0.1685802 0.24124587 0.00427748 0.02757503 -0.2852903 1 -0.1235887  
0.2606992 -0.0278019 0.10992002 -0.0040742 0.1983968 -0.1235887 1  
0.63408932 -0.0229239 0.18543972 -0.0169291 0.71853422 -0.2729449 0.21287407  
0.06383294 -0.0800218 -0.0664082 -0.0354931 0.17365614 0.04436831 0.04218693  
0.41147279 0.0068587 0.30384797 0.00654754 0.2380886 0.02543528 0.15493177  
-0.1121062 0.12103886 -0.1316351 0.23922861 -0.0689779 0.0385375 -0.0992111  
0.62879877 0.03854584 0.06330937 0.02663953 0.32502765 -0.1001014 0.10736698  
0.12283036 0.07813103 0.1400269 -0.0333582 0.18494039 -0.1258991 0.04767003  
-0.0606208 0.1870369 -0.2811763 -0.0531084 0.04600714 0.10417231 -0.1447195  
0.24586534 -0.0674731 0.43225616 0.07793374 0.40190162 0.00407411 0.06145598  
0.10343975 0.01852742 -0.020685 -0.0113483 0.02912059 0.09048701 0.00624055  
0.42883524 0.0303269 0.10712412 -0.0229431 0.61161892 -0.126394 0.14604268

| ACADM      | ACADL      | AQP7       | FADS2      | CYP4A22    | LPL        | ILK        |
|------------|------------|------------|------------|------------|------------|------------|
| -0.3678096 | 0.11968302 | -0.1511559 | 0.22196418 | -0.0478059 | -0.1864044 | -0.0561946 |
| -0.0673837 | -0.0602532 | -0.0486845 | -0.0125808 | -0.0347657 | -0.0249779 | -0.0740632 |
| 0.69224946 | -0.0210207 | 0.424281   | -0.1046031 | 0.61074204 | 0.06533355 | -0.0916335 |
| 0.05023034 | 0.31090983 | 0.23069532 | -0.1588155 | 0.06959438 | 0.15301874 | 0.06781931 |
| 0.67474987 | -0.0155974 | 0.39712027 | -0.1068174 | 0.54206067 | 0.08174488 | -0.0512705 |
| -0.0046794 | 0.40947356 | 0.14655603 | 0.13959196 | 0.17625491 | -0.1144486 | 0.28144583 |
| 0.07719417 | 0.38572463 | 0.18351501 | 0.02165728 | 0.27441249 | -0.0347746 | 0.15852175 |
| -0.1050449 | 0.08326962 | -0.2091088 | 0.14628734 | -0.1610945 | -0.0528517 | 0.21064747 |
| -0.0218584 | 0.05433059 | -0.1224662 | -0.0014839 | -0.0513565 | -0.182184  | 0.02793373 |
| 0.26440035 | -0.114645  | 0.054687   | 0.15925977 | 0.22815961 | -0.1092552 | -0.1352696 |
| -0.3259923 | -0.1976467 | -0.2096215 | 0.13537348 | -0.1508233 | 0.00289436 | -0.0255811 |
| 0.00343876 | -0.0414237 | -0.0241348 | -0.0229897 | -0.0270785 | -0.0246191 | -0.0843932 |
| 0.50130565 | 0.05156682 | 0.32316909 | -0.0162169 | 0.41740453 | 0.04712412 | -0.227708  |
| -0.0572382 | 0.01079019 | -0.0208671 | -0.0201937 | -0.0298364 | -0.0467312 | -0.0825127 |
| -0.1078486 | -0.2954645 | -0.1640245 | 0.03214053 | -0.1639779 | -0.0567313 | -0.0712062 |
| -0.3819734 | 0.07764847 | -0.2153518 | 0.19305169 | -0.1457882 | -0.1601486 | 0.09350692 |
| -0.2623973 | 0.07704141 | -0.0924024 | 0.15353886 | -0.0712555 | -0.2024646 | 0.08590147 |
| -0.1351458 | -0.085304  | -0.2618909 | -0.0330084 | -0.1955073 | -0.1424814 | 0.08055969 |
| 0.14099462 | -0.1076926 | 0.18775573 | -0.0393698 | 0.02847672 | -0.0865682 | -0.1917837 |
| 0.63346184 | -0.1041191 | 0.3510399  | -0.0437291 | 0.5962217  | 0.04361083 | -0.158682  |
| 0.5177654  | 0.22153392 | 0.19992519 | -0.1306676 | 0.1226438  | 0.18942755 | 0.20479871 |
| 0.71778759 | 0.24702118 | 0.4784595  | -0.1534821 | 0.5532881  | 0.05477481 | -0.0698671 |
| -0.0089324 | -0.0476292 | 0.03536389 | 0.22746567 | 0.03209363 | -0.0330385 | -0.0844123 |
| -0.2374463 | -0.090013  | -0.1527615 | 0.09483721 | -0.1441352 | -0.2359198 | -0.2740769 |
| -0.0008894 | 0.19784703 | 0.20236609 | -0.1231777 | 0.07860151 | 0.12970406 | 0.34880556 |
| -0.0217507 | -0.0369347 | 0.00551434 | 0.24082728 | 0.0219847  | -0.0345059 | -0.050118  |
| 0.01599964 | -0.0347974 | 0.22703706 | -0.0085154 | 0.01458283 | 0.22227859 | -0.0546927 |
| -0.0018972 | -0.004639  | 0.00370952 | 0.23772405 | 0.04018466 | -0.0338204 | -0.0354243 |
| 0.67706036 | 0.22204614 | 0.44576262 | -0.1374748 | 0.37672357 | 0.28734322 | 0.05991324 |
| -0.1431859 | 0.03538034 | -0.1356263 | 0.11182476 | -0.0709048 | -0.0942233 | 0.0564761  |
| 0.22997587 | -0.1714476 | 0.26067661 | -0.0906871 | 0.08977055 | 0.16081232 | -0.2043861 |
| 0.61623085 | 0.32518065 | 0.41325381 | -0.1272499 | 0.54390131 | 0.07356572 | 0.18509192 |
| -0.2047406 | 0.02531975 | -0.2009649 | 0.27999836 | -0.177295  | -0.1195785 | 0.03796403 |
| 0.485364   | 0.35218742 | 0.38412159 | -0.1177437 | 0.31005542 | 0.26896304 | 0.17146797 |
| -0.0185721 | 0.01849474 | 0.04537911 | -0.0151302 | -0.0586156 | -0.0557412 | -0.0649715 |
| 0.29761091 | -0.1621596 | 0.02412608 | -0.1694496 | 0.06658627 | 0.20380141 | 0.0391573  |
| 0.5505479  | 0.31752455 | 0.49973133 | -0.0431632 | 0.88719294 | 0.06002319 | 0.07216848 |
| -0.2343954 | -0.3373696 | -0.2094058 | 0.06961925 | -0.1664092 | -0.1818529 | -0.19634   |
| -0.0023447 | -0.0524908 | 0.13257221 | -0.013479  | -0.00873   | 0.32587012 | 0.00555869 |
| 0.76458334 | 0.11264434 | 0.40554421 | -0.1063294 | 0.51979635 | 0.19175105 | 0.00844351 |
| 0.34691294 | 0.02950895 | 0.1916426  | -0.0810452 | 0.2203186  | 0.18134411 | -0.0572345 |
| -0.0428996 | 0.01110942 | 0.13138964 | 0.00843577 | 0.00251974 | 0.26877896 | 0.01111383 |
| 0.72039867 | -0.0217333 | 0.46014167 | -0.1715268 | 0.66853704 | 0.08572246 | -0.1205343 |
| 0.47853778 | 0.03352496 | 0.14334965 | -0.1382123 | 0.07730379 | 0.29765122 | -0.0383946 |

-0.0471519 0.33440362 0.07036832 0.06438313 0.18446304 0.23425694 0.28826488  
-0.2225281 0.30464849 0.21075167 -0.0293731 0.03790264 -0.1159556 -0.1158113  
0.17156442 0.03668691 0.22158179 -0.0292567 0.11009904 0.01115419 -0.141113  
-0.0195862 -0.0300267 0.00479075 0.24000663 0.023741 -0.0317586 -0.0457966  
-0.3344317 -0.1797436 -0.1851555 0.26438596 -0.1473814 0.04272229 0.12527699  
-0.2538107 -0.0048485 -0.1541421 0.02736082 -0.0648637 -0.0764386 0.16674878  
-0.0165818 -0.0368379 0.00872835 0.23780926 0.02599065 -0.036235 -0.05478  
0.07555277 0.15482666 0.15310072 0.02947657 0.13477273 0.17338624 0.11831735  
-0.0281616 -0.0325967 0.12335475 0.00232306 -0.0740577 0.11766454 -0.0359966  
0.41041466 -0.2310794 0.02408734 -0.1530882 0.12525377 0.09886822 -0.0925794  
0.67418523 0.40572435 0.39963487 -0.0728913 0.55753561 0.0491318 0.20142265  
0.63408932 0.06383294 0.41147279 -0.1121062 0.62879877 0.12283036 -0.0606208  
-0.0229239 -0.0800218 0.0068587 0.12103886 0.03854584 0.07813103 0.1870369  
0.18543972 -0.0664082 0.30384797 -0.1316351 0.06330937 0.1400269 -0.2811763  
-0.0169291 -0.0354931 0.00654754 0.23922861 0.02663953 -0.0333582 -0.0531084  
0.71853422 0.17365614 0.2380886 -0.0689779 0.32502765 0.18494039 0.04600714  
-0.2729449 0.04436831 0.02543528 0.0385375 -0.1001014 -0.1258991 0.10417231  
0.21287407 0.04218693 0.15493177 -0.0992111 0.10736698 0.04767003 -0.1447195  
1 0.17017384 0.39729278 -0.1668129 0.52976444 0.24657307 0.07047838  
0.17017384 1 0.28619177 0.01260482 0.24484025 -0.0015658 0.1865105  
0.39729278 0.28619177 1 -0.1538435 0.47386294 0.16081 -0.0312868  
-0.1668129 0.01260482 -0.1538435 1 -0.0478349 -0.080793 0.1274239  
0.52976444 0.24484025 0.47386294 -0.0478349 1 0.07750728 0.01564244  
0.24657307 -0.0015658 0.16081 -0.080793 0.07750728 1 0.06805735  
0.07047838 0.1865105 -0.0312868 0.1274239 0.01564244 0.06805735 1  
0.45740948 0.23539931 0.41838167 -0.103177 0.25868625 0.2630324 0.05287789  
0.001899 0.13393921 0.21544261 0.01734136 0.24326568 0.21244994 0.12706378  
0.70332715 0.29403611 0.42038042 -0.1104151 0.47911586 0.15785968 0.22793756

| ACSL1      | FABP4      | CPT2       |
|------------|------------|------------|
| -0.2373994 | 0.07373104 | -0.1925362 |
| -0.0255984 | -0.0185605 | -0.0765418 |
| 0.21819622 | -0.0184029 | 0.42385972 |
| 0.43924522 | 0.29179908 | 0.08487787 |
| 0.26003481 | -0.0112001 | 0.42207226 |
| 0.14871317 | 0.11361599 | 0.27728603 |
| 0.03404751 | 0.12540973 | 0.23967214 |
| -0.105966  | 0.00352668 | -0.1300301 |
| -0.1313542 | -0.0824305 | 0.01911847 |
| 0.04257302 | -0.0857437 | 0.13835231 |
| -0.2835496 | 0.04435819 | -0.3445525 |
| 0.04259748 | -0.0113781 | -0.0174047 |
| 0.07712442 | -0.0311434 | 0.23269867 |
| -0.0233753 | -0.0390233 | -0.1058525 |
| -0.0193893 | -0.1510303 | -0.0372042 |
| -0.2491293 | 0.06139075 | -0.2310545 |
| -0.2427029 | 0.07116214 | -0.1532974 |
| -0.1870279 | -0.0885006 | -0.0819969 |
| 0.18789187 | -0.0712047 | 0.15950951 |
| 0.20953387 | -0.0271895 | 0.33572287 |
| 0.45231593 | -0.0590075 | 0.48247585 |
| 0.35901683 | -0.0226987 | 0.4805087  |
| 0.08966851 | -0.0133703 | -0.0315809 |
| -0.2323014 | -0.109239  | -0.1810493 |
| 0.00047879 | 0.10773424 | 0.06889978 |
| 0.07818787 | -0.0104955 | -0.025591  |
| 0.16883438 | 0.28354831 | 0.11211748 |
| 0.09415509 | -0.0140474 | -0.0055582 |
| 0.57048128 | -0.0026014 | 0.56017079 |
| -0.1807074 | 0.06651062 | -0.1117458 |
| 0.41388019 | -0.0250409 | 0.20527716 |
| 0.22928551 | 0.14174933 | 0.56627954 |
| -0.0977896 | -0.0041664 | -0.1336247 |
| 0.65885275 | 0.10024328 | 0.52924282 |
| 0.13194349 | -0.0299871 | 0.00473652 |
| 0.02052856 | -0.0397415 | 0.1531301  |
| 0.26461707 | 0.22348275 | 0.54355685 |
| -0.1866841 | -0.113996  | -0.2156747 |
| -0.0181162 | 0.38854469 | -0.0227311 |
| 0.4367247  | 0.01133931 | 0.61099157 |
| 0.22214723 | 0.06397187 | 0.28798888 |
| -0.039778  | 0.37583318 | -0.0462051 |
| 0.2856845  | -0.0322775 | 0.49414186 |
| 0.5031355  | -0.0366102 | 0.26882365 |

|            |            |            |
|------------|------------|------------|
| -0.0132591 | 0.65524616 | 0.08189415 |
| 0.00801071 | 0.08272059 | -0.1906475 |
| 0.32144621 | 0.02104774 | 0.3052228  |
| 0.07864117 | -0.0099861 | -0.0241544 |
| -0.3304056 | 0.0574506  | -0.3296255 |
| -0.3001591 | 0.07717672 | -0.1882206 |
| 0.07811836 | -0.0119976 | -0.022693  |
| 0.06065779 | 0.31796569 | 0.11578186 |
| 0.0719102  | 0.15714991 | -0.0516201 |
| 0.14740446 | -0.0755434 | 0.12498809 |
| 0.32407936 | 0.07541781 | 0.69091397 |
| 0.24586534 | 0.10343975 | 0.42883524 |
| -0.0674731 | 0.01852742 | 0.0303269  |
| 0.43225616 | -0.020685  | 0.10712412 |
| 0.07793374 | -0.0113483 | -0.0229431 |
| 0.40190162 | 0.02912059 | 0.61161892 |
| 0.00407411 | 0.09048701 | -0.126394  |
| 0.06145598 | 0.00624055 | 0.14604268 |
| 0.45740948 | 0.001899   | 0.70332715 |
| 0.23539931 | 0.13393921 | 0.29403611 |
| 0.41838167 | 0.21544261 | 0.42038042 |
| -0.103177  | 0.01734136 | -0.1104151 |
| 0.25868625 | 0.24326568 | 0.47911586 |
| 0.2630324  | 0.21244994 | 0.15785968 |
| 0.05287789 | 0.12706378 | 0.22793756 |
| 1          | 0.07095361 | 0.50299069 |
| 0.07095361 | 1          | 0.11610326 |
| 0.50299069 | 0.11610326 | 1          |

Table S2: P-value for co-expression analysis

|         | ANGPTL4    | MMP1       | PCK2       | PPARG      | ACOX2      | PLIN2      |
|---------|------------|------------|------------|------------|------------|------------|
| ANGPTL4 | 0          | 0.64905899 | 1.54E-10   | 0.04503304 | 1.22E-10   | 3.92E-23   |
| MMP1    | 0.64905899 | 0          | 0.47681538 | 0.43536718 | 0.3810457  | 0.86061004 |
| PCK2    | 1.54E-10   | 0.47681538 | 0          | 0.04775047 | 1.19E-225  | 0.0128567  |
| PPARG   | 0.04503304 | 0.43536718 | 0.04775047 | 0          | 0.12011248 | 0.46651978 |
| ACOX2   | 1.22E-10   | 0.3810457  | 1.19E-225  | 0.12011248 | 0          | 0.01985852 |
| PLIN2   | 3.92E-23   | 0.86061004 | 0.0128567  | 0.46651978 | 0.01985852 | 0          |
| CYP27A1 | 0.00308358 | 0.75160419 | 7.89E-07   | 0.04593822 | 0.00137871 | 1.49E-10   |
| SORBS1  | 0.00351969 | 0.50916463 | 5.43E-06   | 0.87749499 | 0.00010703 | 0.26537062 |
| OLR1    | 0.51529232 | 0.40648842 | 0.16987229 | 0.00023515 | 0.05848525 | 0.0012932  |
| CYP8B1  | 0.10566515 | 0.40663581 | 2.22E-32   | 1.46E-05   | 7.25E-36   | 0.05749212 |
| FABP5   | 4.17E-08   | 0.03957208 | 1.25E-08   | 0.01683138 | 1.55E-11   | 0.98674024 |
| SLC27A6 | 0.00246573 | 0.03783888 | 0.92683595 | 0.00503572 | 0.94262678 | 0.0049828  |
| ACSBG2  | 8.51E-07   | 0.39777025 | 1.28E-83   | 0.06279814 | 2.49E-73   | 0.00023291 |
| GK2     | 0.61335319 | 0.98100807 | 0.4148775  | 0.29781785 | 0.31577399 | 0.45606247 |
| ACOX3   | 0.69781853 | 0.01134635 | 0.02987013 | 1.96E-06   | 0.06935534 | 0.04832232 |
| UBC     | 1.81E-35   | 0.47743888 | 2.98E-17   | 0.02008929 | 8.06E-17   | 9.75E-13   |
| NR1H3   | 1.06E-10   | 0.69059858 | 0.00151419 | 0.00044707 | 1.39E-06   | 3.40E-12   |
| ACSL5   | 0.55951151 | 0.23993307 | 4.05E-10   | 0.07676156 | 3.23E-10   | 0.03784389 |
| DBI     | 0.00633266 | 0.65717242 | 2.30E-06   | 0.89576425 | 2.90E-08   | 0.17041    |
| FABP1   | 9.58E-11   | 0.51825411 | 1.23E-175  | 0.01573545 | 2.00E-143  | 5.38E-05   |
| PDPK1   | 2.15E-24   | 0.01713954 | 1.43E-09   | 0.02905854 | 1.04E-13   | 0.75176461 |
| GK      | 3.79E-13   | 0.25093951 | 1.83E-119  | 0.0863389  | 3.41E-103  | 0.08593074 |
| SLC27A5 | 0.16574353 | 0.76578108 | 0.00064892 | 0.72234493 | 6.17E-05   | 0.06199099 |
| FABP6   | 1.51E-18   | 0.72184914 | 5.27E-05   | 1.31E-09   | 0.00019011 | 0.00333938 |
| RXRβ    | 0.27292377 | 0.37054848 | 0.62058399 | 0.43681705 | 0.3745988  | 0.69044882 |
| APOA5   | 0.29018439 | 0.92242347 | 0.00507798 | 0.73766944 | 0.00048097 | 0.31389643 |
| PLIN4   | 0.03719091 | 0.9101429  | 0.408924   | 0.00011861 | 0.02649444 | 0.44343226 |
| APOA2   | 0.29295344 | 0.89766389 | 0.00571443 | 0.9852173  | 0.00042018 | 0.8259628  |
| PPARA   | 7.84E-24   | 0.03574915 | 1.15E-54   | 2.57E-05   | 5.71E-60   | 0.49529093 |
| FABP7   | 1.42E-05   | 0.79303057 | 0.00087478 | 0.2094033  | 0.00389594 | 0.23300294 |
| SLC27A4 | 7.94E-22   | 0.52189909 | 7.80E-11   | 3.70E-06   | 1.66E-09   | 5.77E-16   |
| SLC27A2 | 0.00278807 | 0.13837173 | 1.97E-77   | 0.06184762 | 1.44E-68   | 5.62E-05   |
| SCD     | 3.90E-08   | 0.82214824 | 4.23E-08   | 0.00013711 | 3.98E-10   | 9.15E-13   |
| CPT1A   | 3.59E-09   | 0.03969138 | 1.47E-08   | 1.69E-16   | 3.38E-10   | 0.07786298 |
| ACSBG1  | 0.09852432 | 0.79693304 | 0.5506091  | 0.02928073 | 0.29943884 | 0.03298499 |
| SCD5    | 1.57E-11   | 0.4383811  | 7.08E-06   | 0.06987882 | 3.68E-08   | 5.43E-12   |
| CYP4A11 | 0.20503948 | 0.33613511 | 2.02E-72   | 0.0809427  | 1.38E-63   | 1.10E-08   |
| PLTP    | 0.0184899  | 0.58004514 | 0.01439876 | 9.79E-11   | 0.0365797  | 0.00125672 |
| ADIPOQ  | 0.1441429  | 0.85915422 | 0.66911043 | 0.70559241 | 0.88929031 | 0.33430611 |
| ACOX1   | 2.51E-20   | 0.05962389 | 1.26E-106  | 0.14123349 | 1.71E-92   | 0.70496913 |
| ACSL6   | 4.73E-09   | 0.37560988 | 4.64E-15   | 0.42891356 | 6.09E-15   | 0.0019962  |
| PLIN1   | 0.96324183 | 0.79187671 | 0.38543461 | 0.92243422 | 0.88091059 | 0.65870207 |
| ACAA1   | 8.15E-12   | 0.20977506 | 1.25E-170  | 0.4107213  | 5.33E-138  | 0.00068952 |
| ACSL3   | 9.31E-36   | 0.1445733  | 2.57E-06   | 1.85E-10   | 6.49E-06   | 2.63E-08   |
| CD36    | 1.24E-07   | 0.90643986 | 0.00012064 | 4.34E-14   | 0.00015246 | 2.90E-11   |
| CPT1B   | 0.0115817  | 0.61526016 | 0.00117761 | 2.38E-05   | 0.00158213 | 0.83537703 |

|         |            |            |            |            |            |            |
|---------|------------|------------|------------|------------|------------|------------|
| FABP3   | 0.64763203 | 0.20805087 | 5.31E-05   | 0.12714498 | 1.01E-07   | 0.01552282 |
| CYP7A1  | 0.30109684 | 0.9446308  | 0.00619686 | 0.76392435 | 0.00055996 | 0.37177073 |
| CPT1C   | 0.01364262 | 0.81871484 | 6.57E-08   | 0.00056621 | 1.50E-08   | 0.02640205 |
| PPARD   | 4.16E-13   | 0.55062707 | 1.94E-06   | 0.20705303 | 1.02E-05   | 0.81868422 |
| APOC3   | 0.27427761 | 0.91584845 | 0.00269656 | 0.67107799 | 0.00025601 | 0.33473181 |
| RXRG    | 0.02328419 | 0.3715872  | 0.17277439 | 0.00012438 | 0.03134379 | 0.41470581 |
| UCP1    | 0.01070604 | 0.6619359  | 0.24718379 | 3.75E-05   | 0.52168869 | 0.02466742 |
| ACSL4   | 3.23E-24   | 0.90211834 | 9.94E-16   | 0.05459916 | 4.71E-16   | 4.40E-12   |
| EHHADH  | 0.00933033 | 0.12093489 | 1.00E-56   | 0.60758864 | 2.78E-55   | 8.85E-19   |
| PCK1    | 1.05E-08   | 0.32727523 | 6.10E-143  | 0.50318088 | 2.13E-105  | 0.1211286  |
| RXRA    | 0.23481043 | 0.13874796 | 0.00745659 | 8.86E-05   | 0.00177079 | 0.00478724 |
| PLIN5   | 4.62E-12   | 0.85088092 | 2.57E-07   | 6.94E-11   | 8.20E-09   | 1.63E-14   |
| APOA1   | 0.28533277 | 0.91346471 | 0.00318334 | 0.71902565 | 0.00027945 | 0.34125433 |
| SCP2    | 2.46E-14   | 0.22775966 | 6.40E-29   | 0.03744441 | 1.08E-27   | 0.29126998 |
| SLC27A1 | 0.00820352 | 0.36496548 | 4.08E-05   | 0.00384946 | 0.05202637 | 0.79206413 |
| FABP2   | 0.00011166 | 0.97783367 | 5.69E-12   | 0.46624645 | 7.48E-16   | 0.02033764 |
| ACADM   | 5.22E-21   | 0.09609275 | 2.47E-88   | 0.21502922 | 2.20E-82   | 0.90810379 |
| ACADL   | 0.00304683 | 0.13683898 | 0.60404603 | 3.68E-15   | 0.70040279 | 4.21E-26   |
| AQP7    | 0.00017666 | 0.22949797 | 4.29E-28   | 7.99E-09   | 1.62E-24   | 0.00027813 |
| FADS2   | 2.94E-08   | 0.75629238 | 0.00966949 | 8.06E-05   | 0.00822932 | 0.00053941 |
| CYP4A22 | 0.23802345 | 0.39097326 | 9.75E-64   | 0.08564634 | 5.84E-48   | 1.18E-05   |
| LPL     | 3.50E-06   | 0.53773249 | 0.10666657 | 0.00014645 | 0.04339921 | 0.00461845 |
| ILK     | 0.16535241 | 0.06732621 | 0.02350262 | 0.09395746 | 0.20566982 | 1.38E-12   |
| ACSL1   | 2.83E-09   | 0.52767467 | 5.09E-08   | 3.29E-30   | 6.71E-11   | 0.00022517 |
| FABP4   | 0.06856707 | 0.64703443 | 0.64983119 | 1.86E-13   | 0.78232414 | 0.00492704 |
| CPT2    | 1.63E-06   | 0.05863876 | 4.91E-28   | 0.03594612 | 8.63E-28   | 3.01E-12   |



| CYP27A1    | SORBS1     | OLR1       | CYP8B1     | FABP5      | SLC27A6    | ACSBG2     |
|------------|------------|------------|------------|------------|------------|------------|
| 0.00308358 | 0.00351969 | 0.51529232 | 0.10566515 | 4.17E-08   | 0.00246573 | 8.51E-07   |
| 0.75160419 | 0.50916463 | 0.40648842 | 0.40663581 | 0.03957208 | 0.03783888 | 0.39777025 |
| 7.89E-07   | 5.43E-06   | 0.16987229 | 2.22E-32   | 1.25E-08   | 0.92683595 | 1.28E-83   |
| 0.04593822 | 0.87749499 | 0.00023515 | 1.46E-05   | 0.01683138 | 0.00503572 | 0.06279814 |
| 0.00137871 | 0.00010703 | 0.05848525 | 7.25E-36   | 1.55E-11   | 0.94262678 | 2.49E-73   |
| 1.49E-10   | 0.26537062 | 0.0012932  | 0.05749212 | 0.98674024 | 0.0049828  | 0.00023291 |
| 0          | 0.07034207 | 0.0335301  | 0.92681604 | 0.4309064  | 0.08762837 | 0.02340987 |
| 0.07034207 | 0          | 0.48524475 | 0.56952822 | 0.68649474 | 0.30217889 | 0.00795519 |
| 0.0335301  | 0.48524475 | 0          | 0.32377037 | 0.71935845 | 0.40395575 | 0.56448292 |
| 0.92681604 | 0.56952822 | 0.32377037 | 0          | 2.28E-05   | 0.63800325 | 1.26E-14   |
| 0.4309064  | 0.68649474 | 0.71935845 | 2.28E-05   | 0          | 0.77981161 | 3.77E-08   |
| 0.08762837 | 0.30217889 | 0.40395575 | 0.63800325 | 0.77981161 | 0          | 0.59392787 |
| 0.02340987 | 0.00795519 | 0.56448292 | 1.26E-14   | 3.77E-08   | 0.59392787 | 0          |
| 0.14845193 | 0.77182362 | 0.36245807 | 0.99541335 | 0.99102789 | 0.61087379 | 3.04E-05   |
| 4.62E-06   | 0.1955846  | 0.03161006 | 0.00520835 | 0.12967029 | 0.26665696 | 0.18852144 |
| 0.320512   | 0.00211363 | 0.02201311 | 0.0017089  | 6.83E-05   | 0.02719157 | 3.68E-08   |
| 1.45E-14   | 0.06933396 | 0.00017035 | 0.74584616 | 4.97E-05   | 0.00697901 | 0.04239292 |
| 3.03E-09   | 0.00053908 | 5.62E-07   | 0.12339394 | 0.92148502 | 0.23325727 | 7.75E-06   |
| 0.00119786 | 1.80E-10   | 0.21851025 | 0.00020643 | 0.70793165 | 0.07153212 | 0.13537399 |
| 0.01361151 | 2.82E-05   | 0.34736098 | 5.68E-50   | 3.34E-07   | 0.63208639 | 4.77E-57   |
| 0.14780841 | 0.00068551 | 0.97998735 | 0.00127728 | 7.30E-20   | 0.8048511  | 1.86E-05   |
| 5.79E-09   | 0.00016224 | 0.01666489 | 3.87E-14   | 3.39E-11   | 0.86294179 | 9.79E-58   |
| 0.10956547 | 0.12438083 | 0.07293372 | 2.97E-45   | 0.26587794 | 0.9719131  | 0.4401791  |
| 0.04290807 | 0.17991994 | 0.18460511 | 4.77E-05   | 0.01343051 | 0.14686515 | 0.12175368 |
| 0.15197428 | 0.34057715 | 0.00282302 | 1.95E-05   | 0.24468837 | 0.02811188 | 0.30487081 |
| 0.05666574 | 0.52435622 | 0.35157688 | 2.45E-44   | 0.5012414  | 0.9564093  | 0.61187806 |
| 0.72972059 | 0.82984906 | 0.36893219 | 0.13611831 | 0.12526172 | 0.00424978 | 0.19475822 |
| 0.01693931 | 0.35557098 | 0.27111597 | 9.16E-44   | 0.69598355 | 0.99089219 | 0.78893212 |
| 0.20154074 | 0.79429802 | 0.24987844 | 5.83E-11   | 1.51E-24   | 0.54361959 | 1.40E-34   |
| 0.16540316 | 0.01560819 | 0.81636889 | 0.25497581 | 0.01807171 | 0.29951793 | 0.08224746 |
| 0.0136185  | 1.26E-13   | 5.43E-09   | 0.03156658 | 0.02553318 | 0.00011202 | 8.61E-06   |
| 4.40E-32   | 0.02854636 | 0.40331309 | 2.94E-10   | 1.82E-10   | 0.10255952 | 9.77E-26   |
| 0.29758334 | 3.18E-13   | 0.03658685 | 0.21851384 | 0.00010635 | 0.09620034 | 0.00154059 |
| 0.35596111 | 0.45116392 | 0.00036501 | 0.71874562 | 4.31E-15   | 0.59797255 | 0.00040851 |
| 0.44158368 | 0.77528489 | 0.14556799 | 0.49202933 | 0.10298309 | 0.42381563 | 0.23353672 |
| 0.00334511 | 0.08239538 | 0.37993276 | 0.12025218 | 3.75E-09   | 0.9520753  | 0.00042356 |
| 6.34E-18   | 0.00017492 | 0.2719042  | 9.74E-10   | 3.63E-06   | 0.27471226 | 8.69E-33   |
| 0.00034293 | 0.61142263 | 0.05381587 | 2.32E-07   | 2.03E-06   | 0.34648426 | 0.52838982 |
| 0.55762581 | 0.09959344 | 0.67317853 | 0.98307598 | 0.75828291 | 0.19996095 | 0.71948081 |
| 0.00028908 | 0.02513588 | 0.56788356 | 4.36E-25   | 7.28E-17   | 0.76023058 | 5.90E-43   |
| 0.6642421  | 0.00082724 | 0.01532539 | 0.01888055 | 2.60E-06   | 0.07715772 | 2.42E-13   |
| 0.87671737 | 0.06073649 | 0.96292377 | 0.79545648 | 0.87803408 | 0.28092883 | 0.19088502 |
| 0.00222818 | 3.12E-08   | 0.28849995 | 4.49E-23   | 1.33E-12   | 0.70670285 | 3.06E-66   |
| 6.40E-08   | 0.96625845 | 0.00067956 | 0.68115067 | 1.81E-05   | 2.63E-07   | 0.00015554 |
| 3.17E-06   | 0.00016765 | 0.00409143 | 1.04E-08   | 0.00037603 | 0.04448266 | 9.72E-05   |
| 0.70922752 | 0.24369032 | 0.43604291 | 0.00172651 | 0.10730094 | 0.8225882  | 0.1276052  |

|            |            |            |            |            |            |            |
|------------|------------|------------|------------|------------|------------|------------|
| 0.81453339 | 0.00012593 | 0.40101317 | 3.33E-07   | 0.00072    | 0.13289775 | 0.28774737 |
| 0.05026432 | 0.53671471 | 0.32456885 | 1.54E-44   | 0.54579267 | 0.95546718 | 0.56833483 |
| 0.00431217 | 0.07100254 | 1.57E-06   | 2.39E-05   | 9.50E-26   | 0.60154559 | 0.22121159 |
| 0.98595827 | 1.82E-08   | 0.37881575 | 0.00052095 | 2.70E-05   | 0.04823732 | 0.00454914 |
| 0.05171825 | 0.51482878 | 0.33893797 | 2.57E-45   | 0.46702054 | 0.9539087  | 0.68592166 |
| 0.01393586 | 0.04549558 | 0.00534261 | 0.40065247 | 0.00440726 | 0.54101608 | 0.00067217 |
| 0.04637136 | 0.73074464 | 0.12995979 | 0.3973914  | 0.79193737 | 0.00183177 | 0.00185759 |
| 1.78E-08   | 0.5634169  | 0.80345286 | 2.53E-06   | 8.35E-06   | 8.18E-11   | 7.90E-06   |
| 4.56E-16   | 0.35361761 | 0.05655378 | 8.04E-11   | 6.53E-14   | 0.12209739 | 5.51E-23   |
| 3.01E-05   | 0.0017499  | 0.07699909 | 3.19E-16   | 1.09E-06   | 0.70969741 | 1.70E-49   |
| 0.55985938 | 0.02932799 | 4.32E-08   | 0.21222507 | 0.28205571 | 0.34136071 | 0.52545452 |
| 0.00021594 | 0.0098008  | 0.00023181 | 4.65E-07   | 3.52E-08   | 0.12635234 | 2.49E-08   |
| 0.05050194 | 0.47594514 | 0.3504761  | 3.66E-45   | 0.50999608 | 0.99659037 | 0.66242913 |
| 0.1132237  | 0.8768577  | 0.9812173  | 3.03E-14   | 1.66E-11   | 0.03056056 | 2.80E-07   |
| 0.11511688 | 0.75627168 | 0.19930004 | 0.00890778 | 0.47883219 | 0.27888648 | 0.01470355 |
| 0.83768264 | 0.57888869 | 0.27690455 | 8.90E-06   | 0.00074518 | 0.69336408 | 1.03E-16   |
| 0.05651329 | 0.00936543 | 0.58970543 | 3.12E-11   | 1.36E-16   | 0.93239896 | 3.41E-40   |
| 4.13E-23   | 0.03962348 | 0.17985333 | 0.00454825 | 8.47E-07   | 0.30665334 | 0.20305819 |
| 4.98E-06   | 1.83E-07   | 0.00242623 | 0.17701016 | 1.70E-07   | 0.55154937 | 2.55E-16   |
| 0.59313395 | 0.00028549 | 0.9707995  | 7.69E-05   | 0.00079416 | 0.57059196 | 0.68911111 |
| 5.12E-12   | 6.33E-05   | 0.2049095  | 1.17E-08   | 0.00018263 | 0.50407728 | 3.71E-27   |
| 0.39085254 | 0.19201276 | 5.84E-06   | 0.00686795 | 0.94308132 | 0.54359215 | 0.2447912  |
| 8.31E-05   | 1.48E-07   | 0.49069869 | 0.00080166 | 0.52795301 | 0.03702257 | 1.26E-08   |
| 0.40084071 | 0.00875871 | 0.0011366  | 0.29341525 | 9.22E-13   | 0.2931377  | 0.05673742 |
| 0.00189732 | 0.93067484 | 0.04166542 | 0.03408952 | 0.27362281 | 0.7789546  | 0.44223424 |
| 1.98E-09   | 0.00127636 | 0.637174   | 0.00060502 | 1.80E-18   | 0.66765586 | 5.88E-09   |

| GK2        | ACOX3      | UBC        | NR1H3      | ACSL5      | DBI        | FABP1      |
|------------|------------|------------|------------|------------|------------|------------|
| 0.61335319 | 0.69781853 | 1.81E-35   | 1.06E-10   | 0.55951151 | 0.00633266 | 9.58E-11   |
| 0.98100807 | 0.01134635 | 0.47743888 | 0.69059858 | 0.23993307 | 0.65717242 | 0.51825411 |
| 0.4148775  | 0.02987013 | 2.98E-17   | 0.00151419 | 4.05E-10   | 2.30E-06   | 1.23E-175  |
| 0.29781785 | 1.96E-06   | 0.02008929 | 0.00044707 | 0.07676156 | 0.89576425 | 0.01573545 |
| 0.31577399 | 0.06935534 | 8.06E-17   | 1.39E-06   | 3.23E-10   | 2.90E-08   | 2.00E-143  |
| 0.45606247 | 0.04832232 | 9.75E-13   | 3.40E-12   | 0.03784389 | 0.17041    | 5.38E-05   |
| 0.14845193 | 4.62E-06   | 0.320512   | 1.45E-14   | 3.03E-09   | 0.00119786 | 0.01361151 |
| 0.77182362 | 0.1955846  | 0.00211363 | 0.06933396 | 0.00053908 | 1.80E-10   | 2.82E-05   |
| 0.36245807 | 0.03161006 | 0.02201311 | 0.00017035 | 5.62E-07   | 0.21851025 | 0.34736098 |
| 0.99541335 | 0.00520835 | 0.0017089  | 0.74584616 | 0.12339394 | 0.00020643 | 5.68E-50   |
| 0.99102789 | 0.12967029 | 6.83E-05   | 4.97E-05   | 0.92148502 | 0.70793165 | 3.34E-07   |
| 0.61087379 | 0.26665696 | 0.02719157 | 0.00697901 | 0.23325727 | 0.07153212 | 0.63208639 |
| 3.04E-05   | 0.18852144 | 3.68E-08   | 0.04239292 | 7.75E-06   | 0.13537399 | 4.77E-57   |
| 0          | 0.99611147 | 0.53643388 | 0.91461044 | 0.24663639 | 0.72611275 | 0.81162009 |
| 0.99611147 | 0          | 0.95173872 | 0.15428788 | 2.84E-07   | 0.03492777 | 0.32637814 |
| 0.53643388 | 0.95173872 | 0          | 1.87E-11   | 0.01919099 | 0.00030988 | 2.48E-16   |
| 0.91461044 | 0.15428788 | 1.87E-11   | 0          | 0.0156671  | 0.20524073 | 8.78E-05   |
| 0.24663639 | 2.84E-07   | 0.01919099 | 0.0156671  | 0          | 0.00012554 | 5.18E-06   |
| 0.72611275 | 0.03492777 | 0.00030988 | 0.20524073 | 0.00012554 | 0          | 3.26E-06   |
| 0.81162009 | 0.32637814 | 2.48E-16   | 8.78E-05   | 5.18E-06   | 3.26E-06   | 0          |
| 0.05166273 | 0.40381759 | 9.42E-14   | 2.02E-10   | 0.11819181 | 0.03373134 | 7.62E-05   |
| 0.77721057 | 0.00188018 | 3.11E-17   | 0.00028487 | 2.18E-06   | 8.27E-10   | 4.39E-79   |
| 0.12486976 | 0.54305055 | 0.21988135 | 0.89420943 | 0.28005991 | 0.06039053 | 2.87E-25   |
| 0.30275072 | 3.33E-06   | 2.00E-07   | 3.73E-16   | 0.03942229 | 2.87E-06   | 0.00117836 |
| 0.875638   | 0.0080959  | 0.76652293 | 0.36725486 | 0.17102519 | 3.32E-05   | 0.18044669 |
| 0.23019505 | 0.67824586 | 0.57399473 | 0.76029577 | 0.84177527 | 0.18907226 | 8.24E-23   |
| 0.91359775 | 0.87672464 | 0.00333686 | 0.3303063  | 0.13176697 | 1.61E-15   | 0.37355717 |
| 0.24316165 | 0.93711036 | 0.57950889 | 0.72606997 | 0.85484838 | 0.09503848 | 1.24E-21   |
| 0.16007246 | 0.83270373 | 1.32E-27   | 6.33E-10   | 0.0003352  | 0.13479889 | 2.51E-37   |
| 0.58178635 | 0.89785645 | 0.00413848 | 0.00047039 | 0.68996068 | 0.81405531 | 0.00563633 |
| 0.78157251 | 0.0409124  | 5.79E-20   | 6.69E-18   | 4.40E-09   | 1.53E-14   | 1.05E-10   |
| 0.07068802 | 1.17E-09   | 1.62E-07   | 0.06233517 | 6.09E-07   | 0.11525385 | 7.24E-35   |
| 0.14593594 | 0.651892   | 2.06E-09   | 1.19E-27   | 0.10522592 | 0.58252039 | 5.84E-09   |
| 0.45096109 | 0.13768221 | 1.51E-07   | 2.41E-13   | 0.03078544 | 0.02795153 | 9.34E-07   |
| 0.56619621 | 0.99920019 | 0.08649248 | 0.03821723 | 0.5323024  | 0.0779519  | 0.48940511 |
| 0.09697645 | 0.14340787 | 2.00E-05   | 3.82E-24   | 0.40832637 | 0.46318199 | 5.61E-06   |
| 0.45500777 | 1.27E-05   | 3.25E-05   | 0.22953677 | 7.40E-08   | 0.96978326 | 1.42E-49   |
| 0.47314526 | 1.09E-22   | 0.03461425 | 0.00015342 | 0.02302139 | 1.00E-07   | 0.10177455 |
| 0.67151849 | 0.40431807 | 0.36873436 | 0.95959596 | 0.98809273 | 0.94866529 | 0.96292831 |
| 0.40373213 | 0.84429537 | 3.25E-21   | 3.61E-10   | 0.0176423  | 2.45E-06   | 1.22E-81   |
| 0.85504077 | 0.74050996 | 9.59E-05   | 5.69E-07   | 0.00954433 | 0.01389318 | 1.87E-10   |
| 0.71496588 | 0.74371008 | 0.40023678 | 0.17407963 | 0.93580291 | 0.92804719 | 0.50797786 |
| 0.34123958 | 0.36311932 | 1.09E-19   | 1.09E-06   | 5.04E-07   | 4.50E-09   | 5.45E-170  |
| 0.46731698 | 0.61620961 | 1.26E-13   | 2.06E-33   | 0.69736912 | 0.15690334 | 7.76E-07   |
| 0.25137264 | 1.50E-10   | 7.55E-07   | 0.05072362 | 0.37924523 | 1.41E-12   | 6.84E-06   |
| 0.00422957 | 0.03142232 | 0.0768489  | 0.00015735 | 0.58611903 | 0.01210484 | 0.00242071 |

|            |            |            |            |            |            |            |
|------------|------------|------------|------------|------------|------------|------------|
| 0.62492022 | 0.27813266 | 0.00016218 | 0.87261149 | 2.59E-06   | 5.47E-15   | 8.01E-06   |
| 0.22514922 | 0.71426161 | 0.60639387 | 0.73818787 | 0.86900161 | 0.20921229 | 1.84E-22   |
| 0.06249926 | 0.68470317 | 0.01293738 | 0.29886363 | 0.89732922 | 1.13E-05   | 6.67E-07   |
| 0.84387716 | 0.00577474 | 1.83E-07   | 0.89249464 | 0.05624208 | 3.71E-08   | 1.12E-05   |
| 0.24296713 | 0.6540555  | 0.51221864 | 0.80094124 | 0.85519703 | 0.14653379 | 1.06E-23   |
| 0.14279617 | 6.23E-06   | 0.03213478 | 0.71987016 | 0.43818979 | 0.08396069 | 0.33782385 |
| 0.31529514 | 0.95018784 | 0.0427451  | 0.08952895 | 0.98404007 | 0.89977015 | 0.36761414 |
| 0.64490877 | 0.81015181 | 4.13E-21   | 1.19E-24   | 0.10942889 | 0.02888067 | 8.32E-18   |
| 0.00637502 | 2.72E-05   | 5.24E-05   | 0.16328003 | 0.08721499 | 0.12600687 | 5.89E-29   |
| 0.39098092 | 0.00329177 | 2.65E-13   | 0.00011986 | 2.31E-08   | 0.05999998 | 4.38E-98   |
| 0.21940496 | 0.89239297 | 0.00932084 | 5.28E-05   | 0.94070061 | 0.00040652 | 0.04344953 |
| 0.44307598 | 0.27738259 | 8.45E-14   | 9.10E-07   | 9.23E-05   | 1.62E-05   | 3.63E-11   |
| 0.23458793 | 0.70736038 | 0.53031541 | 0.75296321 | 0.81876202 | 0.171284   | 9.79E-24   |
| 0.03814051 | 0.00263349 | 3.07E-15   | 2.05E-14   | 0.67080895 | 5.65E-05   | 5.69E-29   |
| 0.31380614 | 0.88384665 | 0.00069617 | 2.03E-05   | 0.00186821 | 0.50073108 | 4.83E-06   |
| 0.60200746 | 0.07538257 | 2.05E-07   | 0.02097879 | 0.38494234 | 0.03588499 | 1.12E-08   |
| 0.15762683 | 0.00762646 | 1.17E-22   | 4.44E-11   | 0.00081067 | 0.00047317 | 7.46E-70   |
| 0.79010219 | 8.95E-14   | 0.05507123 | 0.05700517 | 0.03502193 | 0.00771504 | 0.01001269 |
| 0.60669154 | 4.63E-05   | 7.64E-08   | 0.02235664 | 4.85E-11   | 2.97E-06   | 3.70E-19   |
| 0.61835413 | 0.42775401 | 1.53E-06   | 0.00013892 | 0.41537755 | 0.33127744 | 0.28049081 |
| 0.46163185 | 4.65E-05   | 0.00029964 | 0.07841555 | 1.12E-06   | 0.48230476 | 4.42E-60   |
| 0.2487516  | 0.16134448 | 7.00E-05   | 4.49E-07   | 0.00041128 | 0.03239809 | 0.28179524 |
| 0.04146152 | 0.07862302 | 0.02079552 | 0.0337601  | 0.04653961 | 1.79E-06   | 8.17E-05   |
| 0.56414486 | 0.63241026 | 4.26E-10   | 1.22E-09   | 3.24E-06   | 2.92E-06   | 1.72E-07   |
| 0.33555513 | 0.00017889 | 0.12956882 | 0.07880842 | 0.02871273 | 0.07862899 | 0.50232988 |
| 0.00883153 | 0.35858604 | 7.56E-09   | 0.00014237 | 0.04275506 | 7.49E-05   | 1.46E-17   |

| PDPK1      | GK         | SLC27A5    | FABP6      | RXRB       | APOA5      | PLIN4      |
|------------|------------|------------|------------|------------|------------|------------|
| 2.15E-24   | 3.79E-13   | 0.16574353 | 1.51E-18   | 0.27292377 | 0.29018439 | 0.03719091 |
| 0.01713954 | 0.25093951 | 0.76578108 | 0.72184914 | 0.37054848 | 0.92242347 | 0.9101429  |
| 1.43E-09   | 1.83E-119  | 0.00064892 | 5.27E-05   | 0.62058399 | 0.00507798 | 0.408924   |
| 0.02905854 | 0.0863389  | 0.72234493 | 1.31E-09   | 0.43681705 | 0.73766944 | 0.00011861 |
| 1.04E-13   | 3.41E-103  | 6.17E-05   | 0.00019011 | 0.3745988  | 0.00048097 | 0.02649444 |
| 0.75176461 | 0.08593074 | 0.06199099 | 0.00333938 | 0.69044882 | 0.31389643 | 0.44343226 |
| 0.14780841 | 5.79E-09   | 0.10956547 | 0.04290807 | 0.15197428 | 0.05666574 | 0.72972059 |
| 0.00068551 | 0.00016224 | 0.12438083 | 0.17991994 | 0.34057715 | 0.52435622 | 0.82984906 |
| 0.97998735 | 0.01666489 | 0.07293372 | 0.18460511 | 0.00282302 | 0.35157688 | 0.36893219 |
| 0.00127728 | 3.87E-14   | 2.97E-45   | 4.77E-05   | 1.95E-05   | 2.45E-44   | 0.13611831 |
| 7.30E-20   | 3.39E-11   | 0.26587794 | 0.01343051 | 0.24468837 | 0.5012414  | 0.12526172 |
| 0.8048511  | 0.86294179 | 0.9719131  | 0.14686515 | 0.02811188 | 0.9564093  | 0.00424978 |
| 1.86E-05   | 9.79E-58   | 0.4401791  | 0.12175368 | 0.30487081 | 0.61187806 | 0.19475822 |
| 0.05166273 | 0.77721057 | 0.12486976 | 0.30275072 | 0.875638   | 0.23019505 | 0.91359775 |
| 0.40381759 | 0.00188018 | 0.54305055 | 3.33E-06   | 0.0080959  | 0.67824586 | 0.87672464 |
| 9.42E-14   | 3.11E-17   | 0.21988135 | 2.00E-07   | 0.76652293 | 0.57399473 | 0.00333686 |
| 2.02E-10   | 0.00028487 | 0.89420943 | 3.73E-16   | 0.36725486 | 0.76029577 | 0.3303063  |
| 0.11819181 | 2.18E-06   | 0.28005991 | 0.03942229 | 0.17102519 | 0.84177527 | 0.13176697 |
| 0.03373134 | 8.27E-10   | 0.06039053 | 2.87E-06   | 3.32E-05   | 0.18907226 | 1.61E-15   |
| 7.62E-05   | 4.39E-79   | 2.87E-25   | 0.00117836 | 0.18044669 | 8.24E-23   | 0.37355717 |
| 0          | 2.99E-19   | 0.08493226 | 1.84E-11   | 0.01051819 | 0.20991022 | 0.29869752 |
| 2.99E-19   | 0          | 0.94451187 | 8.62E-05   | 0.26504543 | 0.62830621 | 0.02930712 |
| 0.08493226 | 0.94451187 | 0          | 0.83098821 | 0.12849985 | 0          | 0.51406666 |
| 1.84E-11   | 8.62E-05   | 0.83098821 | 0          | 1.46E-09   | 0.50804904 | 0.25407076 |
| 0.01051819 | 0.26504543 | 0.12849985 | 1.46E-09   | 0          | 0.09366923 | 0.64283333 |
| 0.20991022 | 0.62830621 | 0          | 0.50804904 | 0.09366923 | 0          | 0.70390001 |
| 0.29869752 | 0.02930712 | 0.51406666 | 0.25407076 | 0.64283333 | 0.70390001 | 0          |
| 0.19046883 | 0.90978226 | 0          | 0.42886903 | 0.21381827 | 0          | 0.6171532  |
| 1.07E-78   | 2.66E-66   | 0.25512692 | 1.06E-12   | 0.00885331 | 0.34536694 | 0.01879689 |
| 7.23E-05   | 0.0093876  | 0.28745985 | 0.05949821 | 0.51174119 | 0.58528463 | 0.14719278 |
| 0.00101357 | 2.76E-09   | 0.00184069 | 2.63E-05   | 0.12100202 | 0.13003074 | 1.40E-05   |
| 2.74E-16   | 1.26E-75   | 0.66261615 | 6.08E-08   | 0.16120387 | 0.72329536 | 0.6141474  |
| 0.14892342 | 5.95E-08   | 0.16742133 | 2.65E-06   | 2.21E-06   | 0.62089374 | 0.83692404 |
| 1.93E-46   | 9.26E-20   | 0.65967842 | 1.80E-16   | 2.25E-06   | 0.75250367 | 0.28732484 |
| 0.07335549 | 0.29164121 | 0.77643648 | 0.31135959 | 0.22356499 | 0.94338305 | 0.18073061 |
| 4.13E-07   | 0.03010955 | 0.71661971 | 8.61E-10   | 1.01E-05   | 0.49439272 | 0.43230378 |
| 1.83E-05   | 6.90E-60   | 0.72947621 | 6.64E-05   | 0.030665   | 0.86721509 | 0.58660576 |
| 0.00973556 | 0.00027313 | 0.57745923 | 1.22E-12   | 7.08E-08   | 0.61027869 | 0.00074709 |
| 0.86928264 | 0.67871843 | 0.91179909 | 0.3066227  | 0.05591344 | 0.88959416 | 3.17E-100  |
| 6.14E-38   | 3.36E-99   | 1.29E-05   | 1.49E-08   | 0.15279965 | 3.78E-05   | 0.05851233 |
| 4.13E-08   | 3.25E-13   | 0.78816694 | 0.0160069  | 0.72711422 | 0.84210186 | 0.59163156 |
| 0.56011724 | 0.44875109 | 0.83136155 | 0.77979999 | 0.00121287 | 0.78303811 | 4.78E-89   |
| 2.63E-09   | 3.28E-97   | 0.05947793 | 0.00048675 | 0.17398634 | 0.261917   | 0.11619617 |
| 6.02E-38   | 1.20E-14   | 0.70596452 | 6.60E-16   | 0.00216796 | 0.53913098 | 0.23049273 |
| 0.22725604 | 0.00210136 | 0.06698444 | 8.18E-05   | 0.00092045 | 0.39664926 | 0.80542339 |
| 0.12389967 | 0.68545386 | 0.77936285 | 0.87430662 | 3.23E-23   | 0.78196096 | 0.2659073  |

|            |            |            |            |            |            |            |
|------------|------------|------------|------------|------------|------------|------------|
| 0.48067212 | 4.43E-05   | 0.00020305 | 7.84E-07   | 0.00028699 | 0.00281802 | 7.00E-13   |
| 0.20128705 | 0.65757219 | 0          | 0.48871863 | 0.12795678 | 0          | 0.71741085 |
| 5.85E-13   | 6.66E-17   | 0.61940878 | 0.30877079 | 1.56E-06   | 0.39715678 | 0.80763916 |
| 3.10E-06   | 2.81E-11   | 0.04337983 | 0.01472773 | 3.07E-15   | 0.22749694 | 0.2238874  |
| 0.20907609 | 0.72850752 | 0          | 0.51252979 | 0.08394507 | 0          | 0.64989397 |
| 0.67585658 | 0.06192917 | 0.40057474 | 2.90E-05   | 0.00019936 | 0.93843745 | 4.82E-16   |
| 0.54564322 | 0.27670325 | 0.51613831 | 0.05375374 | 0.19653554 | 0.94956667 | 9.45E-33   |
| 1.85E-12   | 6.66E-16   | 0.76150591 | 2.49E-09   | 0.00879859 | 0.61800648 | 0.95690578 |
| 8.53E-32   | 3.80E-69   | 0.50562648 | 0.00013905 | 0.80972086 | 0.86308944 | 0.91621691 |
| 5.85E-10   | 4.97E-85   | 0.40563739 | 3.14E-06   | 0.83467885 | 0.7306385  | 0.85348101 |
| 0.01761481 | 0.66123256 | 0.18321387 | 0.83283056 | 0.05035982 | 0.13019233 | 0.10945883 |
| 1.03E-06   | 3.29E-10   | 1.23E-06   | 0.18143129 | 0.55640107 | 0.00050546 | 9.19E-16   |
| 0.20624497 | 0.74452721 | 0          | 0.50797099 | 0.0935186  | 0          | 0.70315114 |
| 1.06E-30   | 9.11E-38   | 1.85E-06   | 2.05E-07   | 8.38E-06   | 2.82E-07   | 0.25678124 |
| 0.0580195  | 4.54E-07   | 0.11544131 | 0.42686123 | 1.45E-06   | 0.46332634 | 0.00071208 |
| 2.58E-05   | 2.92E-12   | 0.89823334 | 0.47867909 | 0.0926249  | 0.84742874 | 0.04677083 |
| 3.33E-43   | 7.97E-98   | 0.82560091 | 2.81E-09   | 0.98249536 | 0.59153996 | 0.6930634  |
| 3.14E-08   | 6.03E-10   | 0.23976524 | 0.02608528 | 8.25E-07   | 0.36208018 | 0.39054115 |
| 6.29E-07   | 2.81E-36   | 0.38286909 | 0.00015031 | 4.55E-07   | 0.89179944 | 1.39E-08   |
| 0.00120721 | 0.00013973 | 1.30E-08   | 0.01904179 | 0.0022873  | 1.64E-09   | 0.83362118 |
| 0.00239085 | 2.72E-50   | 0.42842882 | 0.00035133 | 0.05214541 | 0.58755696 | 0.71903758 |
| 2.41E-06   | 0.1763148  | 0.41495199 | 3.57E-09   | 0.00131312 | 0.39452626 | 2.81E-08   |
| 3.29E-07   | 0.08442371 | 0.03697946 | 5.45E-12   | 6.40E-19   | 0.21605792 | 0.17696505 |
| 3.81E-32   | 5.03E-20   | 0.02666474 | 6.25E-09   | 0.9905767  | 0.05339895 | 2.73E-05   |
| 0.14515661 | 0.57548055 | 0.7415279  | 0.00687625 | 0.00769133 | 0.79570575 | 9.23E-13   |
| 6.04E-37   | 1.29E-36   | 0.43584654 | 6.69E-06   | 0.08882505 | 0.52779445 | 0.00552962 |

| APOA2      | PPARA      | FABP7      | SLC27A4    | SLC27A2    | SCD        | CPT1A      |
|------------|------------|------------|------------|------------|------------|------------|
| 0.29295344 | 7.84E-24   | 1.42E-05   | 7.94E-22   | 0.00278807 | 3.90E-08   | 3.59E-09   |
| 0.89766389 | 0.03574915 | 0.79303057 | 0.52189909 | 0.13837173 | 0.82214824 | 0.03969138 |
| 0.00571443 | 1.15E-54   | 0.00087478 | 7.80E-11   | 1.97E-77   | 4.23E-08   | 1.47E-08   |
| 0.9852173  | 2.57E-05   | 0.2094033  | 3.70E-06   | 0.06184762 | 0.00013711 | 1.69E-16   |
| 0.00042018 | 5.71E-60   | 0.00389594 | 1.66E-09   | 1.44E-68   | 3.98E-10   | 3.38E-10   |
| 0.8259628  | 0.49529093 | 0.23300294 | 5.77E-16   | 5.62E-05   | 9.15E-13   | 0.07786298 |
| 0.01693931 | 0.20154074 | 0.16540316 | 0.0136185  | 4.40E-32   | 0.29758334 | 0.35596111 |
| 0.35557098 | 0.79429802 | 0.01560819 | 1.26E-13   | 0.02854636 | 3.18E-13   | 0.45116392 |
| 0.27111597 | 0.24987844 | 0.81636889 | 5.43E-09   | 0.40331309 | 0.03658685 | 0.00036501 |
| 9.16E-44   | 5.83E-11   | 0.25497581 | 0.03156658 | 2.94E-10   | 0.21851384 | 0.71874562 |
| 0.69598355 | 1.51E-24   | 0.01807171 | 0.02553318 | 1.82E-10   | 0.00010635 | 4.31E-15   |
| 0.99089219 | 0.54361959 | 0.29951793 | 0.00011202 | 0.10255952 | 0.09620034 | 0.59797255 |
| 0.78893212 | 1.40E-34   | 0.08224746 | 8.61E-06   | 9.77E-26   | 0.00154059 | 0.00040851 |
| 0.24316165 | 0.16007246 | 0.58178635 | 0.78157251 | 0.07068802 | 0.14593594 | 0.45096109 |
| 0.93711036 | 0.83270373 | 0.89785645 | 0.0409124  | 1.17E-09   | 0.651892   | 0.13768221 |
| 0.57950889 | 1.32E-27   | 0.00413848 | 5.79E-20   | 1.62E-07   | 2.06E-09   | 1.51E-07   |
| 0.72606997 | 6.33E-10   | 0.00047039 | 6.69E-18   | 0.06233517 | 1.19E-27   | 2.41E-13   |
| 0.85484838 | 0.0003352  | 0.68996068 | 4.40E-09   | 6.09E-07   | 0.10522592 | 0.03078544 |
| 0.09503848 | 0.13479889 | 0.81405531 | 1.53E-14   | 0.11525385 | 0.58252039 | 0.02795153 |
| 1.24E-21   | 2.51E-37   | 0.00563633 | 1.05E-10   | 7.24E-35   | 5.84E-09   | 9.34E-07   |
| 0.19046883 | 1.07E-78   | 7.23E-05   | 0.00101357 | 2.74E-16   | 0.14892342 | 1.93E-46   |
| 0.90978226 | 2.66E-66   | 0.0093876  | 2.76E-09   | 1.26E-75   | 5.95E-08   | 9.26E-20   |
| 0          | 0.25512692 | 0.28745985 | 0.00184069 | 0.66261615 | 0.16742133 | 0.65967842 |
| 0.42886903 | 1.06E-12   | 0.05949821 | 2.63E-05   | 6.08E-08   | 2.65E-06   | 1.80E-16   |
| 0.21381827 | 0.00885331 | 0.51174119 | 0.12100202 | 0.16120387 | 2.21E-06   | 2.25E-06   |
| 0          | 0.34536694 | 0.58528463 | 0.13003074 | 0.72329536 | 0.62089374 | 0.75250367 |
| 0.6171532  | 0.01879689 | 0.14719278 | 1.40E-05   | 0.6141474  | 0.83692404 | 0.28732484 |
| 0          | 0.36293134 | 0.44428779 | 0.13090718 | 0.87952099 | 0.47566015 | 0.62096763 |
| 0.36293134 | 0          | 1.57E-05   | 2.58E-11   | 3.92E-42   | 4.80E-06   | 6.27E-67   |
| 0.44428779 | 1.57E-05   | 0          | 2.86E-07   | 0.03416879 | 0.0039846  | 0.0003882  |
| 0.13090718 | 2.58E-11   | 2.86E-07   | 0          | 0.18047536 | 2.15E-20   | 1.12E-20   |
| 0.87952099 | 3.92E-42   | 0.03416879 | 0.18047536 | 0          | 0.00107073 | 5.13E-13   |
| 0.47566015 | 4.80E-06   | 0.0039846  | 2.15E-20   | 0.00107073 | 0          | 5.00E-09   |
| 0.62096763 | 6.27E-67   | 0.0003882  | 1.12E-20   | 5.13E-13   | 5.00E-09   | 0          |
| 0.95832515 | 0.01368506 | 0.49932521 | 0.19504946 | 0.0421951  | 0.90657993 | 0.01704989 |
| 0.42961292 | 5.52E-08   | 0.00526327 | 3.93E-05   | 0.09777991 | 9.83E-22   | 0.00028307 |
| 0.57206253 | 3.78E-29   | 0.03496538 | 0.03717123 | 6.36E-77   | 7.12E-06   | 2.57E-18   |
| 0.49007716 | 1.03E-07   | 0.86789374 | 0.43156847 | 3.68E-11   | 3.17E-05   | 1.74E-16   |
| 0.85172188 | 0.93990896 | 0.75066066 | 0.43131112 | 0.6050705  | 0.35908446 | 0.87852111 |
| 4.72E-05   | 7.51E-104  | 0.00010291 | 6.32E-16   | 1.02E-67   | 6.00E-08   | 8.53E-40   |
| 0.83480461 | 5.83E-15   | 0.11407728 | 7.67E-10   | 5.84E-10   | 0.00014483 | 9.02E-08   |
| 0.76830312 | 0.6005668  | 0.91183763 | 0.46383806 | 0.35689339 | 0.00882496 | 0.69630374 |
| 0.19622361 | 1.94E-48   | 0.00333853 | 1.35E-15   | 5.94E-48   | 1.55E-15   | 1.42E-11   |
| 0.49901056 | 1.14E-33   | 1.32E-05   | 3.18E-39   | 0.00510586 | 0.00029045 | 7.91E-44   |
| 0.30287438 | 0.01277839 | 0.0038187  | 1.59E-15   | 2.57E-06   | 0.0066556  | 0.05988469 |
| 0.78101749 | 0.51711558 | 0.73224439 | 0.73151175 | 0.00908886 | 0.08748797 | 0.03052162 |

|            |            |            |            |            |            |            |
|------------|------------|------------|------------|------------|------------|------------|
| 0.00092597 | 6.05E-05   | 0.00021901 | 1.10E-07   | 0.18562106 | 0.37097007 | 0.00062775 |
| 0          | 0.35645012 | 0.58418435 | 0.15001944 | 0.70489786 | 0.56529885 | 0.72068723 |
| 0.39085557 | 2.74E-14   | 0.55219647 | 0.21130436 | 3.31E-08   | 0.01593069 | 6.78E-09   |
| 0.17290712 | 4.27E-08   | 0.66175585 | 2.64E-09   | 0.03202603 | 0.31408306 | 2.76E-05   |
| 0          | 0.2799987  | 0.59485492 | 0.12390567 | 0.77381072 | 0.61938229 | 0.78054612 |
| 0.04087218 | 0.04654143 | 0.2166623  | 0.00129541 | 0.00397974 | 0.0238798  | 4.26E-05   |
| 0.9224135  | 0.2294814  | 0.26925151 | 0.00796453 | 0.0203697  | 0.78851151 | 0.32446453 |
| 0.61389782 | 1.49E-11   | 2.03E-05   | 3.57E-19   | 0.00019238 | 1.45E-07   | 2.09E-05   |
| 0.99302654 | 1.20E-51   | 0.04347875 | 0.27980649 | 1.96E-101  | 0.73756982 | 1.80E-18   |
| 0.73600257 | 1.89E-47   | 0.00178967 | 8.62E-08   | 4.87E-75   | 5.70E-08   | 2.85E-13   |
| 0.24863531 | 0.21755246 | 0.71128147 | 0.20720529 | 0.02078309 | 0.02778377 | 0.39434261 |
| 0.00080575 | 2.18E-19   | 0.00029055 | 1.20E-44   | 0.81233853 | 2.47E-06   | 3.28E-15   |
| 0          | 0.32407684 | 0.56474694 | 0.12405431 | 0.77539538 | 0.59293857 | 0.75300248 |
| 3.09E-08   | 1.97E-33   | 0.02526309 | 0.00110067 | 1.63E-32   | 0.02299934 | 4.99E-18   |
| 0.32884956 | 0.0098909  | 0.75062981 | 0.5840193  | 0.03920039 | 0.59666416 | 0.65522172 |
| 0.99998223 | 8.75E-15   | 0.11909481 | 0.08788994 | 2.82E-12   | 0.02473598 | 0.14790961 |
| 0.96267309 | 3.81E-83   | 0.00038466 | 8.91E-09   | 3.61E-65   | 3.31E-07   | 1.98E-37   |
| 0.908893   | 2.91E-08   | 0.38264765 | 2.04E-05   | 1.63E-16   | 0.53217932 | 2.79E-19   |
| 0.92709044 | 3.65E-31   | 0.0007762  | 6.00E-11   | 1.33E-26   | 5.48E-07   | 6.45E-23   |
| 2.69E-09   | 0.00065587 | 0.0056548  | 0.02498253 | 0.00162269 | 1.81E-12   | 0.0035612  |
| 0.32135968 | 4.88E-22   | 0.07989953 | 0.02649195 | 2.46E-48   | 1.04E-05   | 4.42E-15   |
| 0.40399145 | 4.44E-13   | 0.0198344  | 6.53E-05   | 0.06919152 | 0.00307273 | 1.38E-11   |
| 0.38205684 | 0.13907172 | 0.16324094 | 3.48E-07   | 4.11E-06   | 0.34884769 | 2.03E-05   |
| 0.01992422 | 4.86E-54   | 6.97E-06   | 1.10E-26   | 9.90E-09   | 0.01560384 | 2.52E-77   |
| 0.72894022 | 0.94883495 | 0.10048858 | 0.53670741 | 0.00044074 | 0.91814012 | 0.0131741  |
| 0.89094356 | 9.13E-52   | 0.00568899 | 3.08E-07   | 4.20E-53   | 0.00092934 | 2.11E-45   |



| ACSBG1     | SCD5       | CYP4A11    | PLTP       | ADIPOQ     | ACOX1      | ACSL6      |
|------------|------------|------------|------------|------------|------------|------------|
| 0.09852432 | 1.57E-11   | 0.20503948 | 0.0184899  | 0.1441429  | 2.51E-20   | 4.73E-09   |
| 0.79693304 | 0.4383811  | 0.33613511 | 0.58004514 | 0.85915422 | 0.05962389 | 0.37560988 |
| 0.5506091  | 7.08E-06   | 2.02E-72   | 0.01439876 | 0.66911043 | 1.26E-106  | 4.64E-15   |
| 0.02928073 | 0.06987882 | 0.0809427  | 9.79E-11   | 0.70559241 | 0.14123349 | 0.42891356 |
| 0.29943884 | 3.68E-08   | 1.38E-63   | 0.0365797  | 0.88929031 | 1.71E-92   | 6.09E-15   |
| 0.03298499 | 5.43E-12   | 1.10E-08   | 0.00125672 | 0.33430611 | 0.70496913 | 0.0019962  |
| 0.44158368 | 0.00334511 | 6.34E-18   | 0.00034293 | 0.55762581 | 0.00028908 | 0.6642421  |
| 0.77528489 | 0.08239538 | 0.00017492 | 0.61142263 | 0.09959344 | 0.02513588 | 0.00082724 |
| 0.14556799 | 0.37993276 | 0.2719042  | 0.05381587 | 0.67317853 | 0.56788356 | 0.01532539 |
| 0.49202933 | 0.12025218 | 9.74E-10   | 2.32E-07   | 0.98307598 | 4.36E-25   | 0.01888055 |
| 0.10298309 | 3.75E-09   | 3.63E-06   | 2.03E-06   | 0.75828291 | 7.28E-17   | 2.60E-06   |
| 0.42381563 | 0.9520753  | 0.27471226 | 0.34648426 | 0.19996095 | 0.76023058 | 0.07715772 |
| 0.23353672 | 0.00042356 | 8.69E-33   | 0.52838982 | 0.71948081 | 5.90E-43   | 2.42E-13   |
| 0.56619621 | 0.09697645 | 0.45500777 | 0.47314526 | 0.67151849 | 0.40373213 | 0.85504077 |
| 0.99920019 | 0.14340787 | 1.27E-05   | 1.09E-22   | 0.40431807 | 0.84429537 | 0.74050996 |
| 0.08649248 | 2.00E-05   | 3.25E-05   | 0.03461425 | 0.36873436 | 3.25E-21   | 9.59E-05   |
| 0.03821723 | 3.82E-24   | 0.22953677 | 0.00015342 | 0.95959596 | 3.61E-10   | 5.69E-07   |
| 0.5323024  | 0.40832637 | 7.40E-08   | 0.02302139 | 0.98809273 | 0.0176423  | 0.00954433 |
| 0.0779519  | 0.46318199 | 0.96978326 | 1.00E-07   | 0.94866529 | 2.45E-06   | 0.01389318 |
| 0.48940511 | 5.61E-06   | 1.42E-49   | 0.10177455 | 0.96292831 | 1.22E-81   | 1.87E-10   |
| 0.07335549 | 4.13E-07   | 1.83E-05   | 0.00973556 | 0.86928264 | 6.14E-38   | 4.13E-08   |
| 0.29164121 | 0.03010955 | 6.90E-60   | 0.00027313 | 0.67871843 | 3.36E-99   | 3.25E-13   |
| 0.77643648 | 0.71661971 | 0.72947621 | 0.57745923 | 0.91179909 | 1.29E-05   | 0.78816694 |
| 0.31135959 | 8.61E-10   | 6.64E-05   | 1.22E-12   | 0.3066227  | 1.49E-08   | 0.0160069  |
| 0.22356499 | 1.01E-05   | 0.030665   | 7.08E-08   | 0.05591344 | 0.15279965 | 0.72711422 |
| 0.94338305 | 0.49439272 | 0.86721509 | 0.61027869 | 0.88959416 | 3.78E-05   | 0.84210186 |
| 0.18073061 | 0.43230378 | 0.58660576 | 0.00074709 | 3.17E-100  | 0.05851233 | 0.59163156 |
| 0.95832515 | 0.42961292 | 0.57206253 | 0.49007716 | 0.85172188 | 4.72E-05   | 0.83480461 |
| 0.01368506 | 5.52E-08   | 3.78E-29   | 1.03E-07   | 0.93990896 | 7.51E-104  | 5.83E-15   |
| 0.49932521 | 0.00526327 | 0.03496538 | 0.86789374 | 0.75066066 | 0.00010291 | 0.11407728 |
| 0.19504946 | 3.93E-05   | 0.03717123 | 0.43156847 | 0.43131112 | 6.32E-16   | 7.67E-10   |
| 0.0421951  | 0.09777991 | 6.36E-77   | 3.68E-11   | 0.6050705  | 1.02E-67   | 5.84E-10   |
| 0.90657993 | 9.83E-22   | 7.12E-06   | 3.17E-05   | 0.35908446 | 6.00E-08   | 0.00014483 |
| 0.01704989 | 0.00028307 | 2.57E-18   | 1.74E-16   | 0.87852111 | 8.53E-40   | 9.02E-08   |
| 0.0662169  | 0.0662169  | 0.08243472 | 0.06690945 | 0.77645913 | 0.89852924 | 0.48019398 |
| 0.0662169  | 0          | 0.18789007 | 6.61E-05   | 0.29788726 | 1.66E-09   | 6.15E-05   |
| 0.08243472 | 0.18789007 | 0          | 2.45E-06   | 0.55138264 | 4.92E-51   | 5.00E-10   |
| 0.06690945 | 6.61E-05   | 2.45E-06   | 0          | 0.59391496 | 0.00010258 | 0.01957104 |
| 0.77645913 | 0.29788726 | 0.55138264 | 0.59391496 | 0          | 0.85441281 | 0.72801059 |
| 0.89852924 | 1.66E-09   | 4.92E-51   | 0.00010258 | 0.85441281 | 0          | 5.02E-26   |
| 0.48019398 | 6.15E-05   | 5.00E-10   | 0.01957104 | 0.72801059 | 5.02E-26   | 0          |
| 0.80205304 | 0.85485858 | 0.81574792 | 0.2644651  | 1.23E-247  | 0.32988869 | 0.81937106 |
| 0.66622002 | 1.67E-10   | 2.16E-66   | 0.02125426 | 0.86686481 | 7.60E-84   | 1.11E-14   |
| 0.00052175 | 2.90E-09   | 0.09015352 | 0.00056448 | 0.61639351 | 8.32E-33   | 4.01E-14   |
| 0.21102036 | 0.00118006 | 1.08E-06   | 1.02E-08   | 0.03799926 | 0.01050883 | 0.74599749 |
| 0.07075766 | 2.61E-08   | 0.53156903 | 0.0049908  | 0.77876276 | 1.19E-07   | 0.07354222 |

|            |            |            |            |            |            |            |
|------------|------------|------------|------------|------------|------------|------------|
| 0.05195042 | 0.12659404 | 0.00571191 | 0.4882055  | 0.78813065 | 9.16E-05   | 0.15004359 |
| 0.96919053 | 0.51115045 | 0.8417566  | 0.56036819 | 0.9016389  | 4.68E-05   | 0.86160358 |
| 0.0453087  | 0.20246469 | 1.78E-05   | 0.02051395 | 0.0328468  | 5.03E-15   | 0.00861894 |
| 0.15026061 | 1.78E-07   | 0.04833781 | 0.08149919 | 0.66282075 | 1.08E-11   | 1.02E-05   |
| 0.94736242 | 0.49921966 | 0.79303913 | 0.72036511 | 0.88619057 | 2.12E-05   | 0.8710473  |
| 0.2901659  | 0.26169099 | 0.00056319 | 0.00071484 | 1.57E-22   | 0.13054111 | 0.00026934 |
| 4.36E-08   | 0.76078121 | 0.03489938 | 0.78549249 | 1.00E-42   | 0.93092094 | 0.5043675  |
| 0.31252555 | 2.02E-17   | 0.01109386 | 0.46323771 | 0.2836137  | 7.55E-27   | 5.90E-10   |
| 0.03794743 | 0.10347081 | 2.63E-80   | 2.97E-07   | 0.17164379 | 4.56E-79   | 5.71E-10   |
| 0.38938071 | 4.37E-05   | 1.68E-74   | 0.0010553  | 0.86511289 | 6.44E-83   | 8.41E-14   |
| 0.97336331 | 0.65299505 | 0.19697193 | 0.44959286 | 0.16507919 | 0.46285453 | 0.10053962 |
| 0.0129569  | 0.24379829 | 0.37978728 | 0.423222   | 0.00817448 | 2.69E-09   | 0.00173997 |
| 0.96590077 | 0.50012785 | 0.79244136 | 0.61632264 | 0.8804951  | 2.61E-05   | 0.88515994 |
| 0.97600642 | 3.63E-07   | 1.98E-20   | 5.09E-05   | 0.58170797 | 1.20E-66   | 3.69E-11   |
| 0.61390108 | 0.38774627 | 0.01604851 | 0.01117679 | 0.76198955 | 4.70E-14   | 0.0825047  |
| 0.99840515 | 0.06508711 | 9.51E-08   | 0.81976151 | 0.3020531  | 1.53E-18   | 0.00020039 |
| 0.64682834 | 5.81E-14   | 1.03E-49   | 4.52E-09   | 0.95387703 | 2.83E-118  | 1.02E-18   |
| 0.64820058 | 5.65E-05   | 8.86E-16   | 9.92E-18   | 0.19506998 | 0.00531059 | 0.46656503 |
| 0.26272239 | 0.55169382 | 6.49E-40   | 1.75E-07   | 0.00102064 | 1.37E-25   | 1.83E-06   |
| 0.70896275 | 2.55E-05   | 0.28676857 | 0.08553424 | 0.73950164 | 0.00852913 | 0.04523083 |
| 0.14785179 | 0.10010149 | 9.63E-207  | 3.57E-05   | 0.82949221 | 1.38E-43   | 3.74E-08   |
| 0.16879633 | 3.76E-07   | 0.13834661 | 6.08E-06   | 1.40E-16   | 1.80E-06   | 6.46E-06   |
| 0.10862581 | 0.33389657 | 0.07465758 | 1.00E-06   | 0.89093454 | 0.83500526 | 0.15765331 |
| 0.00107906 | 0.61254231 | 3.00E-11   | 3.38E-06   | 0.6549296  | 7.60E-30   | 2.87E-08   |
| 0.45937198 | 0.32673002 | 2.36E-08   | 0.00478394 | 1.88E-23   | 0.77968862 | 0.11418395 |
| 0.90698674 | 0.0001448  | 2.89E-48   | 7.30E-08   | 0.57493451 | 8.41E-64   | 3.92E-13   |

| PLIN1      | ACAA1      | ACSL3      | CD36       | CPT1B      | FABP3      | CYP7A1     |
|------------|------------|------------|------------|------------|------------|------------|
| 0.96324183 | 8.15E-12   | 9.31E-36   | 1.24E-07   | 0.0115817  | 0.64763203 | 0.30109684 |
| 0.79187671 | 0.20977506 | 0.1445733  | 0.90643986 | 0.61526016 | 0.20805087 | 0.9446308  |
| 0.38543461 | 1.25E-170  | 2.57E-06   | 0.00012064 | 0.00117761 | 5.31E-05   | 0.00619686 |
| 0.92243422 | 0.4107213  | 1.85E-10   | 4.34E-14   | 2.38E-05   | 0.12714498 | 0.76392435 |
| 0.88091059 | 5.33E-138  | 6.49E-06   | 0.00015246 | 0.00158213 | 1.01E-07   | 0.00055996 |
| 0.65870207 | 0.00068952 | 2.63E-08   | 2.90E-11   | 0.83537703 | 0.01552282 | 0.37177073 |
| 0.87671737 | 0.00222818 | 6.40E-08   | 3.17E-06   | 0.70922752 | 0.81453339 | 0.05026432 |
| 0.06073649 | 3.12E-08   | 0.96625845 | 0.00016765 | 0.24369032 | 0.00012593 | 0.53671471 |
| 0.96292377 | 0.28849995 | 0.00067956 | 0.00409143 | 0.43604291 | 0.40101317 | 0.32456885 |
| 0.79545648 | 4.49E-23   | 0.68115067 | 1.04E-08   | 0.00172651 | 3.33E-07   | 1.54E-44   |
| 0.87803408 | 1.33E-12   | 1.81E-05   | 0.00037603 | 0.10730094 | 0.00072    | 0.54579267 |
| 0.28092883 | 0.70670285 | 2.63E-07   | 0.04448266 | 0.8225882  | 0.13289775 | 0.95546718 |
| 0.19088502 | 3.06E-66   | 0.00015554 | 9.72E-05   | 0.1276052  | 0.28774737 | 0.56833483 |
| 0.71496588 | 0.34123958 | 0.46731698 | 0.25137264 | 0.00422957 | 0.62492022 | 0.22514922 |
| 0.74371008 | 0.36311932 | 0.61620961 | 1.50E-10   | 0.03142232 | 0.27813266 | 0.71426161 |
| 0.40023678 | 1.09E-19   | 1.26E-13   | 7.55E-07   | 0.0768489  | 0.00016218 | 0.60639387 |
| 0.17407963 | 1.09E-06   | 2.06E-33   | 0.05072362 | 0.00015735 | 0.87261149 | 0.73818787 |
| 0.93580291 | 5.04E-07   | 0.69736912 | 0.37924523 | 0.58611903 | 2.59E-06   | 0.86900161 |
| 0.92804719 | 4.50E-09   | 0.15690334 | 1.41E-12   | 0.01210484 | 5.47E-15   | 0.20921229 |
| 0.50797786 | 5.45E-170  | 7.76E-07   | 6.84E-06   | 0.00242071 | 8.01E-06   | 1.84E-22   |
| 0.56011724 | 2.63E-09   | 6.02E-38   | 0.22725604 | 0.12389967 | 0.48067212 | 0.20128705 |
| 0.44875109 | 3.28E-97   | 1.20E-14   | 0.00210136 | 0.68545386 | 4.43E-05   | 0.65757219 |
| 0.83136155 | 0.05947793 | 0.70596452 | 0.06698444 | 0.77936285 | 0.00020305 | 0          |
| 0.77979999 | 0.00048675 | 6.60E-16   | 8.18E-05   | 0.87430662 | 7.84E-07   | 0.48871863 |
| 0.00121287 | 0.17398634 | 0.00216796 | 0.00092045 | 3.23E-23   | 0.00028699 | 0.12795678 |
| 0.78303811 | 0.261917   | 0.53913098 | 0.39664926 | 0.78196096 | 0.00281802 | 0          |
| 4.78E-89   | 0.11619617 | 0.23049273 | 0.80542339 | 0.2659073  | 7.00E-13   | 0.71741085 |
| 0.76830312 | 0.19622361 | 0.49901056 | 0.30287438 | 0.78101749 | 0.00092597 | 0          |
| 0.6005668  | 1.94E-48   | 1.14E-33   | 0.01277839 | 0.51711558 | 6.05E-05   | 0.35645012 |
| 0.91183763 | 0.00333853 | 1.32E-05   | 0.0038187  | 0.73224439 | 0.00021901 | 0.58418435 |
| 0.46383806 | 1.35E-15   | 3.18E-39   | 1.59E-15   | 0.73151175 | 1.10E-07   | 0.15001944 |
| 0.35689339 | 5.94E-48   | 0.00510586 | 2.57E-06   | 0.00908886 | 0.18562106 | 0.70489786 |
| 0.00882496 | 1.55E-15   | 0.00029045 | 0.0066556  | 0.08748797 | 0.37097007 | 0.56529885 |
| 0.69630374 | 1.42E-11   | 7.91E-44   | 0.05988469 | 0.03052162 | 0.00062775 | 0.72068723 |
| 0.80205304 | 0.66622002 | 0.00052175 | 0.21102036 | 0.07075766 | 0.05195042 | 0.96919053 |
| 0.85485858 | 1.67E-10   | 2.90E-09   | 0.00118006 | 2.61E-08   | 0.12659404 | 0.51115045 |
| 0.81574792 | 2.16E-66   | 0.09015352 | 1.08E-06   | 0.53156903 | 0.00571191 | 0.8417566  |
| 0.2644651  | 0.02125426 | 0.00056448 | 1.02E-08   | 0.0049908  | 0.4882055  | 0.56036819 |
| 1.23E-247  | 0.86686481 | 0.61639351 | 0.03799926 | 0.77876276 | 0.78813065 | 0.9016389  |
| 0.32988869 | 7.60E-84   | 8.32E-33   | 0.01050883 | 1.19E-07   | 9.16E-05   | 4.68E-05   |
| 0.81937106 | 1.11E-14   | 4.01E-14   | 0.74599749 | 0.07354222 | 0.15004359 | 0.86160358 |
| 0          | 0.70699738 | 0.54873442 | 0.00530206 | 0.18467177 | 0.93376428 | 0.79657962 |
| 0.70699738 | 0          | 6.30E-09   | 8.51E-08   | 0.02909636 | 1.24E-07   | 0.27073711 |
| 0.54873442 | 6.30E-09   | 0          | 0.00978576 | 0.00014492 | 0.31007326 | 0.52084295 |
| 0.00530206 | 8.51E-08   | 0.00978576 | 0          | 0.26870673 | 0.00127213 | 0.41836515 |
| 0.18467177 | 0.02909636 | 0.00014492 | 0.26870673 | 0          | 0.86255302 | 0.80974937 |

|            |            |            |            |            |            |            |
|------------|------------|------------|------------|------------|------------|------------|
| 0.93376428 | 1.24E-07   | 0.31007326 | 0.00127213 | 0.86255302 | 0          | 0.00277004 |
| 0.79657962 | 0.27073711 | 0.52084295 | 0.41836515 | 0.80974937 | 0.00277004 | 0          |
| 0.00333715 | 2.40E-10   | 0.0028364  | 0.00031307 | 0.13914303 | 3.73E-10   | 0.3838213  |
| 0.28451785 | 2.54E-06   | 4.47E-12   | 8.01E-08   | 0.10607343 | 1.48E-05   | 0.22946352 |
| 0.78010169 | 0.18488578 | 0.52978783 | 0.3449973  | 0.7351112  | 0.00285516 | 0          |
| 4.79E-22   | 0.20583712 | 0.09906706 | 1.04E-06   | 0.01452512 | 0.05702061 | 0.6904386  |
| 1.93E-46   | 0.37920633 | 0.00549562 | 0.38150796 | 0.26099047 | 0.24506809 | 0.97675211 |
| 0.66045261 | 2.91E-18   | 1.22E-57   | 5.75E-08   | 4.66E-11   | 0.31692976 | 0.60894006 |
| 0.43900353 | 7.76E-40   | 5.34E-05   | 2.66E-05   | 6.98E-06   | 0.00094702 | 0.84377601 |
| 0.66556542 | 1.46E-119  | 5.83E-09   | 0.84550258 | 0.0029224  | 0.00909001 | 0.77072519 |
| 0.18167184 | 0.64513246 | 0.01856295 | 0.12870262 | 0.02735295 | 0.06652559 | 0.14577181 |
| 0.03879347 | 2.10E-12   | 3.94E-19   | 3.75E-10   | 0.00139559 | 4.52E-09   | 0.00059847 |
| 0.76637755 | 0.19756581 | 0.54805063 | 0.34780801 | 0.74344742 | 0.00227031 | 0          |
| 0.06066845 | 9.47E-29   | 2.24E-41   | 0.21743431 | 3.79E-15   | 3.86E-07   | 1.87E-07   |
| 0.49802051 | 1.14E-06   | 1.24E-10   | 0.15510055 | 5.39E-10   | 0.00022315 | 0.45903133 |
| 0.46671556 | 3.10E-11   | 0.00078157 | 0.11379981 | 0.34962099 | 0.05431146 | 0.85236809 |
| 0.2897242  | 7.44E-99   | 2.73E-36   | 0.24451249 | 2.71E-08   | 2.01E-05   | 0.62895678 |
| 0.78404359 | 0.5918366  | 0.40811271 | 1.98E-17   | 1.37E-14   | 0.3653117  | 0.458779   |
| 0.00113307 | 2.41E-33   | 0.00037871 | 0.08221324 | 1.46E-07   | 3.11E-08   | 0.90592668 |
| 0.83515438 | 2.02E-05   | 0.00061288 | 0.11187095 | 0.46861938 | 0.47038462 | 1.87E-09   |
| 0.9504382  | 2.28E-80   | 0.05616249 | 4.44E-06   | 0.34962819 | 0.00644601 | 0.55806313 |
| 1.43E-11   | 0.03413401 | 5.76E-14   | 4.62E-09   | 0.00410398 | 0.78319497 | 0.43326803 |
| 0.78395992 | 0.00284318 | 0.34340455 | 3.71E-13   | 0.0041509  | 0.00046794 | 0.25835247 |
| 0.32628525 | 6.12E-13   | 1.61E-40   | 0.74360226 | 0.84335049 | 3.74E-16   | 0.05202652 |
| 6.20E-22   | 0.4257871  | 0.36631519 | 3.22E-76   | 0.04094971 | 0.6035802  | 0.80541743 |
| 0.25412534 | 6.20E-39   | 1.42E-11   | 0.04301665 | 2.07E-06   | 1.22E-14   | 0.55122702 |

| CPT1C      | PPARD      | APOC3      | RXRG       | UCP1       | ACSL4      | EHHADH     |
|------------|------------|------------|------------|------------|------------|------------|
| 0.01364262 | 4.16E-13   | 0.27427761 | 0.02328419 | 0.01070604 | 3.23E-24   | 0.00933033 |
| 0.81871484 | 0.55062707 | 0.91584845 | 0.3715872  | 0.6619359  | 0.90211834 | 0.12093489 |
| 6.57E-08   | 1.94E-06   | 0.00269656 | 0.17277439 | 0.24718379 | 9.94E-16   | 1.00E-56   |
| 0.00056621 | 0.20705303 | 0.67107799 | 0.00012438 | 3.75E-05   | 0.05459916 | 0.60758864 |
| 1.50E-08   | 1.02E-05   | 0.00025601 | 0.03134379 | 0.52168869 | 4.71E-16   | 2.78E-55   |
| 0.02640205 | 0.81868422 | 0.33473181 | 0.41470581 | 0.02466742 | 4.40E-12   | 8.85E-19   |
| 0.00431217 | 0.98595827 | 0.05171825 | 0.01393586 | 0.04637136 | 1.78E-08   | 4.56E-16   |
| 0.07100254 | 1.82E-08   | 0.51482878 | 0.04549558 | 0.73074464 | 0.5634169  | 0.35361761 |
| 1.57E-06   | 0.37881575 | 0.33893797 | 0.00534261 | 0.12995979 | 0.80345286 | 0.05655378 |
| 2.39E-05   | 0.00052095 | 2.57E-45   | 0.40065247 | 0.3973914  | 2.53E-06   | 8.04E-11   |
| 9.50E-26   | 2.70E-05   | 0.46702054 | 0.00440726 | 0.79193737 | 8.35E-06   | 6.53E-14   |
| 0.60154559 | 0.04823732 | 0.9539087  | 0.54101608 | 0.00183177 | 8.18E-11   | 0.12209739 |
| 0.22121159 | 0.00454914 | 0.68592166 | 0.00067217 | 0.00185759 | 7.90E-06   | 5.51E-23   |
| 0.06249926 | 0.84387716 | 0.24296713 | 0.14279617 | 0.31529514 | 0.64490877 | 0.00637502 |
| 0.68470317 | 0.00577474 | 0.6540555  | 6.23E-06   | 0.95018784 | 0.81015181 | 2.72E-05   |
| 0.01293738 | 1.83E-07   | 0.51221864 | 0.03213478 | 0.0427451  | 4.13E-21   | 5.24E-05   |
| 0.29886363 | 0.89249464 | 0.80094124 | 0.71987016 | 0.08952895 | 1.19E-24   | 0.16328003 |
| 0.89732922 | 0.05624208 | 0.85519703 | 0.43818979 | 0.98404007 | 0.10942889 | 0.08721499 |
| 1.13E-05   | 3.71E-08   | 0.14653379 | 0.08396069 | 0.89977015 | 0.02888067 | 0.12600687 |
| 6.67E-07   | 1.12E-05   | 1.06E-23   | 0.33782385 | 0.36761414 | 8.32E-18   | 5.89E-29   |
| 5.85E-13   | 3.10E-06   | 0.20907609 | 0.67585658 | 0.54564322 | 1.85E-12   | 8.53E-32   |
| 6.66E-17   | 2.81E-11   | 0.72850752 | 0.06192917 | 0.27670325 | 6.66E-16   | 3.80E-69   |
| 0.61940878 | 0.04337983 | 0          | 0.40057474 | 0.51613831 | 0.76150591 | 0.50562648 |
| 0.30877079 | 0.01472773 | 0.51252979 | 2.90E-05   | 0.05375374 | 2.49E-09   | 0.00013905 |
| 1.56E-06   | 3.07E-15   | 0.08394507 | 0.00019936 | 0.19653554 | 0.00879859 | 0.80972086 |
| 0.39715678 | 0.22749694 | 0          | 0.93843745 | 0.94956667 | 0.61800648 | 0.86308944 |
| 0.80763916 | 0.2238874  | 0.64989397 | 4.82E-16   | 9.45E-33   | 0.95690578 | 0.91621691 |
| 0.39085557 | 0.17290712 | 0          | 0.04087218 | 0.9224135  | 0.61389782 | 0.99302654 |
| 2.74E-14   | 4.27E-08   | 0.2799987  | 0.04654143 | 0.2294814  | 1.49E-11   | 1.20E-51   |
| 0.55219647 | 0.66175585 | 0.59485492 | 0.2166623  | 0.26925151 | 2.03E-05   | 0.04347875 |
| 0.21130436 | 2.64E-09   | 0.12390567 | 0.00129541 | 0.00796453 | 3.57E-19   | 0.27980649 |
| 3.31E-08   | 0.03202603 | 0.77381072 | 0.00397974 | 0.0203697  | 0.00019238 | 1.96E-101  |
| 0.01593069 | 0.31408306 | 0.61938229 | 0.0238798  | 0.78851151 | 1.45E-07   | 0.73756982 |
| 6.78E-09   | 2.76E-05   | 0.78054612 | 4.26E-05   | 0.32446453 | 2.09E-05   | 1.80E-18   |
| 0.0453087  | 0.15026061 | 0.94736242 | 0.2901659  | 4.36E-08   | 0.31252555 | 0.03794743 |
| 0.20246469 | 1.78E-07   | 0.49921966 | 0.26169099 | 0.76078121 | 2.02E-17   | 0.10347081 |
| 1.78E-05   | 0.04833781 | 0.79303913 | 0.00056319 | 0.03489938 | 0.01109386 | 2.63E-80   |
| 0.02051395 | 0.08149919 | 0.72036511 | 0.00071484 | 0.78549249 | 0.46323771 | 2.97E-07   |
| 0.0328468  | 0.66282075 | 0.88619057 | 1.57E-22   | 1.00E-42   | 0.2836137  | 0.17164379 |
| 5.03E-15   | 1.08E-11   | 2.12E-05   | 0.13054111 | 0.93092094 | 7.55E-27   | 4.56E-79   |
| 0.00861894 | 1.02E-05   | 0.8710473  | 0.00026934 | 0.5043675  | 5.90E-10   | 5.71E-10   |
| 0.00333715 | 0.28451785 | 0.78010169 | 4.79E-22   | 1.93E-46   | 0.66045261 | 0.43900353 |
| 2.40E-10   | 2.54E-06   | 0.18488578 | 0.20583712 | 0.37920633 | 2.91E-18   | 7.76E-40   |
| 0.0028364  | 4.47E-12   | 0.52978783 | 0.09906706 | 0.00549562 | 1.22E-57   | 5.34E-05   |
| 0.00031307 | 8.01E-08   | 0.3449973  | 1.04E-06   | 0.38150796 | 5.75E-08   | 2.66E-05   |
| 0.13914303 | 0.10607343 | 0.7351112  | 0.01452512 | 0.26099047 | 4.66E-11   | 6.98E-06   |

|            |            |            |            |            |            |            |
|------------|------------|------------|------------|------------|------------|------------|
| 3.73E-10   | 1.48E-05   | 0.00285516 | 0.05702061 | 0.24506809 | 0.31692976 | 0.00094702 |
| 0.3838213  | 0.22946352 | 0          | 0.6904386  | 0.97675211 | 0.60894006 | 0.84377601 |
| 0          | 9.07E-09   | 0.3400458  | 0.00070822 | 1.23E-06   | 1.13E-06   | 1.10E-15   |
| 9.07E-09   | 0          | 0.19623262 | 0.72841217 | 0.92464338 | 8.48E-07   | 0.00259113 |
| 0.3400458  | 0.19623262 | 0          | 0.9602207  | 0.99359835 | 0.64884079 | 0.94051744 |
| 0.00070822 | 0.72841217 | 0.9602207  | 0          | 1.75E-22   | 0.59545717 | 0.35801175 |
| 1.23E-06   | 0.92464338 | 0.99359835 | 1.75E-22   | 0          | 0.62699983 | 0.00817841 |
| 1.13E-06   | 8.48E-07   | 0.64884079 | 0.59545717 | 0.62699983 | 0          | 0.00099994 |
| 1.10E-15   | 0.00259113 | 0.94051744 | 0.35801175 | 0.00817841 | 0.00099994 | 0          |
| 1.05E-06   | 0.00052033 | 0.61279888 | 0.04366861 | 0.14030647 | 1.33E-15   | 1.92E-55   |
| 2.24E-07   | 0.16982594 | 0.11034814 | 0.06038095 | 0.60039347 | 0.00039498 | 0.00267298 |
| 0.00036856 | 6.40E-05   | 0.00038848 | 0.01625363 | 0.00030586 | 0.00018265 | 0.35599377 |
| 0.34613776 | 0.19918493 | 0          | 0.80108473 | 0.99320247 | 0.67227347 | 0.90570977 |
| 7.33E-20   | 3.35E-11   | 1.59E-07   | 0.17191133 | 0.27869257 | 2.19E-30   | 1.51E-51   |
| 0.00669952 | 0.00955767 | 0.54399047 | 0.01772673 | 0.03104753 | 4.82E-14   | 0.00297851 |
| 0.00032148 | 0.00558446 | 0.94196525 | 0.96474753 | 0.02603139 | 7.92E-08   | 6.61E-07   |
| 1.97E-17   | 1.95E-10   | 0.68249264 | 0.061987   | 0.48716682 | 3.16E-26   | 3.37E-82   |
| 7.81E-06   | 0.90479858 | 0.36334045 | 0.00012182 | 0.42122283 | 7.53E-09   | 1.30E-25   |
| 4.08E-06   | 0.00013065 | 0.82952318 | 0.00014524 | 0.00225388 | 0.55233291 | 7.82E-25   |
| 3.13E-11   | 0.49963929 | 2.65E-09   | 0.46705444 | 0.95430233 | 0.00014542 | 0.07178767 |
| 0.00025663 | 0.10921506 | 0.52136652 | 0.0008384  | 0.06734673 | 0.00192245 | 3.38E-51   |
| 0.2917245  | 0.05898089 | 0.37125207 | 1.63E-05   | 0.00358377 | 0.0144911  | 0.22524238 |
| 0.00191869 | 3.44E-05   | 0.17627384 | 0.00340139 | 0.37440951 | 0.02209989 | 5.16E-07   |
| 4.98E-17   | 3.46E-14   | 0.05361206 | 0.13421813 | 0.07570555 | 0.00025605 | 2.08E-16   |
| 0.15608821 | 0.05656929 | 0.76725734 | 8.05E-16   | 9.59E-05   | 0.06201935 | 0.0624559  |
| 5.96E-17   | 2.80E-06   | 0.57557518 | 0.00416053 | 0.20259131 | 0.00196596 | 7.27E-88   |

| PCK1       | RXRA       | PLIN5      | APOA1      | SCP2       | SLC27A1    | FABP2      |
|------------|------------|------------|------------|------------|------------|------------|
| 1.05E-08   | 0.23481043 | 4.62E-12   | 0.28533277 | 2.46E-14   | 0.00820352 | 0.00011166 |
| 0.32727523 | 0.13874796 | 0.85088092 | 0.91346471 | 0.22775966 | 0.36496548 | 0.97783367 |
| 6.10E-143  | 0.00745659 | 2.57E-07   | 0.00318334 | 6.40E-29   | 4.08E-05   | 5.69E-12   |
| 0.50318088 | 8.86E-05   | 6.94E-11   | 0.71902565 | 0.03744441 | 0.00384946 | 0.46624645 |
| 2.13E-105  | 0.00177079 | 8.20E-09   | 0.00027945 | 1.08E-27   | 0.05202637 | 7.48E-16   |
| 0.1211286  | 0.00478724 | 1.63E-14   | 0.34125433 | 0.29126998 | 0.79206413 | 0.02033764 |
| 3.01E-05   | 0.55985938 | 0.00021594 | 0.05050194 | 0.1132237  | 0.11511688 | 0.83768264 |
| 0.0017499  | 0.02932799 | 0.0098008  | 0.47594514 | 0.8768577  | 0.75627168 | 0.57888869 |
| 0.07699909 | 4.32E-08   | 0.00023181 | 0.3504761  | 0.9812173  | 0.19930004 | 0.27690455 |
| 3.19E-16   | 0.21222507 | 4.65E-07   | 3.66E-45   | 3.03E-14   | 0.00890778 | 8.90E-06   |
| 1.09E-06   | 0.28205571 | 3.52E-08   | 0.50999608 | 1.66E-11   | 0.47883219 | 0.00074518 |
| 0.70969741 | 0.34136071 | 0.12635234 | 0.99659037 | 0.03056056 | 0.27888648 | 0.69336408 |
| 1.70E-49   | 0.52545452 | 2.49E-08   | 0.66242913 | 2.80E-07   | 0.01470355 | 1.03E-16   |
| 0.39098092 | 0.21940496 | 0.44307598 | 0.23458793 | 0.03814051 | 0.31380614 | 0.60200746 |
| 0.00329177 | 0.89239297 | 0.27738259 | 0.70736038 | 0.00263349 | 0.88384665 | 0.07538257 |
| 2.65E-13   | 0.00932084 | 8.45E-14   | 0.53031541 | 3.07E-15   | 0.00069617 | 2.05E-07   |
| 0.00011986 | 5.28E-05   | 9.10E-07   | 0.75296321 | 2.05E-14   | 2.03E-05   | 0.02097879 |
| 2.31E-08   | 0.94070061 | 9.23E-05   | 0.81876202 | 0.67080895 | 0.00186821 | 0.38494234 |
| 0.05999998 | 0.00040652 | 1.62E-05   | 0.171284   | 5.65E-05   | 0.50073108 | 0.03588499 |
| 4.38E-98   | 0.04344953 | 3.63E-11   | 9.79E-24   | 5.69E-29   | 4.83E-06   | 1.12E-08   |
| 5.85E-10   | 0.01761481 | 1.03E-06   | 0.20624497 | 1.06E-30   | 0.0580195  | 2.58E-05   |
| 4.97E-85   | 0.66123256 | 3.29E-10   | 0.74452721 | 9.11E-38   | 4.54E-07   | 2.92E-12   |
| 0.40563739 | 0.18321387 | 1.23E-06   | 0          | 1.85E-06   | 0.11544131 | 0.89823334 |
| 3.14E-06   | 0.83283056 | 0.18143129 | 0.50797099 | 2.05E-07   | 0.42686123 | 0.47867909 |
| 0.83467885 | 0.05035982 | 0.55640107 | 0.0935186  | 8.38E-06   | 1.45E-06   | 0.0926249  |
| 0.7306385  | 0.13019233 | 0.00050546 | 0          | 2.82E-07   | 0.46332634 | 0.84742874 |
| 0.85348101 | 0.10945883 | 9.19E-16   | 0.70315114 | 0.25678124 | 0.00071208 | 0.04677083 |
| 0.73600257 | 0.24863531 | 0.00080575 | 0          | 3.09E-08   | 0.32884956 | 0.99998223 |
| 1.89E-47   | 0.21755246 | 2.18E-19   | 0.32407684 | 1.97E-33   | 0.0098909  | 8.75E-15   |
| 0.00178967 | 0.71128147 | 0.00029055 | 0.56474694 | 0.02526309 | 0.75062981 | 0.11909481 |
| 8.62E-08   | 0.20720529 | 1.20E-44   | 0.12405431 | 0.00110067 | 0.5840193  | 0.08788994 |
| 4.87E-75   | 0.02078309 | 0.81233853 | 0.77539538 | 1.63E-32   | 0.03920039 | 2.82E-12   |
| 5.70E-08   | 0.02778377 | 2.47E-06   | 0.59293857 | 0.02299934 | 0.59666416 | 0.02473598 |
| 2.85E-13   | 0.39434261 | 3.28E-15   | 0.75300248 | 4.99E-18   | 0.65522172 | 0.14790961 |
| 0.38938071 | 0.97336331 | 0.0129569  | 0.96590077 | 0.97600642 | 0.61390108 | 0.99840515 |
| 4.37E-05   | 0.65299505 | 0.24379829 | 0.50012785 | 3.63E-07   | 0.38774627 | 0.06508711 |
| 1.68E-74   | 0.19697193 | 0.37978728 | 0.79244136 | 1.98E-20   | 0.01604851 | 9.51E-08   |
| 0.0010553  | 0.44959286 | 0.423222   | 0.61632264 | 5.09E-05   | 0.01117679 | 0.81976151 |
| 0.86511289 | 0.16507919 | 0.00817448 | 0.8804951  | 0.58170797 | 0.76198955 | 0.3020531  |
| 6.44E-83   | 0.46285453 | 2.69E-09   | 2.61E-05   | 1.20E-66   | 4.70E-14   | 1.53E-18   |
| 8.41E-14   | 0.10053962 | 0.00173997 | 0.88515994 | 3.69E-11   | 0.0825047  | 0.00020039 |
| 0.66556542 | 0.18167184 | 0.03879347 | 0.76637755 | 0.06066845 | 0.49802051 | 0.46671556 |
| 1.46E-119  | 0.64513246 | 2.10E-12   | 0.19756581 | 9.47E-29   | 1.14E-06   | 3.10E-11   |
| 5.83E-09   | 0.01856295 | 3.94E-19   | 0.54805063 | 2.24E-41   | 1.24E-10   | 0.00078157 |
| 0.84550258 | 0.12870262 | 3.75E-10   | 0.34780801 | 0.21743431 | 0.15510055 | 0.11379981 |
| 0.0029224  | 0.02735295 | 0.00139559 | 0.74344742 | 3.79E-15   | 5.39E-10   | 0.34962099 |

|            |            |            |            |            |            |            |
|------------|------------|------------|------------|------------|------------|------------|
| 0.00909001 | 0.06652559 | 4.52E-09   | 0.00227031 | 3.86E-07   | 0.00022315 | 0.05431146 |
| 0.77072519 | 0.14577181 | 0.00059847 | 0          | 1.87E-07   | 0.45903133 | 0.85236809 |
| 1.05E-06   | 2.24E-07   | 0.00036856 | 0.34613776 | 7.33E-20   | 0.00669952 | 0.00032148 |
| 0.00052033 | 0.16982594 | 6.40E-05   | 0.19918493 | 3.35E-11   | 0.00955767 | 0.00558446 |
| 0.61279888 | 0.11034814 | 0.00038848 | 0          | 1.59E-07   | 0.54399047 | 0.94196525 |
| 0.04366861 | 0.06038095 | 0.01625363 | 0.80108473 | 0.17191133 | 0.01772673 | 0.96474753 |
| 0.14030647 | 0.60039347 | 0.00030586 | 0.99320247 | 0.27869257 | 0.03104753 | 0.02603139 |
| 1.33E-15   | 0.00039498 | 0.00018265 | 0.67227347 | 2.19E-30   | 4.82E-14   | 7.92E-08   |
| 1.92E-55   | 0.00267298 | 0.35599377 | 0.90570977 | 1.51E-51   | 0.00297851 | 6.61E-07   |
| 0          | 0.0008239  | 2.00E-08   | 0.64803491 | 3.10E-26   | 2.81E-05   | 5.97E-11   |
| 0.0008239  | 0          | 0.00190041 | 0.13909847 | 0.11511461 | 1.54E-09   | 0.49274858 |
| 2.00E-08   | 0.00190041 | 0          | 0.00045997 | 0.00526837 | 0.91596599 | 0.00653352 |
| 0.64803491 | 0.13909847 | 0.00045997 | 0          | 1.51E-07   | 0.49628624 | 0.91994599 |
| 3.10E-26   | 0.11511461 | 0.00526837 | 1.51E-07   | 0          | 6.60E-13   | 7.68E-07   |
| 2.81E-05   | 1.54E-09   | 0.91596599 | 0.49628624 | 6.60E-13   | 0          | 0.0022104  |
| 5.97E-11   | 0.49274858 | 0.00653352 | 0.91994599 | 7.68E-07   | 0.0022104  | 0          |
| 4.97E-70   | 0.57169569 | 3.94E-06   | 0.67621534 | 4.06E-98   | 6.71E-12   | 1.08E-07   |
| 0.11497377 | 0.0480267  | 0.10101455 | 0.38113217 | 1.58E-05   | 0.27351321 | 0.29781882 |
| 2.30E-26   | 0.86564649 | 1.62E-14   | 0.87168766 | 2.54E-09   | 0.53030942 | 0.00012052 |
| 0.00553439 | 0.00272841 | 0.00110883 | 2.12E-09   | 0.08846309 | 0.34161026 | 0.0141523  |
| 1.48E-68   | 0.34150561 | 0.11798884 | 0.51101689 | 1.69E-16   | 0.0133049  | 0.00790294 |
| 0.00235419 | 0.05357315 | 0.000518   | 0.41045043 | 4.19E-06   | 0.00182041 | 0.23936171 |
| 0.13445586 | 3.24E-06   | 1.45E-12   | 0.18986068 | 0.25616747 | 0.00997441 | 0.00033218 |
| 7.29E-10   | 0.09565133 | 3.30E-29   | 0.05418147 | 4.02E-25   | 0.9199475  | 0.12916115 |
| 0.01051257 | 0.64762079 | 0.60983578 | 0.77951807 | 0.47245321 | 0.0253056  | 0.87765544 |
| 1.00E-28   | 0.45429739 | 0.00804571 | 0.57137373 | 5.78E-64   | 0.00174554 | 0.00029235 |



| ACADM      | ACADL      | AQP7       | FADS2      | CYP4A22    | LPL        | ILK        |
|------------|------------|------------|------------|------------|------------|------------|
| 5.22E-21   | 0.00304683 | 0.00017666 | 2.94E-08   | 0.23802345 | 3.50E-06   | 0.16535241 |
| 0.09609275 | 0.13683898 | 0.22949797 | 0.75629238 | 0.39097326 | 0.53773249 | 0.06732621 |
| 2.47E-88   | 0.60404603 | 4.29E-28   | 0.00966949 | 9.75E-64   | 0.10666657 | 0.02350262 |
| 0.21502922 | 3.68E-15   | 7.99E-09   | 8.06E-05   | 0.08564634 | 0.00014645 | 0.09395746 |
| 2.20E-82   | 0.70040279 | 1.62E-24   | 0.00822932 | 5.84E-48   | 0.04339921 | 0.20566982 |
| 0.90810379 | 4.21E-26   | 0.00027813 | 0.00053941 | 1.18E-05   | 0.00461845 | 1.38E-12   |
| 0.05651329 | 4.13E-23   | 4.98E-06   | 0.59313395 | 5.12E-12   | 0.39085254 | 8.31E-05   |
| 0.00936543 | 0.03962348 | 1.83E-07   | 0.00028549 | 6.33E-05   | 0.19201276 | 1.48E-07   |
| 0.58970543 | 0.17985333 | 0.00242623 | 0.9707995  | 0.2049095  | 5.84E-06   | 0.49069869 |
| 3.12E-11   | 0.00454825 | 0.17701016 | 7.69E-05   | 1.17E-08   | 0.00686795 | 0.00080166 |
| 1.36E-16   | 8.47E-07   | 1.70E-07   | 0.00079416 | 0.00018263 | 0.94308132 | 0.52795301 |
| 0.93239896 | 0.30665334 | 0.55154937 | 0.57059196 | 0.50407728 | 0.54359215 | 0.03702257 |
| 3.41E-40   | 0.20305819 | 2.55E-16   | 0.68911111 | 3.71E-27   | 0.2447912  | 1.26E-08   |
| 0.15762683 | 0.79010219 | 0.60669154 | 0.61835413 | 0.46163185 | 0.2487516  | 0.04146152 |
| 0.00762646 | 8.95E-14   | 4.63E-05   | 0.42775401 | 4.65E-05   | 0.16134448 | 0.07862302 |
| 1.17E-22   | 0.05507123 | 7.64E-08   | 1.53E-06   | 0.00029964 | 7.00E-05   | 0.02079552 |
| 4.44E-11   | 0.05700517 | 0.02235664 | 0.00013892 | 0.07841555 | 4.49E-07   | 0.0337601  |
| 0.00081067 | 0.03502193 | 4.85E-11   | 0.41537755 | 1.12E-06   | 0.00041128 | 0.04653961 |
| 0.00047317 | 0.00771504 | 2.97E-06   | 0.33127744 | 0.48230476 | 0.03239809 | 1.79E-06   |
| 7.46E-70   | 0.01001269 | 3.70E-19   | 0.28049081 | 4.42E-60   | 0.28179524 | 8.17E-05   |
| 3.33E-43   | 3.14E-08   | 6.29E-07   | 0.00120721 | 0.00239085 | 2.41E-06   | 3.29E-07   |
| 7.97E-98   | 6.03E-10   | 2.81E-36   | 0.00013973 | 2.72E-50   | 0.1763148  | 0.08442371 |
| 0.82560091 | 0.23976524 | 0.38286909 | 1.30E-08   | 0.42842882 | 0.41495199 | 0.03697946 |
| 2.81E-09   | 0.02608528 | 0.00015031 | 0.01904179 | 0.00035133 | 3.57E-09   | 5.45E-12   |
| 0.98249536 | 8.25E-07   | 4.55E-07   | 0.0022873  | 0.05214541 | 0.00131312 | 6.40E-19   |
| 0.59153996 | 0.36208018 | 0.89179944 | 1.64E-09   | 0.58755696 | 0.39452626 | 0.21605792 |
| 0.6930634  | 0.39054115 | 1.39E-08   | 0.83362118 | 0.71903758 | 2.81E-08   | 0.17696505 |
| 0.96267309 | 0.908893   | 0.92709044 | 2.69E-09   | 0.32135968 | 0.40399145 | 0.38205684 |
| 3.81E-83   | 2.91E-08   | 3.65E-31   | 0.00065587 | 4.88E-22   | 4.44E-13   | 0.13907172 |
| 0.00038466 | 0.38264765 | 0.0007762  | 0.0056548  | 0.07989953 | 0.0198344  | 0.16324094 |
| 8.91E-09   | 2.04E-05   | 6.00E-11   | 0.02498253 | 0.02649195 | 6.53E-05   | 3.48E-07   |
| 3.61E-65   | 1.63E-16   | 1.33E-26   | 0.00162269 | 2.46E-48   | 0.06919152 | 4.11E-06   |
| 3.31E-07   | 0.53217932 | 5.48E-07   | 1.81E-12   | 1.04E-05   | 0.00307273 | 0.34884769 |
| 1.98E-37   | 2.79E-19   | 6.45E-23   | 0.0035612  | 4.42E-15   | 1.38E-11   | 2.03E-05   |
| 0.64682834 | 0.64820058 | 0.26272239 | 0.70896275 | 0.14785179 | 0.16879633 | 0.10862581 |
| 5.81E-14   | 5.65E-05   | 0.55169382 | 2.55E-05   | 0.10010149 | 3.76E-07   | 0.33389657 |
| 1.03E-49   | 8.86E-16   | 6.49E-40   | 0.28676857 | 9.63E-207  | 0.13834661 | 0.07465758 |
| 4.52E-09   | 9.92E-18   | 1.75E-07   | 0.08553424 | 3.57E-05   | 6.08E-06   | 1.00E-06   |
| 0.95387703 | 0.19506998 | 0.00102064 | 0.73950164 | 0.82949221 | 1.40E-16   | 0.89093454 |
| 2.83E-118  | 0.00531059 | 1.37E-25   | 0.00852913 | 1.38E-43   | 1.80E-06   | 0.83500526 |
| 1.02E-18   | 0.46656503 | 1.83E-06   | 0.04523083 | 3.74E-08   | 6.46E-06   | 0.15765331 |
| 0.2897242  | 0.78404359 | 0.00113307 | 0.83515438 | 0.9504382  | 1.43E-11   | 0.78395992 |
| 7.44E-99   | 0.5918366  | 2.41E-33   | 2.02E-05   | 2.28E-80   | 0.03413401 | 0.00284318 |
| 2.73E-36   | 0.40811271 | 0.00037871 | 0.00061288 | 0.05616249 | 5.76E-14   | 0.34340455 |
| 0.24451249 | 1.98E-17   | 0.08221324 | 0.11187095 | 4.44E-06   | 4.62E-09   | 3.71E-13   |
| 2.71E-08   | 1.37E-14   | 1.46E-07   | 0.46861938 | 0.34962819 | 0.00410398 | 0.0041509  |

|            |            |            |            |            |            |            |
|------------|------------|------------|------------|------------|------------|------------|
| 2.01E-05   | 0.3653117  | 3.11E-08   | 0.47038462 | 0.00644601 | 0.78319497 | 0.00046794 |
| 0.62895678 | 0.458779   | 0.90592668 | 1.87E-09   | 0.55806313 | 0.43326803 | 0.25835247 |
| 1.97E-17   | 7.81E-06   | 4.08E-06   | 3.13E-11   | 0.00025663 | 0.2917245  | 0.00191869 |
| 1.95E-10   | 0.90479858 | 0.00013065 | 0.49963929 | 0.10921506 | 0.05898089 | 3.44E-05   |
| 0.68249264 | 0.36334045 | 0.82952318 | 2.65E-09   | 0.52136652 | 0.37125207 | 0.17627384 |
| 0.061987   | 0.00012182 | 0.00014524 | 0.46705444 | 0.0008384  | 1.63E-05   | 0.00340139 |
| 0.48716682 | 0.42122283 | 0.00225388 | 0.95430233 | 0.06734673 | 0.00358377 | 0.37440951 |
| 3.16E-26   | 7.53E-09   | 0.55233291 | 0.00014542 | 0.00192245 | 0.0144911  | 0.02209989 |
| 3.37E-82   | 1.30E-25   | 7.82E-25   | 0.07178767 | 3.38E-51   | 0.22524238 | 5.16E-07   |
| 4.97E-70   | 0.11497377 | 2.30E-26   | 0.00553439 | 1.48E-68   | 0.00235419 | 0.13445586 |
| 0.57169569 | 0.0480267  | 0.86564649 | 0.00272841 | 0.34150561 | 0.05357315 | 3.24E-06   |
| 3.94E-06   | 0.10101455 | 1.62E-14   | 0.00110883 | 0.11798884 | 0.000518   | 1.45E-12   |
| 0.67621534 | 0.38113217 | 0.87168766 | 2.12E-09   | 0.51101689 | 0.41045043 | 0.18986068 |
| 4.06E-98   | 1.58E-05   | 2.54E-09   | 0.08846309 | 1.69E-16   | 4.19E-06   | 0.25616747 |
| 6.71E-12   | 0.27351321 | 0.53030942 | 0.34161026 | 0.0133049  | 0.00182041 | 0.00997441 |
| 1.08E-07   | 0.29781882 | 0.00012052 | 0.0141523  | 0.00790294 | 0.23936171 | 0.00033218 |
| 0          | 2.35E-05   | 1.55E-24   | 3.41E-05   | 1.67E-45   | 6.49E-10   | 0.0817342  |
| 2.35E-05   | 0          | 5.55E-13   | 0.75584211 | 8.61E-10   | 0.96918983 | 3.46E-06   |
| 1.55E-24   | 5.55E-13   | 0          | 0.00013468 | 1.59E-35   | 6.53E-05   | 0.44013462 |
| 3.41E-05   | 0.75584211 | 0.00013468 | 0          | 0.23773909 | 0.04590679 | 0.00159871 |
| 1.67E-45   | 8.61E-10   | 1.59E-35   | 0.23773909 | 0          | 0.05551608 | 0.69957954 |
| 6.49E-10   | 0.96918983 | 6.53E-05   | 0.04590679 | 0.05551608 | 0          | 0.09280683 |
| 0.0817342  | 3.46E-06   | 0.44013462 | 0.00159871 | 0.69957954 | 0.09280683 | 0          |
| 6.37E-33   | 3.87E-09   | 2.74E-27   | 0.01071182 | 8.47E-11   | 3.97E-11   | 0.19179265 |
| 0.96263732 | 0.00090356 | 7.54E-08   | 0.66879281 | 1.11E-09   | 1.15E-07   | 0.00164871 |
| 2.51E-92   | 1.19E-13   | 1.47E-27   | 0.00629405 | 2.19E-36   | 8.90E-05   | 1.21E-08   |

| ACSL1      | FABP4      | CPT2       |
|------------|------------|------------|
| 2.83E-09   | 0.06856707 | 1.63E-06   |
| 0.52767467 | 0.64703443 | 0.05863876 |
| 5.09E-08   | 0.64983119 | 4.91E-28   |
| 3.29E-30   | 1.86E-13   | 0.03594612 |
| 6.71E-11   | 0.78232414 | 8.63E-28   |
| 0.00022517 | 0.00492704 | 3.01E-12   |
| 0.40084071 | 0.00189732 | 1.98E-09   |
| 0.00875871 | 0.93067484 | 0.00127636 |
| 0.0011366  | 0.04166542 | 0.637174   |
| 0.29341525 | 0.03408952 | 0.00060502 |
| 9.22E-13   | 0.27362281 | 1.80E-18   |
| 0.2931377  | 0.7789546  | 0.66765586 |
| 0.05673742 | 0.44223424 | 5.88E-09   |
| 0.56414486 | 0.33555513 | 0.00883153 |
| 0.63241026 | 0.00017889 | 0.35858604 |
| 4.26E-10   | 0.12956882 | 7.56E-09   |
| 1.22E-09   | 0.07880842 | 0.00014237 |
| 3.24E-06   | 0.02871273 | 0.04275506 |
| 2.92E-06   | 0.07862899 | 7.49E-05   |
| 1.72E-07   | 0.50232988 | 1.46E-17   |
| 3.81E-32   | 0.14515661 | 6.04E-37   |
| 5.03E-20   | 0.57548055 | 1.29E-36   |
| 0.02666474 | 0.7415279  | 0.43584654 |
| 6.25E-09   | 0.00687625 | 6.69E-06   |
| 0.9905767  | 0.00769133 | 0.08882505 |
| 0.05339895 | 0.79570575 | 0.52779445 |
| 2.73E-05   | 9.23E-13   | 0.00552962 |
| 0.01992422 | 0.72894022 | 0.89094356 |
| 4.86E-54   | 0.94883495 | 9.13E-52   |
| 6.97E-06   | 0.10048858 | 0.00568899 |
| 1.10E-26   | 0.53670741 | 3.08E-07   |
| 9.90E-09   | 0.00044074 | 4.20E-53   |
| 0.01560384 | 0.91814012 | 0.00092934 |
| 2.52E-77   | 0.0131741  | 2.11E-45   |
| 0.00107906 | 0.45937198 | 0.90698674 |
| 0.61254231 | 0.32673002 | 0.0001448  |
| 3.00E-11   | 2.36E-08   | 2.89E-48   |
| 3.38E-06   | 0.00478394 | 7.30E-08   |
| 0.6549296  | 1.88E-23   | 0.57493451 |
| 7.60E-30   | 0.77968862 | 8.41E-64   |
| 2.87E-08   | 0.11418395 | 3.92E-13   |
| 0.32628525 | 6.20E-22   | 0.25412534 |
| 6.12E-13   | 0.4257871  | 6.20E-39   |
| 1.61E-40   | 0.36631519 | 1.42E-11   |
| 0.74360226 | 3.22E-76   | 0.04301665 |
| 0.84335049 | 0.04094971 | 2.07E-06   |

|            |            |            |
|------------|------------|------------|
| 3.74E-16   | 0.6035802  | 1.22E-14   |
| 0.05202652 | 0.80541743 | 0.55122702 |
| 4.98E-17   | 0.15608821 | 5.96E-17   |
| 3.46E-14   | 0.05656929 | 2.80E-06   |
| 0.05361206 | 0.76725734 | 0.57557518 |
| 0.13421813 | 8.05E-16   | 0.00416053 |
| 0.07570555 | 9.59E-05   | 0.20259131 |
| 0.00025605 | 0.06201935 | 0.00196596 |
| 2.08E-16   | 0.0624559  | 7.27E-88   |
| 7.29E-10   | 0.01051257 | 1.00E-28   |
| 0.09565133 | 0.64762079 | 0.45429739 |
| 3.30E-29   | 0.60983578 | 0.00804571 |
| 0.05418147 | 0.77951807 | 0.57137373 |
| 4.02E-25   | 0.47245321 | 5.78E-64   |
| 0.9199475  | 0.0253056  | 0.00174554 |
| 0.12916115 | 0.87765544 | 0.00029235 |
| 6.37E-33   | 0.96263732 | 2.51E-92   |
| 3.87E-09   | 0.00090356 | 1.19E-13   |
| 2.74E-27   | 7.54E-08   | 1.47E-27   |
| 0.01071182 | 0.66879281 | 0.00629405 |
| 8.47E-11   | 1.11E-09   | 2.19E-36   |
| 3.97E-11   | 1.15E-07   | 8.90E-05   |
| 0.19179265 | 0.00164871 | 1.21E-08   |
| 0          | 0.07969157 | 1.71E-40   |
| 0.07969157 | 0          | 0.00405648 |
| 1.71E-40   | 0.00405648 | 0          |
